# Supplementary material
Source: HighWire-hosted journal article supplement (https://jnm.snmjournals.org/highwire/filestream/94853/field_highwire_adjunct_files/0/164699_Supplemental_Data.pdf)
Supplement: 164699_Supplemental_Data.pdf [file 164699_Supplemental_Data.pdf]

## **PBPK Model equations**

The following equations describe the transport of labeled (indexed with \*) and unlabeled peptide via blood flow, extravasation, binding, internalization, degradation and release, excretion and radioactive decay. The peptide was injected as a  $51 \pm 8$  min infusion for pre-therapeutic measurements.

Compared to the recently published model (1), more organs (including the red marrow) are explicitly, i.e. closer to physiological reality, modelled. A less empirical and more physiological model usually allows more accurate extrapolation from different condition (here different peptide amounts) and can be easier adapted for other peptides. The variables are defined in Table A.

### **Bound and internalized peptide:**

Liver, spleen, tumor, kidney, red marrow (RM), GI, muscle, prostate/uterus, adrenals and rest.

Constraint for total sst2 receptors  $R_{0,i}$

$$R_{0,i} = R_i + RP_i + RP_i^* \quad (1)$$

Internalized peptide

$$\begin{aligned} \frac{d}{dt} P_{\text{intern } i} &= \lambda_{\text{int},i} \cdot RP_i - \lambda_{\text{release},i} \cdot P_{\text{intern } i} + \lambda_{\text{phy}} \cdot P_{\text{intern } i}^* \\ \frac{d}{dt} P_{\text{intern } i}^* &= \lambda_{\text{int},i} \cdot RP_i^* - \lambda_{\text{release},i} \cdot P_{\text{intern } i}^* - \lambda_{\text{phy}} \cdot P_{\text{intern } i}^* \end{aligned} \quad (2)$$

Bound peptide on cell surface

$$\begin{aligned}
\frac{d}{dt} RP_i &= k_{on} \cdot P_{i,int} \cdot \frac{R_i}{V_{i,int}} - (k_{off} + \lambda_{int,i}) \cdot RP_i + \lambda_{phy} \cdot RP_i^* \\
\frac{d}{dt} RP_i^* &= k_{on} \cdot P_{i,int}^* \cdot \frac{R_i}{V_{i,int}} - (k_{off} + \lambda_{int,i}) \cdot RP_i^* - \lambda_{phy} \cdot RP_i^*
\end{aligned}
\tag{3}$$

### **Free peptide, vascular:**

Transcapillary extravasation is described by the permeability surface area product ( $PS_i$ ) and the vascular ( $V_{i,v}$ ) and interstitial volumes ( $V_{i,int}$ ) of the pertaining tissue. Convection from the vascular to the interstitial space is neglected as  $^{90}\text{Y}$ -DOTATATE represents a rather small molecule (2).

All tissues except kidneys and lungs

$$\begin{aligned}
\frac{d}{dt} P_{i,v} &= PS_i \left( \frac{P_{i,int}}{V_{i,int}} - \frac{P_{i,v}}{V_{i,v}} \right) + F_i \left( \frac{P_{ART}}{V_{ART}} - \frac{P_{i,v}}{V_{i,v}} \right) + \lambda_{phy} \cdot P_{i,v}^* \\
\frac{d}{dt} P_{i,v}^* &= PS_i \left( \frac{P_{i,int}^*}{V_{i,int}} - \frac{P_{i,v}^*}{V_{i,v}} \right) + F_i \left( \frac{P_{ART}^*}{V_{ART}} - \frac{P_{i,v}^*}{V_{i,v}} \right) - \lambda_{phy} \cdot P_{i,v}^*
\end{aligned}
\tag{4}$$

For brain  $PS = 0$

Lungs

$$\begin{aligned}
\frac{d}{dt} P_{LU,v} &= PS_{LU} \left( \frac{P_{LU,int}}{V_{LU,int}} - \frac{P_{LU,v}}{V_{LU,v}} \right) + F \left( \frac{P_{VEN}}{V_{VEN}} - \frac{P_{LU,v}}{V_{LU,v}} \right) + \lambda_{phy} \cdot P_{LU,v}^* \\
\frac{d}{dt} P_{LU,v}^* &= PS_{LU} \left( \frac{P_{LU,int}^*}{V_{LU,int}} - \frac{P_{LU,v}^*}{V_{LU,v}} \right) + F \left( \frac{P_{VEN}}{V_{VEN}} - \frac{P_{LU,v}^*}{V_{LU,v}} \right) - \lambda_{phy} \cdot P_{LU,v}^*
\end{aligned}
\tag{5}$$

Kidneys

$$\begin{aligned}
\frac{d}{dt} P_{K,v} &= -\frac{P_{K,v}}{V_{K,v}} \cdot (F_{fil} + F_K) + \frac{F_K}{V_{ART}} \cdot P_{ART} + \frac{P_{intra,K}}{V_{intra,K}} \cdot (F_{fil} - F_{ex}) + \lambda_{phy} \cdot P_{K,v} \\
\frac{d}{dt} P_{K,v}^* &= -\frac{P_{K,v}^*}{V_{K,v}} \cdot (F_{fil} + F_K) + \frac{F_K}{V_{ART}} \cdot P_{ART}^* + \frac{P_{intra,K}^*}{V_{intra,K}} \cdot (F_{fil} - F_{ex}) - \lambda_{phy} \cdot P_{K,v}^*
\end{aligned} \tag{6}$$

Veins

$$\begin{aligned}
\frac{d}{dt} P_{VEN} &= -k_{Pr} \cdot P_{VEN} + \sum \frac{F_i}{V_i} P_{i,v} - \frac{F_M}{V_M} P_{M,v} - \frac{F_{GL}}{V_{GL}} P_{GL,v} + \frac{F_M + F_{GL}}{V_L} P_{L,v} + \lambda_{phy} \cdot P_{VEN} \\
\frac{d}{dt} P_{VEN}^* &= -k_{Pr} \cdot P_{VEN}^* + \sum \frac{F_i}{V_i} P_{i,v}^* - \frac{F_M}{V_M} P_{M,v}^* - \frac{F_{GL}}{V_{GL}} P_{GL,v}^* + \frac{F_M + F_{GL}}{V_L} P_{L,v}^* - \lambda_{phy} \cdot P_{VEN}^*
\end{aligned} \tag{7}$$

Arteries

$$\begin{aligned}
\frac{d}{dt} P_{ART} &= -\sum \frac{F_i}{V_{ART}} \cdot P_{i,v} + \frac{F}{V_{LU,v}} \cdot P_{LU,v} + \lambda_{phy} \cdot P_{ART} \\
\frac{d}{dt} P_{ART}^* &= -\sum \frac{F_i}{V_{ART}} \cdot P_{i,v}^* + \frac{F}{V_{LU,v}} \cdot P_{LU,v} - \lambda_{phy} \cdot P_{ART}^*
\end{aligned} \tag{8}$$

### **Free peptide, interstitial spaces:**

Kidneys:

$$\begin{aligned}
\frac{d}{dt} P_{K,int} &= -k_{on} \cdot P_{K,int} \cdot \frac{R_K}{V_{K,int}} + k_{off} \cdot RP_K + F_{fil} \left( \frac{P_{K,v}}{V_{K,v}} - \frac{P_{K,int}}{V_{K,int}} \right) + \lambda_{phy} \cdot P_{K,int} \\
\frac{d}{dt} P_{K,int}^* &= -k_{on} \cdot P_{K,int}^* \cdot \frac{R_K}{V_{K,int}} + k_{off} \cdot RP_K^* + F_{fil} \left( \frac{P_{K,v}^*}{V_{K,v}} - \frac{P_{K,int}^*}{V_{K,int}} \right) - \lambda_{phy} \cdot P_{K,int}^*
\end{aligned} \tag{9}$$

Skin, adipose tissue, heart, bone, lungs and brain (PS = 0):

$$\begin{aligned}\frac{d}{dt} P_{i,int} &= PS_i \left( \frac{P_{i,v}}{V_{i,v}} - \frac{P_{i,int}}{V_{i,int}} \right) + \lambda_{phy} \cdot P_{i,int}^* \\ \frac{d}{dt} P_{i,int}^* &= PS_i \left( \frac{P_{i,v}^*}{V_{i,v}} - \frac{P_{i,int}^*}{V_{i,int}} \right) - \lambda_{phy} \cdot P_{i,int}^*\end{aligned}\tag{10}$$

Liver, spleen, tumor, RM, GI, muscle, prostate/uterus, adrenals, rest:

$$\begin{aligned}\frac{d}{dt} P_{i,int} &= -k_{on} \cdot P_{i,int} \cdot \frac{R_i}{V_{i,int}} + k_{off} \cdot RP_i + PS_i \left( \frac{P_{i,v}}{V_{i,v}} - \frac{P_{i,int}}{V_{i,int}} \right) + \lambda_{phy} \cdot P_{i,int}^* \\ \frac{d}{dt} P_{i,int}^* &= -k_{on} \cdot P_{i,int}^* \cdot \frac{R_i}{V_{i,int}} + k_{off} \cdot RP_i^* + PS_i \left( \frac{P_{i,v}^*}{V_{i,v}} - \frac{P_{i,int}^*}{V_{i,int}} \right) - \lambda_{phy} \cdot P_{i,int}^*\end{aligned}\tag{11}$$

### **Further equations:**

Peptide in kidney cells (unspecific)

$$\begin{aligned}\frac{d}{dt} P_{intra,K} &= \frac{P_{int,K}}{V_{int,K}} \cdot (F_{fil} - F_{ex}) - \frac{P_{intra,K}}{V_{intra,K}} \cdot (F_{fil} - F_{ex}) + \lambda_{phy} \cdot P_{intra,K}^* \\ \frac{d}{dt} P_{intra,K}^* &= \frac{P_{int,K}^*}{V_{int,K}} \cdot (F_{fil} - F_{ex}) - \frac{P_{intra,K}^*}{V_{intra,K}} \cdot (F_{fil} - F_{ex}) - \lambda_{phy} \cdot P_{intra,K}^*\end{aligned}\tag{12}$$

Bound to protein

$$\begin{aligned}\frac{d}{dt} PPR &= k_{PR} \cdot P_{VEN} + \lambda_{phy} \cdot PPR^* \\ \frac{d}{dt} PPR^* &= k_{PR} \cdot P_{VEN}^* - \lambda_{phy} \cdot PPR^*\end{aligned}\tag{13}$$

**SUPPLEMENTAL TABLE 1 Parameter definition**

| Variable               |                                                                                        | Value                                                                  | Unit                               | Source                         |
|------------------------|----------------------------------------------------------------------------------------|------------------------------------------------------------------------|------------------------------------|--------------------------------|
| $K_{on}$               | association rate                                                                       | $k_{off} / K_D$                                                        | $l \cdot nmol^{-1} \cdot min^{-1}$ |                                |
| $k_{off}$              | dissociation rate                                                                      | 0.04                                                                   | $min^{-1}$                         | (3) <sup>a</sup>               |
| $K_D$                  | dissociation constant                                                                  | 0.4                                                                    | $nmol \cdot l^{-1}$                | (1)                            |
| $\lambda_{phy}$        | physical decay $^{111}In$ $^{90}Y$                                                     | $1.72 \cdot 10^{-4}$ and $1.80 \cdot 10^{-4}$                          | $min^{-1}$                         |                                |
| BW                     | body weight                                                                            | individually measured                                                  | kg                                 |                                |
| H                      | hematocrit                                                                             | individually measured                                                  | unity                              |                                |
| F                      | flow total serum                                                                       | $V_P \cdot 1.23/min^b$                                                 | $l \cdot min^{-1}$                 | (4)                            |
| $V_P$                  | volume of total body serum                                                             | male $2.8 \cdot (1-H) \cdot BSA$<br>female $2.4 \cdot (1-H) \cdot BSA$ | l                                  | (5)                            |
| <b>Tumor</b>           |                                                                                        |                                                                        |                                    |                                |
| $V_{TU,total}$         | total volume of tumor 1 and 2                                                          | measured                                                               | l                                  |                                |
| $V_{TU,int}$           | interstitial space of tumor                                                            | $V_{tu,int} \cdot V_{TU,total}$                                        | l                                  |                                |
| $V_{TU,v}$             | interstitial space of tumor                                                            | $V_{tu,v} \cdot V_{TU,total}$                                          | l                                  |                                |
| $v_{TU,int}$           | interstitial space fraction of total tumor                                             | 0.3 for NET<br>0.23 for meningioma                                     | unity                              | derived from<br>(6) menin. (7) |
| $v_{TU,v}$             | vascular fraction of total tumor                                                       | 0.1 for NET<br>0.11 for meningioma                                     | unity                              | NET (8)<br>menin. (7)          |
| $F_{TU}$               | serum flow tumor                                                                       | $f_{tu} \cdot (1-H) \cdot V_{total,Tu}$                                | $l \cdot min^{-1}$                 |                                |
| $f_{TU}$               | serum flow density tumor                                                               | 1.0·(1-H) for NET metastasis<br>0.9·(1-H) for meningioma               | $ml \cdot min^{-1} \cdot g^{-1}$   | NET (8)<br>menin. (9)          |
| $PS_{TU}$              | permeability surface area product                                                      | $k_{TU} \cdot V_{TU,total}$                                            | $ml \cdot min^{-1}$                |                                |
| $k_{TU}$               | permeability surface area product per unit mass (scaled for molecule size of DOTATATE) | 0.2 NET metastasis<br>0.31 meningioma                                  | $ml \cdot min^{-1} \cdot g^{-1}$   | NET (8)<br>menin. (7)          |
| $[R_{TU,0}]$           | sst2 receptor density tumour                                                           | fitted                                                                 | $nmol \cdot l^{-1}$                |                                |
| $R_{TU,0}$             | sst2 receptor number tumour                                                            | $[R_{TU,0}] \cdot V_{TU,total}$                                        | nmol                               |                                |
| $\lambda_{TU,int}$     |                                                                                        | 0.001 (preliminary fits, Sup. D)                                       | $min^{-1}$                         |                                |
| $\lambda_{TU,release}$ |                                                                                        | fitted                                                                 | $min^{-1}$                         |                                |
| <b>Measured organs</b> |                                                                                        |                                                                        |                                    |                                |
| $V_{L,total}$          | volume total liver                                                                     | individually measured                                                  | l                                  |                                |
| $V_{S,total}$          | volume total spleen                                                                    | individually measured                                                  | l                                  |                                |
| $V_{K,total}$          | volume total kidney                                                                    | individually measured                                                  | l                                  |                                |
| $V_{i,v}$              | Vascular (serum) volume organ liver, spleen, kidney                                    | $V_{i,total} \cdot V_{i,v}$                                            | l                                  |                                |
| $V_{i,int}$            | interstitial volume liver, spleen, kidneys                                             | $V_{i,total} \cdot V_{i,int}$                                          | l                                  |                                |
| $V_{K,intra}$          | volume intracellular kidney                                                            | $(V_{K,total} - V_{K,int} - V_{K,v}) \cdot 2/3^c$                      | l                                  |                                |
| $v_{L,v}$              | vascular (serum) fraction liver                                                        | 0.085                                                                  | unity                              | (10)                           |
| $v_{S,v}$              | vascular (serum) fraction spleen                                                       | 0.12                                                                   | unity                              | (10)                           |
| $v_{K,v}$              | vascular (serum) fraction kidneys                                                      | 0.055                                                                  | unity                              | (10)                           |
| $v_{L,int}$            | interstitial fraction liver                                                            | 0.2                                                                    | unity                              | (10)                           |
| $v_{S,int}$            | interstitial fraction spleen                                                           | 0.2                                                                    | unity                              | (10)                           |
| $v_{K,int}$            | interstitial fraction kidney                                                           | 0.15                                                                   | unity                              | (10)                           |
| $F_L$                  | serum flow liver arterial                                                              | $0.065 \cdot F$                                                        | $l \cdot min^{-1}$                 | (4)                            |
| $F_S$                  | serum flow spleen                                                                      | $0.03 \cdot F$                                                         | $l \cdot min^{-1}$                 | (4)                            |
| $F_K$                  | serum flow kidneys                                                                     | $0.19 \cdot F$                                                         | $l \cdot min^{-1}$                 | (4)                            |
| $\phi$                 | ratio of sieving coefficients                                                          | $\Theta_{DOTATATE} / \Theta_{Cr-51-EDTA} = 0.66$                       | unity                              | (11)                           |
| $F_{fil}$              | filtration                                                                             | $GFR_{measured} \cdot \phi^d$                                          | $l \cdot min^{-1}$                 |                                |
| $F_{ex}$               | excretion                                                                              | $F_{fil} \cdot f_{ex}$                                                 | $l \cdot min^{-1}$                 |                                |
| $f_{ex}$               | excretion/filtration                                                                   | 0.98                                                                   | unity                              | (1)                            |
| $k_L$                  | permeability surface area product per unit mass for liver                              | $k_{MUS} \cdot 100$                                                    | $ml \cdot min^{-1} \cdot g^{-1}$   | (12)                           |
| $k_S$                  | permeability surface area product per unit mass for spleen                             | $k_L$ (due to similar capillary structure)                             | $ml \cdot min^{-1} \cdot g^{-1}$   |                                |
| $[R_{L,0}]$            | receptor density liver                                                                 | fitted                                                                 | $nmol \cdot l^{-1}$                |                                |
| $[R_{S,0}]$            | receptor density spleen                                                                | fitted                                                                 | $nmol \cdot l^{-1}$                |                                |
| $[R_{K,0}]$            | receptor density kidneys                                                               | fitted                                                                 | $nmol \cdot l^{-1}$                |                                |
| $\lambda_{L,int}$      | internalization rate sst2 liver                                                        | $\lambda_{K,int}$                                                      | $min^{-1}$                         | (13)                           |

|                       |                                                                     |                                               |                   |         |
|-----------------------|---------------------------------------------------------------------|-----------------------------------------------|-------------------|---------|
| $\lambda_{S,int}$     | internalization rate sst2 spleen                                    | $\lambda_{K,int}$                             | $\text{min}^{-1}$ | (13)    |
| $\lambda_{K,int}$     | internalization rate sst2 kidneys                                   | $\lambda_{TU,int} \cdot 1.7^e$                | $\text{min}^{-1}$ | (13)    |
| $\lambda_{L,release}$ | release rate liver                                                  | $\lambda_{NT,release}$                        | $\text{min}^{-1}$ | (1, 14) |
| $\lambda_{S,release}$ | release rate spleen                                                 | $\lambda_{NT,release}$                        | $\text{min}^{-1}$ | (1)     |
| $\lambda_{K,release}$ | release rate kidneys                                                | $\lambda_{NT,release}$                        | $\text{min}^{-1}$ | (1)     |
|                       |                                                                     |                                               |                   |         |
| <b>Other organs</b>   |                                                                     |                                               |                   |         |
|                       |                                                                     |                                               |                   |         |
| $V_{PRO,total}$       | volume total prostate                                               | $0.016 \cdot \text{BW}/71$                    |                   | (15)    |
| $V_{UT,total}$        | volume total uterus                                                 | $0.080 \cdot \text{BW}/71$                    |                   | (15)    |
| $V_{LU,total}$        | volume total lungs                                                  | $1 \cdot \text{BW}/71$                        |                   | (15)    |
| $V_{AD,total}$        | volume total adrenals                                               | $0.014 \cdot \text{BW}/71$                    |                   | (15)    |
| $V_{MUS,total}$       | volume total muscles                                                | $30.078 \cdot \text{BW}/71$                   |                   | (15)    |
| $V_{GI,total}$        | volume total GI + pancreas                                          | $(0.385+0.548+0.104+0.15) \cdot \text{BW}/71$ |                   | (15)    |
| $V_{SKIN,total}$      | volume total skin                                                   | $3.408 \cdot \text{BW}/71$                    |                   | (15)    |
| $V_{ADI,total}$       | volume total adipose tissue                                         | $13.465 \cdot \text{BW}/71$                   |                   |         |
| $V_{RM,total}$        | volume total red marrow                                             | $1.1 \cdot \text{BW}/71$                      |                   | (15)    |
| $V_{BONE,total}$      | volume total bone without red marrow                                | $10.165 \cdot \text{BW}/71 - V_{RM,total}$    |                   | (15)    |
| $V_{HRT,total}$       | volume total heart                                                  | $0.341 \cdot \text{BW}/71$                    |                   | (15)    |
| $V_{BR,total}$        | volume total brain                                                  | $1.45 \cdot \text{BW}/71$                     |                   | (15)    |
| $V_{BW}$              | volume of total body based on BW                                    | $1 \text{ ml} \triangleq 1 \text{ g}$         |                   |         |
| $V_{REST,total}$      | volume of rest body i = all organs except tumor                     | $V_{BW} - \sum_i V_{i,total}$                 |                   |         |
| $V_{PRO,v}$           | vascular fraction prostate/uterus                                   | $0.04 \cdot (1-H) \cdot V_{PRO,total}$        |                   | (16)    |
| $V_{UT,v}$            | vascular fraction prostate/uterus                                   | $0.07 \cdot (1-H) \cdot V_{UT,total}$         |                   | (17)    |
| $V_{LU,v}$            | vascular (serum) volume lungs                                       | $0.105 \cdot V_P$                             |                   | (4)     |
| $V_{AD,v}$            | vascular (serum) volume adrenals                                    | $0.03 \cdot (1-H) \cdot V_{AD,total}$         |                   | (15)    |
| $V_{MUS,v}$           | vascular (serum) volume muscles                                     | $0.14 \cdot V_P$                              |                   | (4)     |
| $V_{GI,v}$            | vascular (serum) volume GI+ pancreas                                | $0.076 \cdot V_P$                             |                   | (4)     |
| $V_{SKIN,v}$          | vascular(serum) volume skin                                         | $0.03 \cdot V_P$                              |                   | (4)     |
| $V_{ADI,v}$           | vascular(serum) volume adipose tissue                               | $0.05 \cdot V_P$                              |                   | (4)     |
| $V_{RM,v}$            | vascular(serum) volume red marrow                                   | $0.04 \cdot V_P$                              |                   | (4)     |
| $V_{BONE,v}$          | vascular volume bone without red marrow                             | $0.07 \cdot V_P - V_{RM}$                     |                   | (4)     |
| $V_{HRT,v}$           | vascular (serum) volume heart                                       | $0.01 \cdot V_P$                              |                   | (4)     |
| $V_{BR,v}$            | vascular(serum) volume brain                                        | $0.012 \cdot V_P$                             |                   | (4)     |
| $V_{REST,v}$          | serum volume rest i = all organs except tumor                       | $V_P - \sum_i V_{i,v}$                        |                   |         |
| $V_{ART}$             | arterial serum plus ½ serum content of heart                        | $0.06 \cdot V_P + 0.045 \cdot V_P$            |                   | (4)     |
| $V_{VENES}$           | venous serum plus ½ serum content of heart                          | $0.18 \cdot V_P + 0.045 \cdot V_P$            |                   | (4)     |
| $V_{PRO,int}$         | interstitial volume prostate/uterus                                 | $0.25 \cdot V_{PRO,total}$                    |                   | (16)    |
| $V_{UT,int}$          | interstitial volume prostate/uterus                                 | $0.5 \cdot V_{UT,total}$                      |                   | (18)    |
| $V_{LU,int}$          | interstitial volume lungs                                           | $V_{LU,v} \cdot \alpha_{LU}$                  |                   |         |
| $V_{AD,int}$          | interstitial volume adrenals (the value for salivary gland is used) | $0.24 \cdot V_{AD,total}$                     |                   | (19)    |
| $V_{MUS,int}$         | interstitial volume muscles                                         | $V_{MUS,v} \cdot \alpha_{MUS}$                |                   |         |
| $V_{GI,int}$          | interstitial volume GI+ pancreas                                    | $V_{GI,v} \cdot \alpha_{GI}$                  |                   |         |
| $V_{SKIN,int}$        | interstitial volume skin                                            | $V_{SKIN,v} \cdot \alpha_{SKIN}$              |                   |         |
| $V_{ADI,int}$         | interstitial volume adipose tissue                                  | $V_{ADI,v} \cdot \alpha_{ADI}$                |                   |         |
| $V_{RM,int}$          | interstitial volume red marrow                                      | $V_{RM,v} \cdot \alpha_{RM}$                  |                   |         |
| $V_{BONE,int}$        | interstitial volume bone without red marrow                         | $V_{BONE,v} \cdot \alpha_{BONE}$              |                   |         |
| $V_{HRT,int}$         | interstitial volume heart                                           | $V_{HRT,v} \cdot \alpha_{HRT}$                |                   |         |
| $V_{REST,int}$        | volume of rest body                                                 | $V_{REST,v} \cdot \alpha_{REST}$              |                   |         |
| $\alpha_{MUS}$        | ratio of interstitial to vascular volume average man                | $V_{MUS,int}/V_{MUS,v} = 5.9$                 | unity             | (10)    |
| $\alpha_{GI}$         | ratio of interstitial to vascular volume                            | $V_{GI,int}/V_{GI,v} = 8.8$                   | unity             | (10)    |

|                       |                                                                                                            |                                                                                      |                                  |              |
|-----------------------|------------------------------------------------------------------------------------------------------------|--------------------------------------------------------------------------------------|----------------------------------|--------------|
|                       | average man                                                                                                |                                                                                      |                                  |              |
| $\alpha_{SKIN}$       | ratio of interstitial to vascular volume average man                                                       | $V_{SKIN,int}/V_{SKIN,v} = 8.9$                                                      | unity                            | (10)         |
| $\alpha_{ADI}$        | ratio of interstitial to vascular volume average man                                                       | $V_{ADI,int}/V_{ADI,v} = 15.5$                                                       | unity                            | (10)         |
| $\alpha_{RM}$         | ratio of interstitial to vascular volume average man                                                       | $V_{RM,int}/V_{RM,v} = 3.7$                                                          | unity                            | (10)         |
| $\alpha_{HRT}$        | ratio of interstitial to vascular volume average man                                                       | $V_{HRT,int}/V_{HRT,v} = 3.7$                                                        | unity                            | (10)         |
| $\alpha_{LU}$         | ratio of interstitial to vascular volume average man                                                       | $V_{LU,int}/V_{LU,v} = 5.5$                                                          | unity                            | (10)         |
| $\alpha_{BONE}$       | ratio of interstitial to vascular volume average man                                                       | $V_{BONE,int}/V_{BONE,v} = 9.3$                                                      | unity                            | (10)         |
| $\alpha_{REST}$       | ratio of interstitial to vascular volume average man                                                       | $V_{REST,int}/V_{REST,v} = 3.7$                                                      | unity                            | (10)         |
| $f_{PRO}$             |                                                                                                            | 0.18                                                                                 | $ml \cdot min^{-1} \cdot g^{-1}$ | (16)         |
| $f_{UT}$              |                                                                                                            | 1                                                                                    | $ml \cdot min^{-1} \cdot g^{-1}$ | (18)         |
| $f_{AD}$              |                                                                                                            | 6                                                                                    | $ml \cdot min^{-1} \cdot g^{-1}$ | (15)         |
| $F_{PRO}$<br>$F_{UT}$ | Total serum flow to prostate/uterus                                                                        | $f_{PRO} \cdot (1-H) \cdot V_{PRO,total}$<br>$f_{UT} \cdot (1-H) \cdot V_{UT,total}$ | $ml \cdot min^{-1}$              |              |
| $F_{LU}$              | Total serum flow lungs                                                                                     | $F$                                                                                  | $ml \cdot min^{-1}$              | (4)          |
| $F_{AD}$              | Total serum flow to adrenals                                                                               | $f_{AD} \cdot (1-H) \cdot V_{AD,total}$                                              | $ml \cdot min^{-1}$              |              |
| $F_{MUS}$             | Total serum flow to muscle                                                                                 | $0.17 \cdot F$                                                                       | $ml \cdot min^{-1}$              | (4)          |
| $F_{GI}$              | Total serum flow to GI+ pancreas                                                                           | $0.16 \cdot F$                                                                       | $ml \cdot min^{-1}$              | (4)          |
| $F_{SKIN}$            | Total serum flow to skin                                                                                   | $0.05 \cdot F$                                                                       | $ml \cdot min^{-1}$              | (4)          |
| $F_{ADI}$             | Total serum flow to adipose                                                                                | $0.05 \cdot F$                                                                       | $ml \cdot min^{-1}$              | (4)          |
| $F_{RM}$              | Total serum flow to red marrow (RM)                                                                        | $0.03 \cdot F$                                                                       | $ml \cdot min^{-1}$              | (4)          |
| $F_{BONE}$            | Total serum flow to bone (without RM)                                                                      | $0.05 \cdot F$                                                                       | $ml \cdot min^{-1}$              | (4)          |
| $F_{HRT}$             | Total serum flow to heart                                                                                  | $0.04 \cdot F$                                                                       | $ml \cdot min^{-1}$              | (4)          |
| $F_{BR}$              | Total serum flow to brain                                                                                  | $0.12 \cdot F$                                                                       | $ml \cdot min^{-1}$              | (4)          |
| $F_{REST}$            | $i =$ all organs except tumor                                                                              | $F - \sum_i F_i$                                                                     | $ml \cdot min^{-1}$              |              |
| $F_{TOTAL}$           |                                                                                                            | $F + F_{TU,1} + F_{TU,2} + F_{TU,REST}$                                              | $ml \cdot min^{-1}$              |              |
| $PS_i$                | permeability surface area product                                                                          | $k_i \cdot V_{i\ total}$                                                             | $ml \cdot min^{-1}$              |              |
| $k_{PRO}$<br>$k_{UT}$ | permeability surface area product per unit mass (scaled for molecule size of DOTATATE) for prostate/uterus | 0.1<br>0.2                                                                           | $ml \cdot min^{-1} \cdot g^{-1}$ | (16)<br>(18) |
| $k_{LU}$              | permeability surface area product per unit mass for lungs                                                  | $k_{MUS} \cdot 100$                                                                  | $ml \cdot min^{-1} \cdot g^{-1}$ | (12)         |
| $k_{AD}$              | permeability surface area product per unit mass for adrenals                                               | $k_{MUS} \cdot 100$ (assumed to be very high as for salivary glands)                 | $ml \cdot min^{-1} \cdot g^{-1}$ | (20)         |
| $k_{MUS}$             | permeability surface area product per unit mass for muscle                                                 | 0.02                                                                                 | $ml \cdot min^{-1} \cdot g^{-1}$ | (12)         |
| $k_{GI}$              | permeability surface area product per unit mass for GI and pancreas                                        | 0.02<br>(assumed to similar to muscle)                                               | $ml \cdot min^{-1} \cdot g^{-1}$ |              |
| $k_{SKIN}$            | permeability surface area product per unit mass for skin                                                   | 0.02<br>(assumed to similar to muscle)                                               | $ml \cdot min^{-1} \cdot g^{-1}$ |              |
| $k_{ADI}$             | permeability surface area product per unit mass for adipose                                                | 0.02<br>(assumed to similar to muscle)                                               | $ml \cdot min^{-1} \cdot g^{-1}$ |              |
| $k_{RM}$              | permeability surface area product per unit mass for red marrow                                             | $k_L$ (assumed to similar to liver)                                                  | $ml \cdot min^{-1} \cdot g^{-1}$ |              |
| $k_{HRT}$             | permeability surface area product per unit mass for heart                                                  | 0.02<br>(assumed to similar to muscle)                                               | $ml \cdot min^{-1} \cdot g^{-1}$ |              |
| $k_{BONE}$            | permeability surface area product per unit mass for bone                                                   | 0.02<br>(assumed to similar to muscle)                                               | $ml \cdot min^{-1} \cdot g^{-1}$ |              |

|                               |                                                                                  |                                                   |                                  |      |
|-------------------------------|----------------------------------------------------------------------------------|---------------------------------------------------|----------------------------------|------|
| $k_{REST}$                    | permeability surface area product per unit mass for rest                         | 0.02<br>(assumed to similar to muscle)            | $ml \cdot min^{-1} \cdot g^{-1}$ |      |
| $[R_{PRO,0}]$<br>$[R_{UT,0}]$ | receptor density prostate based on sst2 density ratios calculated from (21)      | $[R_{K,0}] \cdot 0.26$<br>$[R_{K,0}] \cdot 0.092$ | $nmol \cdot l^{-1}$              | (21) |
| $[R_{AD,0}]$                  | receptor density adrenals based on sst2 density ratios calculated from (21)      | $[R_{K,0}] \cdot 1.65$                            | $nmol \cdot l^{-1}$              | (21) |
| $[R_{MUS,0}]$                 | receptor density muscle based on sst2 density ratios calculated from (21)        | $[R_{K,0}] \cdot 0.0056$                          | $nmol \cdot l^{-1}$              | (21) |
| $[R_{GI,0}]$                  | receptor density GI + pancreas based on sst2 density ratios calculated from (21) | $[R_{K,0}] \cdot 0.16$                            | $nmol \cdot l^{-1}$              | (21) |
| $[R_{RM,0}]$                  | receptor density RM based on sst2 density ratios calculated from (21)            | $[R_{K,0}] \cdot 0.028$                           | $nmol \cdot l^{-1}$              | (21) |
| $[R_{REST,0}]$                | receptor density rest based on sst2 density ratios calculated from (21)          | fitted                                            | $nmol \cdot l^{-1}$              |      |
| $\lambda_{NT,int}$            | internalization rate for sst2 normal tissue                                      | $\lambda_{K,int}$                                 | $min^{-1}$                       | (22) |
| $\lambda_{NT,release}$        | degradation and release from sst2 cells normal tissue                            | fitted                                            | $min^{-1}$                       | (1)  |
| R                             | receptors free                                                                   |                                                   | nmol                             |      |
| $R_{i,0}$                     | receptors total number of organ i                                                | $[R_{i,0}] \cdot V_{i,total}$                     | nmol                             |      |
| $[R_{i,0}]$                   | receptor density of organ i                                                      |                                                   | $nmol \cdot l^{-1}$              |      |
| $RP_i$                        | peptide bound                                                                    |                                                   | nmol                             |      |
| PPR                           | peptide bound to serum protein                                                   |                                                   | nmol                             |      |
| $k_{PR}$                      | binding rate peptide to serum                                                    | fitted                                            | $min^{-1}$                       |      |
| $P_{intern}$                  | peptide internalized                                                             |                                                   | nmol                             |      |
| $P_{i,v}$                     | peptide free vascular                                                            |                                                   | nmol                             |      |
| $P_{i,int}$                   | peptide free interstitial                                                        |                                                   | nmol                             |      |
| $P_{K,intra}$                 | peptide interacellular kidneys                                                   |                                                   | nmol                             |      |

<sup>a</sup>In house Biacore measurements (23) of PSMA specific peptides yielded typical values of 0.04 1/min. Ferl et al report similar values [1].

<sup>b</sup>For the average normal adult (blood)  $F = 6500 \text{ ml/min}$  and  $V = 5300 \text{ ml}$ . Therefore, a factor of 1.23 was assigned to account for the changes in total serum flow due to volume changes.

<sup>c</sup>It is assumed that 2/3 of the total intracellular volume of the kidney is represented by the proximal tubular cells

<sup>d</sup> Scaling of GFR due to different molecular sizes

<sup>e</sup>The internalization of  $^{111}\text{In-DOTATATE}$  was not directly measured for kidney cells (13). However, in reference (13) the kidney and tumor cell values for other  $^{111}\text{In}$ -labeled ligands are reported. The mean value of the kidney to tumor ratio for these actually measured internalization rates was calculated. This average value of 1.7 was used as the ratio of kidney to the tumor  $^{111}\text{In-DOTATATE}$  internalization rate.



## **2D imaging corrections:**

Background correction, self-attenuation and scatter corrections were performed according to MIRD pamphlet 16 (24) for conjugative view counting. For organ activity estimation, a ROI was placed in an area with no overlapping activity of other organs and then scaled according to the total organ size. The background ROI was placed in the abdomen. For liver metastasis, the liver or abdomen were considered background depending on the size of the lesion.

For red marrow, time activity data could not be directly delineated. The herein used PBPK model allowed including information such as receptor density (according to Boy et al.) in the red marrow. It further allowed simultaneously fitting all parameters to all data (serum, whole body and all organs plus tumor). The time-integrated activity coefficient was estimated by integrating all compartments describing the red marrow including red marrow serum, interstitial space, bound and internalized peptide. For red marrow absorbed dose estimation, see equation 21, below.

## **Absorbed dose (D) and biologically effective dose (BED):**

To calculate the absorbed dose and the BED of the kidneys, tumor, spleen and liver, the following equations and parameter values (Table B) were used:

$$\dot{D}_i(t) = A_i(t) \cdot S_{i \leftarrow i} = A_{inj} \cdot a_i(t) \cdot S_{i \leftarrow i} \quad (14)$$

$$D_i(T) = \int_0^T \dot{D}_i(t) dt = A_{inj} \cdot \tilde{a}_i(T) \cdot S_{i \leftarrow i} \quad (15)$$

The BED (25) is defined as

$$BED_i = D_i \cdot \left(1 + \frac{G_i}{\alpha_i / \beta_i} \cdot D_i\right) \quad (16)$$

The factor  $G_i$  (Lea–Catcheside factor) (25) is defined as

$$G_i(T) = \frac{2}{D_i^2} \cdot \int_0^T \dot{D}_i(t) dt \cdot \int_0^t \dot{D}_i(\omega) \cdot e^{-\mu_i(t-\omega)} d\omega \quad (17)$$

Thus, after inserting Eq. (17) in (16) one obtains

$$BED_i = D_i + \frac{2 \cdot \int_0^T \dot{D}_i(t) dt \cdot \int_0^t \dot{D}_i(\omega) \cdot e^{-\mu_i(t-\omega)} d\omega}{\alpha_i / \beta_i} \quad (18)$$

The activity to administer yielding a fixed kidney  $BED_{K, fixed}$  is calculated according to

$$BED_{K, fixed} = A_{inj, BED_{K, fixed}} \cdot \tilde{a}_K(T) \cdot S_{K \leftarrow K} + \frac{2 \cdot A_{inj, BED_{K, fixed}} \int_0^T a_K(t) \cdot S_{K \leftarrow K} dt \cdot \int_0^t a_K(\omega) \cdot S_{K \leftarrow K} \cdot e^{-\mu_K(t-\omega)} d\omega}{\alpha_K / \beta_K} \quad (19)$$

Solving Eq (19) for the administered activity yields

$$\begin{aligned}
A_{inj, BED_{K, fixed}} &= \frac{-\tilde{a}_K(T) \cdot S_{K \leftarrow K} \pm \sqrt{(\tilde{a}_K(T) \cdot S_{K \leftarrow K})^2 + \frac{8 \cdot \int_0^T a_K(t) \cdot S_{K \leftarrow K} dt \cdot \int_0^t a_K(\omega) \cdot S_{K \leftarrow K} \cdot e^{-\mu_K(t-\omega)} d\omega \cdot BED_{K, fixed}}{\alpha_K / \beta_K}}}{4 \cdot \int_0^T a_K(t) \cdot S_{K \leftarrow K} dt \cdot \int_0^t a_K(\omega) \cdot S_{K \leftarrow K} \cdot e^{-\mu_K(t-\omega)} d\omega} \\
&\quad \alpha_K / \beta_K \\
A_{inj, BED_{K, fixed}} &= \frac{-\tilde{a}_K(T) \pm \sqrt{\tilde{a}_K(T)^2 + \frac{8 \cdot \int_0^T a_K(t) \cdot dt \cdot \int_0^t a_K(\omega) \cdot e^{-\mu_K(t-\omega)} d\omega \cdot BED_{K, fixed}}{\alpha_K / \beta_K}}}{4 \cdot S_{K \leftarrow K} \cdot \int_0^T a_K(t) \cdot dt \cdot \int_0^t a_K(\omega) \cdot e^{-\mu_K(t-\omega)} d\omega} \\
&\quad \alpha_K / \beta_K
\end{aligned} \tag{20}$$

To calculate the BED of the red marrow, equation (21) was used instead of Eq. (14):

$$\dot{D}_{RM} = A_{RM}(t) \cdot S_{RM \leftarrow RM} + A_{REM}(t) \cdot S_{RM \leftarrow REM} \tag{21}$$

**SUPPLEMENTAL TABLE 2**

| Variable                |                                                                                  | Value                                                       | Unit                                                    | Source       |
|-------------------------|----------------------------------------------------------------------------------|-------------------------------------------------------------|---------------------------------------------------------|--------------|
| $S_{K \leftarrow K}$    | dose factor kidney to kidney phantom<br>(are scaled using the actual organ mass) | $2.93 \cdot 10^{-5}$ male<br>$3.18 \cdot 10^{-5}$ female    | $\text{Gy} \cdot \text{min}^{-1} \cdot \text{MBq}^{-1}$ | (26)         |
| $S_{S \leftarrow S}$    | dose factor kidney to kidney phantom<br>(are scaled using the actual organ mass) | $4.76 \cdot 10^{-5}$ male<br>$5.80 \cdot 10^{-5}$ female    | $\text{Gy} \cdot \text{min}^{-1} \cdot \text{MBq}^{-1}$ | (26)         |
| $S_{L \leftarrow L}$    | dose factor kidney to kidney phantom<br>(are scaled using the actual organ mass) | $4.70 \cdot 10^{-6}$ male<br>$6.42 \cdot 10^{-6}$ female    | $\text{Gy} \cdot \text{min}^{-1} \cdot \text{MBq}^{-1}$ | (26)         |
| $S_{TU \leftarrow TU}$  | dose factor tumor to tumor phantom                                               | Table C                                                     | $\text{Gy} \cdot \text{min}^{-1} \cdot \text{MBq}^{-1}$ | (27)         |
| $S_{RM \leftarrow RM}$  | dose factor red marrow to red marrow<br>phantom (are scaled using BW)            | $3.52 \cdot 10^{-6}$ male<br>$3.14 \cdot 10^{-6}$ female    | $\text{Gy} \cdot \text{min}^{-1} \cdot \text{MBq}^{-1}$ | (26)         |
| $S_{RM \leftarrow REM}$ | dose factor remainder to red marrow<br>corrected according to Hindorf et al.     | $8.46 \cdot 10^{-8}$ male<br>$1.03 \cdot 10^{-7}$ female    | $\text{Gy} \cdot \text{min}^{-1} \cdot \text{MBq}^{-1}$ | (26)<br>(28) |
| $\alpha/\beta_K$        | radiobiological parameters kidneys                                               | 2.5                                                         | Gy                                                      | (29)         |
| $\mu_K$                 | repair rate kidney                                                               | $\ln(2)/60/2.8$                                             | $\text{min}^{-1}$                                       | (29)         |
| $\alpha/\beta_S$        | radiobiological parameters spleen                                                | $\alpha/\beta_K$                                            | Gy                                                      |              |
| $\mu_S$                 | repair rate spleen                                                               | $\mu_K$                                                     | $\text{min}^{-1}$                                       | (29)         |
| $\alpha/\beta_L$        | radiobiological parameters liver                                                 | $\alpha/\beta_K$                                            | Gy                                                      |              |
| $\mu_L$                 | repair rate liver                                                                | $\mu_K$                                                     | $\text{min}^{-1}$                                       |              |
| $\alpha/\beta_{TU}$     | radiobiological parameters tumor                                                 | 10                                                          | Gy                                                      | (30)         |
| $\mu_{TU}$              | repair rate tumor                                                                | $\ln(2)/60/1$                                               | $\text{min}^{-1}$                                       | (30)         |
| $\alpha/\beta_{RM}$     | radiobiological parameters red marrow                                            | 15                                                          | Gy                                                      | (31)         |
| $\mu_{RM}$              | repair rate red marrow                                                           | $\ln(2)/60/1.5$                                             | $\text{min}^{-1}$                                       | (31)         |
| $A_i$                   | activity of organ i                                                              |                                                             | MBq                                                     |              |
| $A_{REM}$               | activity of remainder                                                            | $A_{\text{Total}} - A_{TU} - A_L$<br>$- A_S - A_K - A_{RM}$ | MBq                                                     |              |
| $A_{inj}$               | injected activity                                                                |                                                             | MBq                                                     |              |
| $A_{inj, BED K, fixed}$ | activity to inject for $BED_K = 20 \text{ Gy}$                                   |                                                             | MBq                                                     |              |
| $\tilde{a}_i$           | time-integrated activity coefficient of organ i                                  |                                                             | h                                                       |              |
| $a_i$                   | fraction of administered activity of organ i                                     |                                                             | unity                                                   |              |
| $D_i$                   | absorbed dose to organ i                                                         |                                                             | Gy                                                      |              |
| $\dot{D}_i$             | absorbed dose rate to organ i                                                    |                                                             | $\text{Gy} \cdot \text{min}^{-1}$                       |              |
| $T$                     | Integration time                                                                 | 30000                                                       | min                                                     |              |
| $G_i$                   | Lea–Catcheside factor of organ i                                                 |                                                             | unity                                                   | (30)         |
| $BED_i$                 | biologically effective dose to organ i                                           |                                                             | Gy                                                      | (30)         |

### SUPPLEMENTAL TABLE 3

| Volume [ml] | Tumor dose factors<br>[Gy·min <sup>-1</sup> ·MBq <sup>-1</sup> ] |
|-------------|------------------------------------------------------------------|
| 0.5         | 1.27·10 <sup>-2</sup>                                            |
| 2           | 3.64·10 <sup>-3</sup>                                            |
| 2.8         | 2.50·10 <sup>-3</sup>                                            |
| 3           | 2.40·10 <sup>-3</sup>                                            |
| 4           | 1.90·10 <sup>-3</sup>                                            |
| 20          | 4.08·10 <sup>-4</sup>                                            |
| 23          | 3.50·10 <sup>-4</sup>                                            |
| 30          | 2.80·10 <sup>-4</sup>                                            |
| 87          | 9.00·10 <sup>-5</sup>                                            |
| 111         | 8.00·10 <sup>-5</sup>                                            |
| 116         | 7.80·10 <sup>-5</sup>                                            |
| 2522        | 3.50·10 <sup>-6</sup>                                            |

### References

1. Kletting P, Muller B, Erentok B, Schmaljohann J, Behrendt FF, Reske SN, et al. Differences in predicted and actually absorbed doses in peptide receptor radionuclide therapy. *Med Phys*. 2012;39(9):5708-17. Epub 2012/09/11.
2. Rippe B, Haraldsson B. Fluid and protein fluxes across small and large pores in the microvasculature. Application of two-pore equations. *acta Physiol Scand*. 1987;131(3):411-28.
3. Ferl GZ, Dumont RA, Hildebrandt IJ, Armijo A, Haubner R, Reischl G, et al. Derivation of a Compartmental Model for Quantifying 64Cu-DOTA-RGD Kinetics in Tumor-Bearing Mice. *J Nucl Med*. 2009;50(2):250-8.
4. Leggett RW, Williams LR. A proposed blood circulation model for reference man. *Health Phys*. 1995;69(2):187-201.
5. Buchmann I, Kull T, Glatting G, Bunjes D, Hale G, Kotzerke J, et al. A comparison of the biodistribution and biokinetics of 99mTc-anti-CD66 mAb BW 250/183 and 99mTc-anti-CD45 mAb YTH 24.5 with regard to suitability for myeloablative radioimmunotherapy. *Eur J Nucl Med Mol Imaging*. 2003;30(5):667-73.
6. Jain RK. Transport of molecules in the tumor interstitium: a review. *Cancer Res*. 1987;47(12):3039-51.
7. Ludemann L, Grieger W, Wurm R, Wust P, Zimmer C. Quantitative measurement of leakage volume and permeability in gliomas, meningiomas and brain metastases with dynamic contrast-enhanced MRI. *Magn Reson Imaging*. 2005;23(8):833-41. Epub 2005/11/09.
8. Guyennon A, Mihaila M, Palma J, Lombard-Bohas C, Chayvialle JA, Pilleul F. Perfusion characterization of liver metastases from endocrine tumors: Computed tomography perfusion. *World journal of radiology*. 2010;2(11):449-54. Epub 2010/12/24.
9. Kimura H, Takeuchi H, Koshimoto Y, Arishima H, Uematsu H, Kawamura Y, et al. Perfusion imaging of meningioma by using continuous arterial spin-labeling: comparison with dynamic susceptibility-weighted contrast-enhanced MR images and histopathologic features. *AJNR Am J Neuroradiol*. 2006;27(1):85-93. Epub 2006/01/19.

10. Shah DK, Betts AM. Towards a platform PBPK model to characterize the plasma and tissue disposition of monoclonal antibodies in preclinical species and human. *J Pharmacokinet Pharmacodyn*. 2012;39(1):67-86. Epub 2011/12/07.
11. Schmidt MM, Wittrup KD. A modeling analysis of the effects of molecular size and binding affinity on tumor targeting. *Mol Cancer Ther*. 2009;8(10):2861-71.
12. Groothuis DR. The blood-brain and blood-tumor barriers: a review of strategies for increasing drug delivery. *Neuro-oncology*. 2000;2(1):45-59. Epub 2001/04/17.
13. Antunes P, Ginj M, Zhang H, Waser B, Baum RP, Reubi JC, et al. Are radiogallium-labelled DOTA-conjugated somatostatin analogues superior to those labelled with other radiometals? *Eur J Nucl Med Mol Imaging*. 2007;34(7):982-93.
14. Velikyan I, Sundin A, Eriksson B, Lundqvist H, Sorensen J, Bergstrom M, et al. In vivo binding of [68Ga]-DOTATOC to somatostatin receptors in neuroendocrine tumours--impact of peptide mass. *Nucl Med Biol*. 2010;37(3):265-75.
15. Snyder WS, Cook MJ, Nasset ES, Karhausen RS, Howells GP. Report of the Task Group on Reference Man. ICRP publication 23. Oxford: Elsevier; 1975.
16. Buckley DL, Roberts C, Parker GJ, Logue JP, Hutchinson CE. Prostate cancer: evaluation of vascular characteristics with dynamic contrast-enhanced T1-weighted MR imaging--initial experience. *Radiology*. 2004;233(3):709-15. Epub 2004/10/23.
17. Lotgering FK, Gilbert RD, Longo LD. Exercise responses in pregnant sheep: oxygen consumption, uterine blood flow, and blood volume. *Journal of applied physiology: respiratory, environmental and exercise physiology*. 1983;55(3):834-41. Epub 1983/09/01.
18. McRae AC, Heap RB. Uterine vascular permeability, blood flow and extracellular fluid space during implantation in rats. *Journal of reproduction and fertility*. 1988;82(2):617-25. Epub 1988/03/01.
19. Berggreen E, Wiig H. Lowering of interstitial fluid pressure in rat submandibular gland: a novel mechanism in saliva secretion. *American journal of physiology Heart and circulatory physiology*. 2006;290(4):H1460-8. Epub 2005/11/15.
20. Clough G, Smaje LH. Exchange area and surface properties of the microvasculature of the rabbit submandibular gland following duct ligation. *The Journal of physiology*. 1984;354:445-56. Epub 1984/09/01.
21. Boy C, Heusner TA, Poeppel TD, Redmann-Bischofs A, Unger N, Jentzen W, et al. (68)Ga-DOTATOC PET/CT and somatostatin receptor (sst1-sst5) expression in normal human tissue: correlation of sst2 mRNA and SUV(max). *Eur J Nucl Med Mol Imaging*. 2011;38(7):1224-36.
22. Hofland LJ, Lamberts SW. The Pathophysiological Consequences of Somatostatin Receptor Internalization and Resistance. *Endocrine Reviews*. 2003;24(1):28-47.
23. Winter G, Baur B, Andreolli E, Kull T, Witulla B, Solbach C, et al. Biological evaluation of the new glutamate-urea-based PSMA ligand Df-DUPA-Pep. *Eur J Nucl Med Mol Imaging*. 2013;40:S184-S5.
24. Siegel JA, Thomas SR, Stubbs JB, Stabin MG, Hays MT, Koral KF, et al. MIRD pamphlet no. 16: Techniques for quantitative radiopharmaceutical biodistribution data acquisition and analysis for use in human radiation dose estimates. *J Nucl Med*. 1999;40(2):37S-61S.
25. Hobbs RF, Sgouros G. Calculation of the biological effective dose for piecewise defined dose-rate fits. *Med Phys*. 2009;36(3):904-7.
26. Stabin MG, Sparks RB, Crowe E. OLINDA/EXM: The Second-Generation Personal Computer Software for Internal Dose Assessment in Nuclear Medicine. *J Nucl Med*. 2005;46(6):1023-7.
27. Stabin MG, Siegel JA. Physical models and dose factors for use in internal dose assessment. *Health Phys*. 2003;85(3):294-310.
28. Hindorf C, Glatting G, Chiesa C, Lindén O, Flux G. EANM Dosimetry Committee guidelines for bone marrow and whole-body dosimetry. *Eur J Nucl Med Mol Imaging*. 2010;37(6):1238-50.
29. Cremonesi M, Botta F, Di Dia A, Ferrari M, Bodei L, De Cicco C, et al. Dosimetry for treatment with radiolabelled somatostatin analogues. A review. *Q J Nucl Med Mol Imaging*. 2010;54(1):37-51. Epub 2010/02/20.
30. Konijnenberg M. From imaging to dosimetry and biological effects. *Q J Nucl Med Mol Imaging*. 2011;55(1):44-56. Epub 2011/03/10.
31. Dale RG. The application of the linear-quadratic dose-effect equation to fractionated and protracted radiotherapy. *Br J Radiol*. 1985;58(690):515-28.

## **PBPK Model compartments**

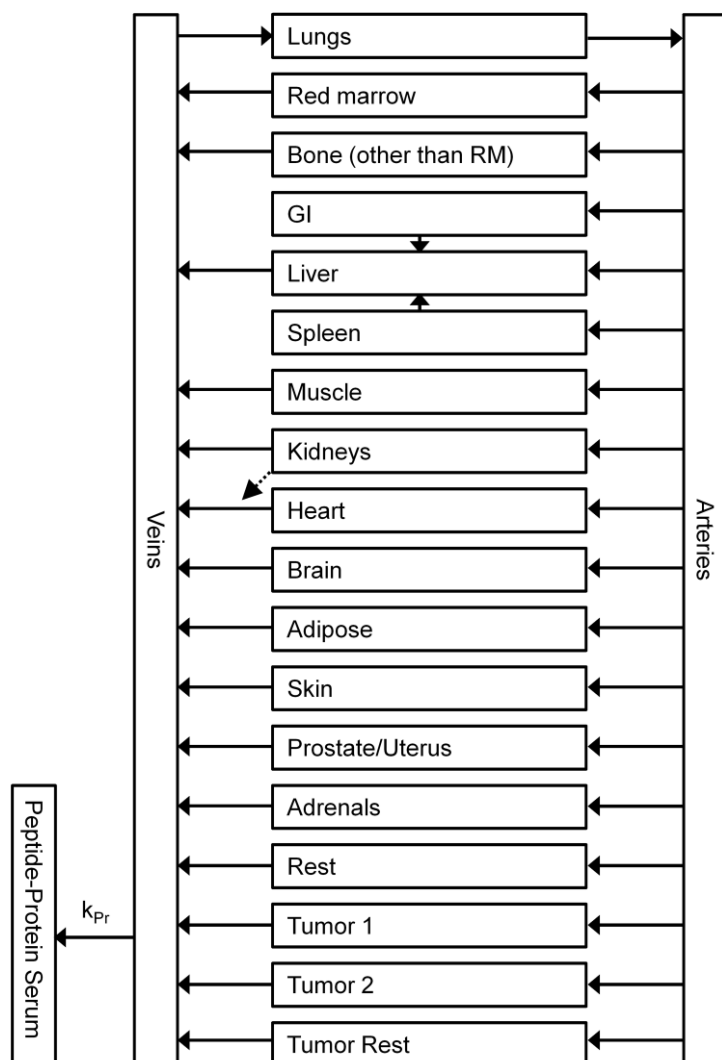

**SUPPLEMENTAL FIGURE 1: Main model structure:** All organs are represented by a rectangular compartment and are connected via blood flow. Each organ within this model, except arteries, veins, brain and protein serum, is divided into sub-compartments. The substance is cleared via kidneys. The compartment “Peptide-Protein serum” contains peptide bound to serum protein. As the fraction of bound peptide to proteins compared to the total amount is small and to reduce the complexity, only the „veins“ were connected to this compartment. The corresponding fraction for each specific organ was considered in the fitting process by assigning the data to the specific compartments.

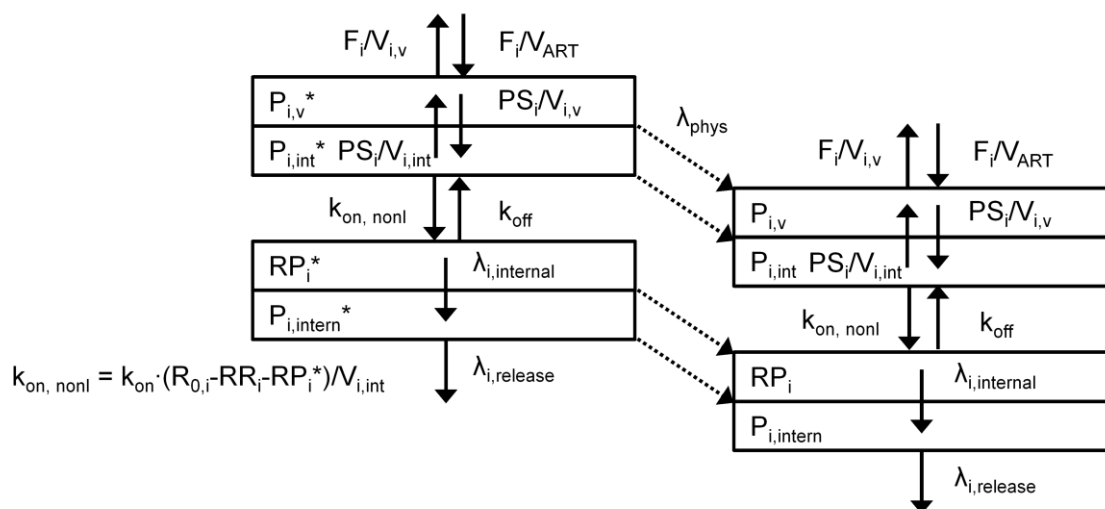

**SUPPLEMENTAL FIGURE 2a: Red marrow, GI, spleen, muscle, prostate (uterus), adrenals, rest and tumor:** The entire model consists of two systems, one for labeled (with \*) and one for unlabeled peptide. The systems are connected by the competition for free receptors ( $k_{on, nonl} = k_{on} \cdot (R_{0,i} - RR_i - RP_i^*) / V_{i,int}$ ) and by the physical decay ( $\lambda_{phys}$ ). All physiological parameters are assumed equal for the labeled and unlabeled substance.  $k_{off}$  is the dissociation rate, the transport of peptide via serum flow to organ is described by  $F_i/V_{ART}$  (where  $F_i$  is serum flow and  $V_{ART}$  is serum volume of the arteries).  $F_i/V_{i,v}$  describes the transport of peptide via serum flow out of organ.  $V_{i,v}$  is the serum volume of the respective organ.  $RP_i$  is sst2 specific bound peptide to the cell surface.  $P_{i,v}$  and  $P_{i,int}$  are free peptide of the vascular ( $V_{i,v}$ ) and interstitial space ( $V_{i,int}$ ), respectively.  $PS_i$  is the permeability surface area product.  $\lambda_{i,internal}$  is the internalisation rate of bound peptide and  $\lambda_{i,release}$  the release rate of  $^{111}In$  (and degraded peptide) from the cell.



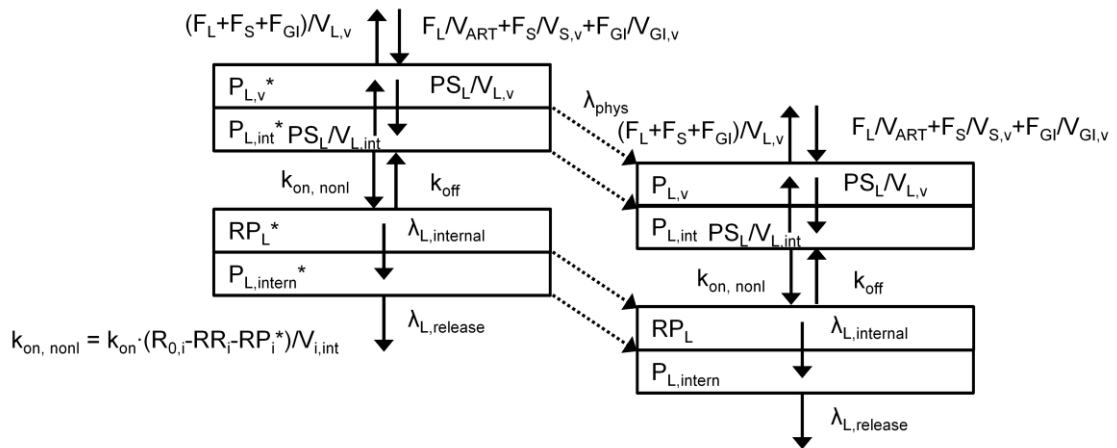

**SUPPLEMENTAL FIGURE 2b: Liver:** For the liver, the model description of Figure 2a applies but the plasma flow is composed of liver arterial, GI and spleen flow.

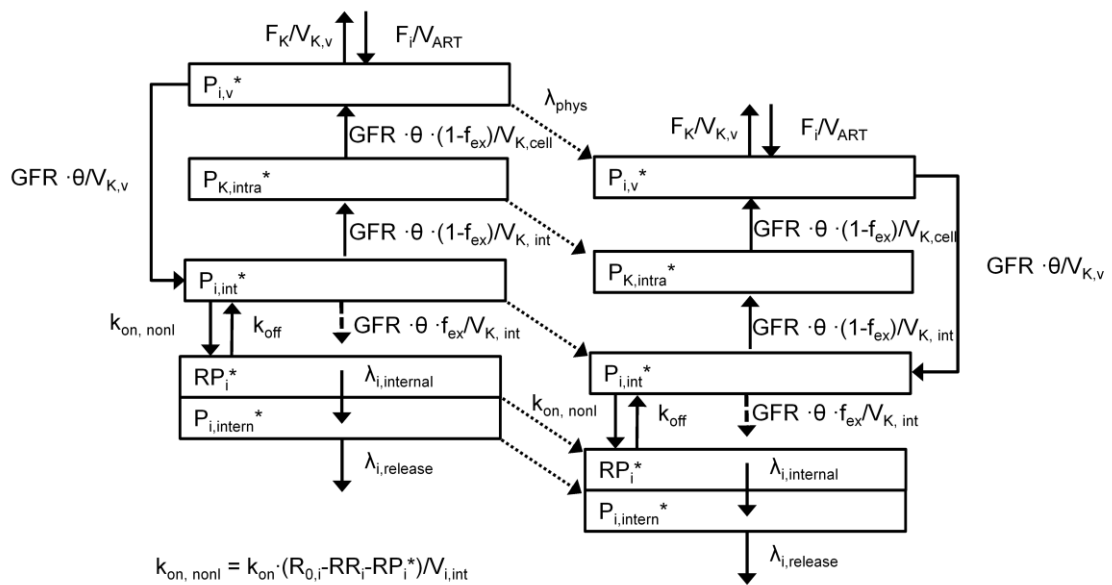

**SUPPLEMENTAL FIGURE 2c: Kidneys:** The peptide is transported via serum flow to the vascular compartment and then filtrated into the interstitial part. Due to the administration of amino acids the largest fraction ( $f_{ex} = 0.98$ , Table A) of peptide is excreted. All unspecific uptake mechanisms are modelled with flow  $GFR \cdot \theta \cdot (1-f_{ex})$  in and out of kidney cells.

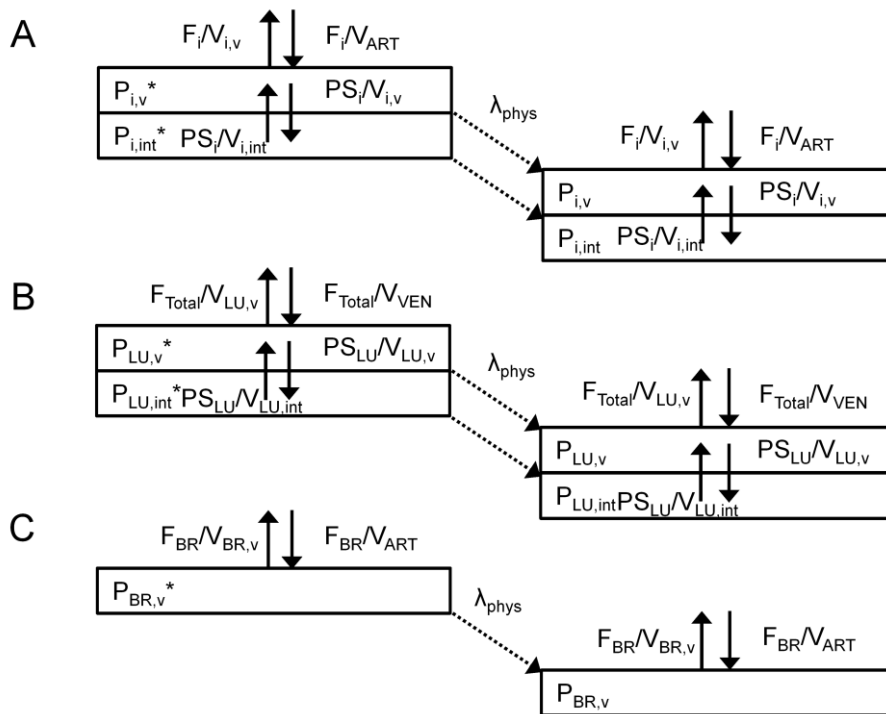

**SUPPLEMENTAL FIGURE 3: sst2 negative tissue and brain:** For adipose, bone (other than red marrow), skin, heart (A) and lung (B), the model on the organ level simplifies to the transport of peptide via serum flow and transcapillary extravasation. For brain (C) the model reduces to serum flow.

# Supplemental Data. Fitted curves and estimated parameters

| Patient | Measurements and Modell | Number of data points | Akaike weight | $[R_{K,0}]$ | $[R_{S,0}]$ | $[R_{L,0}]$ | $[R_{REST,0}]$ | $[R_{TU1,0}]$ | $[R_{TU2,0}]$ | $\lambda_{NT,release}$                 | $\lambda_{TU1,release}$ | $\lambda_{TU2,release}$ | $V_{TUMOR,total}$ | $f_{TU1}$                               | $f_{TU2}$ | $k_{PR}$                               |
|---------|-------------------------|-----------------------|---------------|-------------|-------------|-------------|----------------|---------------|---------------|----------------------------------------|-------------------------|-------------------------|-------------------|-----------------------------------------|-----------|----------------------------------------|
|         |                         |                       | [unity]       | [nmol/L]    |             |             |                |               |               | [min <sup>-1</sup> ·10 <sup>-4</sup> ] |                         |                         | [L]               | [ml min <sup>-1</sup> g <sup>-1</sup> ] |           | [min <sup>-1</sup> ·10 <sup>-4</sup> ] |
| P1      | N1 M3                   | 39                    | 1             | 6.5         | 8.7         | 1.4         | 0.5            | 15            | 9.2           | 0.7                                    | 1.1                     | 1.8                     | -                 | 0.10                                    | 0.20      | 4.7                                    |
|         | N2 M3                   | 39                    | 1             | 8.8         | 11          | 2.5         | 0.5            | 18            | 11            | 0.7                                    | 1.1                     | 1.8                     | -                 | 0.10                                    | 0.20      | 5.6                                    |
|         | N3 M3                   | 39                    | 1             | 7.3         | 9.2         | 2.0         | 0.5            | 17            | 12            | 0.7                                    | 1.1                     | 1.8                     | -                 | 0.1                                     | 0.2       | 3.8                                    |
| P2      | N4 M3                   | 34                    | 1             | 5.7         | 7.8         | 1.0         | 0.4            | 24            | -             | 1.1                                    | 1.7                     | -                       | -                 | 0.10                                    | -         | 4.3                                    |
|         | N5 M3                   | 34                    | 1             | 5.7         | 7.8         | 1.0         | 0.4            | 24            | -             | 0.5                                    | 1.7                     | -                       | -                 | 0.10                                    | -         | 4.3                                    |
| P3      | N6 M1                   | 38                    | 1             | 6.2         | 17          | 0.9         | 0.4            | 5.0           | 34            | 0.5                                    | 3.0                     | 1.7                     | -                 | 0.90                                    | 0.90      | 4.0                                    |
| P4      | N7 M1                   | 34                    | 1             | 8.8         | 12          | 1.1         | 0.9            | 30            | -             | 1.7                                    | 2.1                     | 2.1                     | -                 | 1.00                                    | 1.00      | 2.1                                    |
| P5      | N8 M2                   | 29                    | 0.8           | 7.1         | 13          | 1.2         | 0.5 fixed      | 29            | -             | 2.1                                    | 0.0                     | 0.0                     | 0 fixed           | 0.10                                    | -         | 24                                     |
|         | N8 M3                   | 29                    | 0.2           | 7.1         | 13          | 1.2         | 0.5 fixed      | 27            | -             | 2.3                                    | 0.0                     | 0.0                     | 0 fixed           | 0.11                                    | -         | 23                                     |
| P6      | N9 M1                   | 32                    | 1             | 7.5         | -           | 1.5         | 0.5 fixed      | 19            | 35            | 1.2                                    | 2.0                     | 1.1                     | 0.1               | 1.0                                     | 1.0       | 17                                     |
| P7      | N10 M3                  | 39                    | 1             | 2.8         | 3.9         | 1.1         | 0.5 fixed      | 11            | 7             | 1.2                                    | 0.0                     | 0.0                     | 0.0               | 0.03                                    | 0.02      | 10                                     |
| P8      | N11 M3                  | 39                    | 1             | 2.3         | 4.7         | 0.6         | 0.5 fixed      | 16            | 25            | 0.6                                    | 0.0                     | 0.0                     | 0.2               | 0.02                                    | 1.00      | 10                                     |
| P9      | N12 M3                  | 39                    | 1             | 8.7         | 18          | 2.1         | 0.5 fixed      | 14            | 7             | 1.4                                    | 2.1                     | 0.8                     | 1.2               | 0.06                                    | 0.03      | 17                                     |

The relative SD of all parameters were < 50%. All elements of the correlation matrix were < 0.8.

For patient 1 (N1-3) and 2 (N4-5) an iterative two-stage parametric population fit using all pre-therapeutic measurements for parameter estimation was conducted. The total tumor volume could be delineated for meningioma but not for patients with metastasizing NETs. Therefore, the models were first fitted to time activity data of meningioma patients. The estimated value for the receptor concentration of the remaining tissue,  $[R_{REST,0}]$  was then used as a fixed value for the individual fitting of the NET patients. Thus, the additional tumor volume (other than the explicitly delineated lesions) was estimated. For patient 5 also the average liver receptor concentration was fixed, because the high tumor load did not allow to distinguish between normal and tumor tissue in liver.

Preliminary fits showed that the internalization rates of kidney, liver and spleen were similar and in the order of  $10^{-3}$ . To reduce parameter correlation, the kidney and tumor internalization rate were fixed to  $\lambda_{K,int} = 0.0017 \text{ min}^{-1}$  and  $\lambda_{TU,int} = 0.001 \text{ min}^{-1}$ , respectively. A sensitivity analysis (Supplement D) showed little influence of these assumptions on the results.

The overall error (bias and uncertainty) of the data could not be determined. However, the estimated relative standard error within the data was < 10 % for all curves except for the serum measurements of data set N1 and N5.

1A

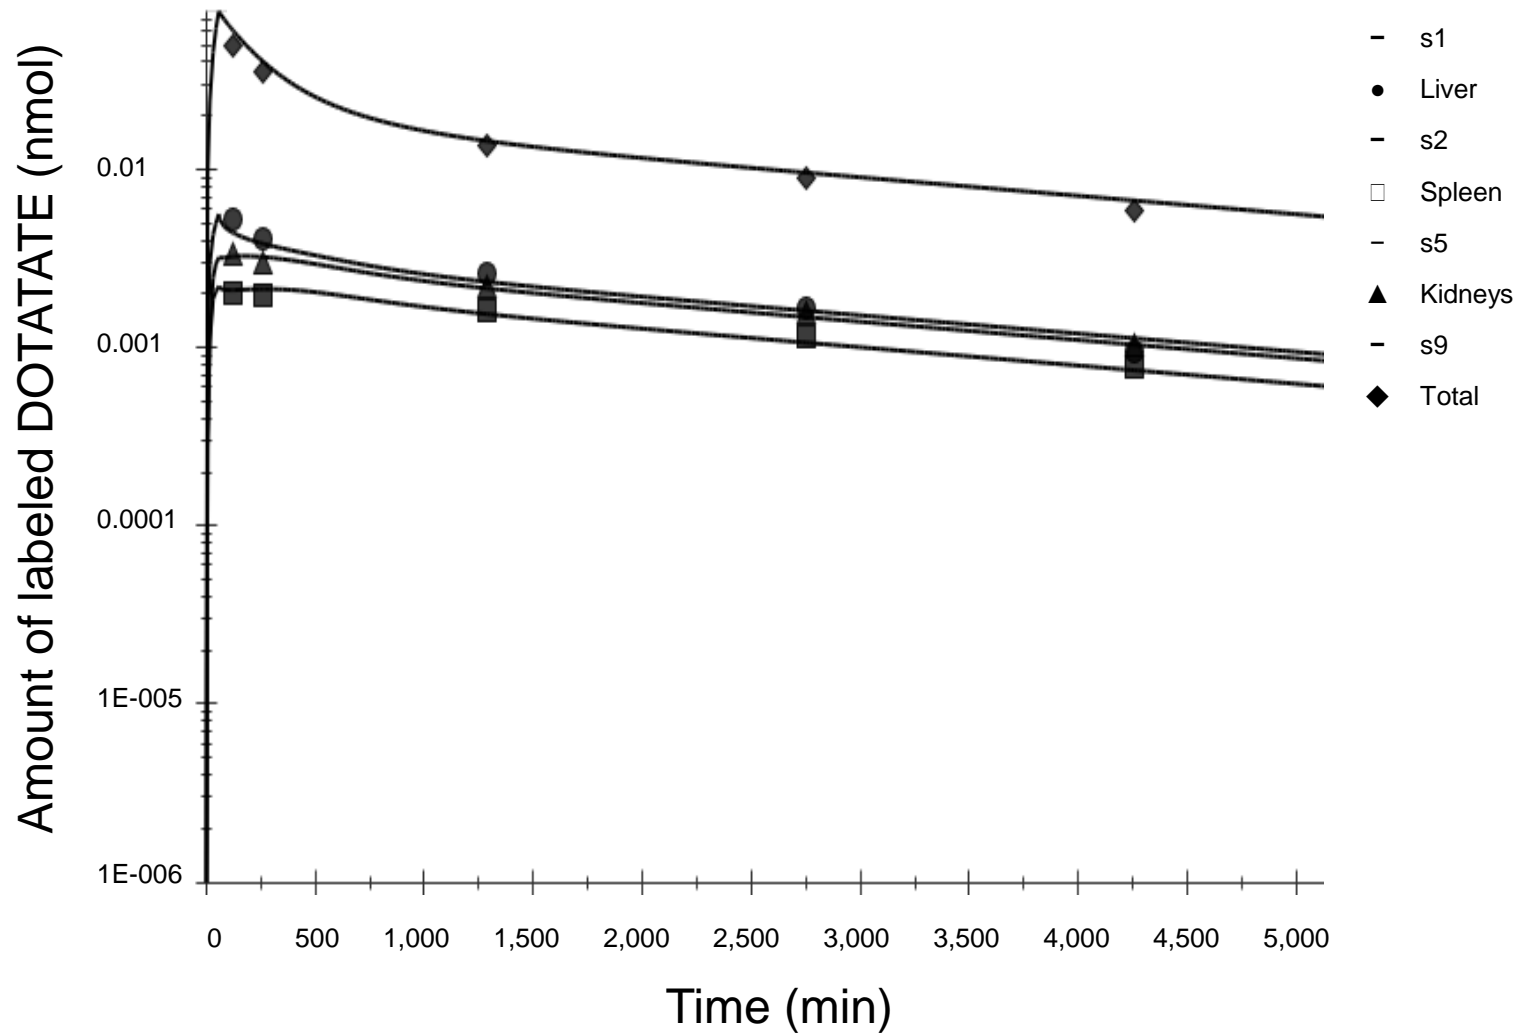

1B

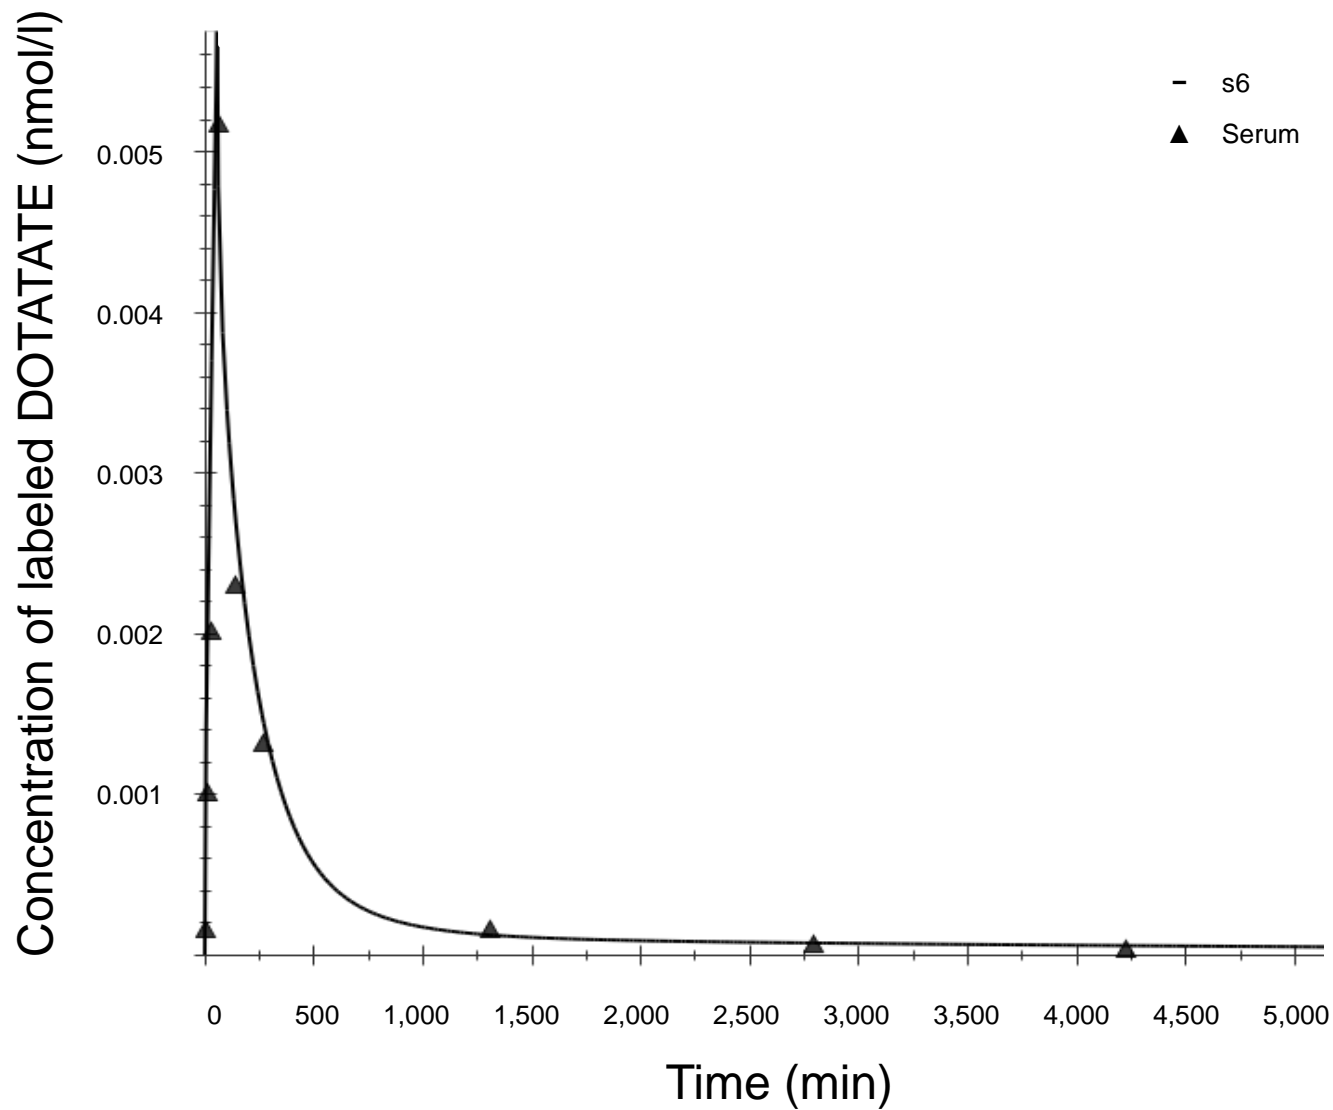

1C

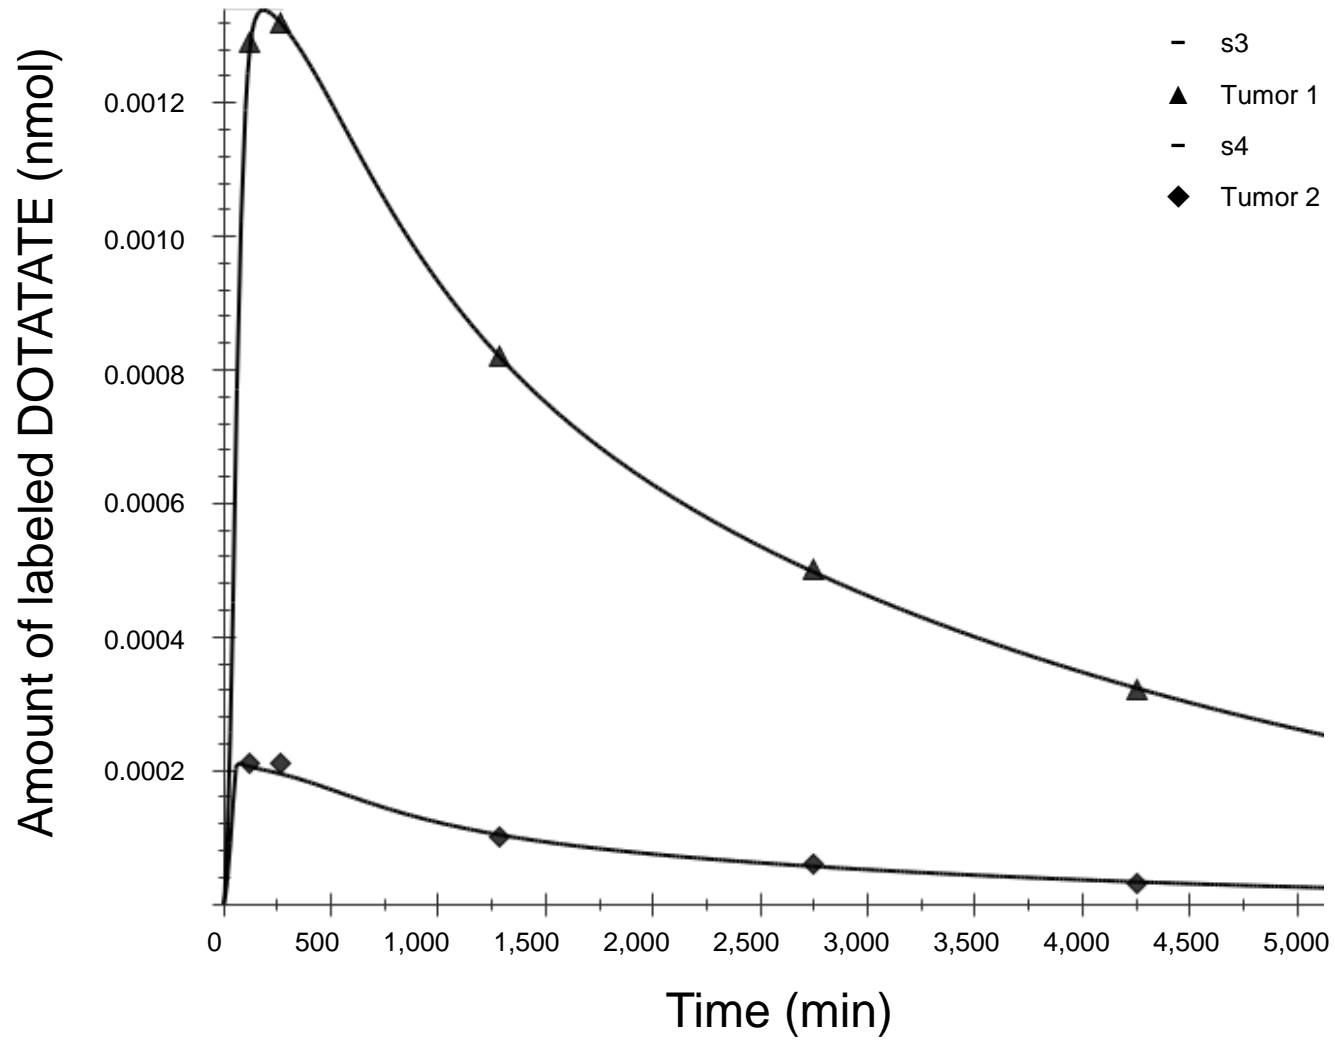

2A

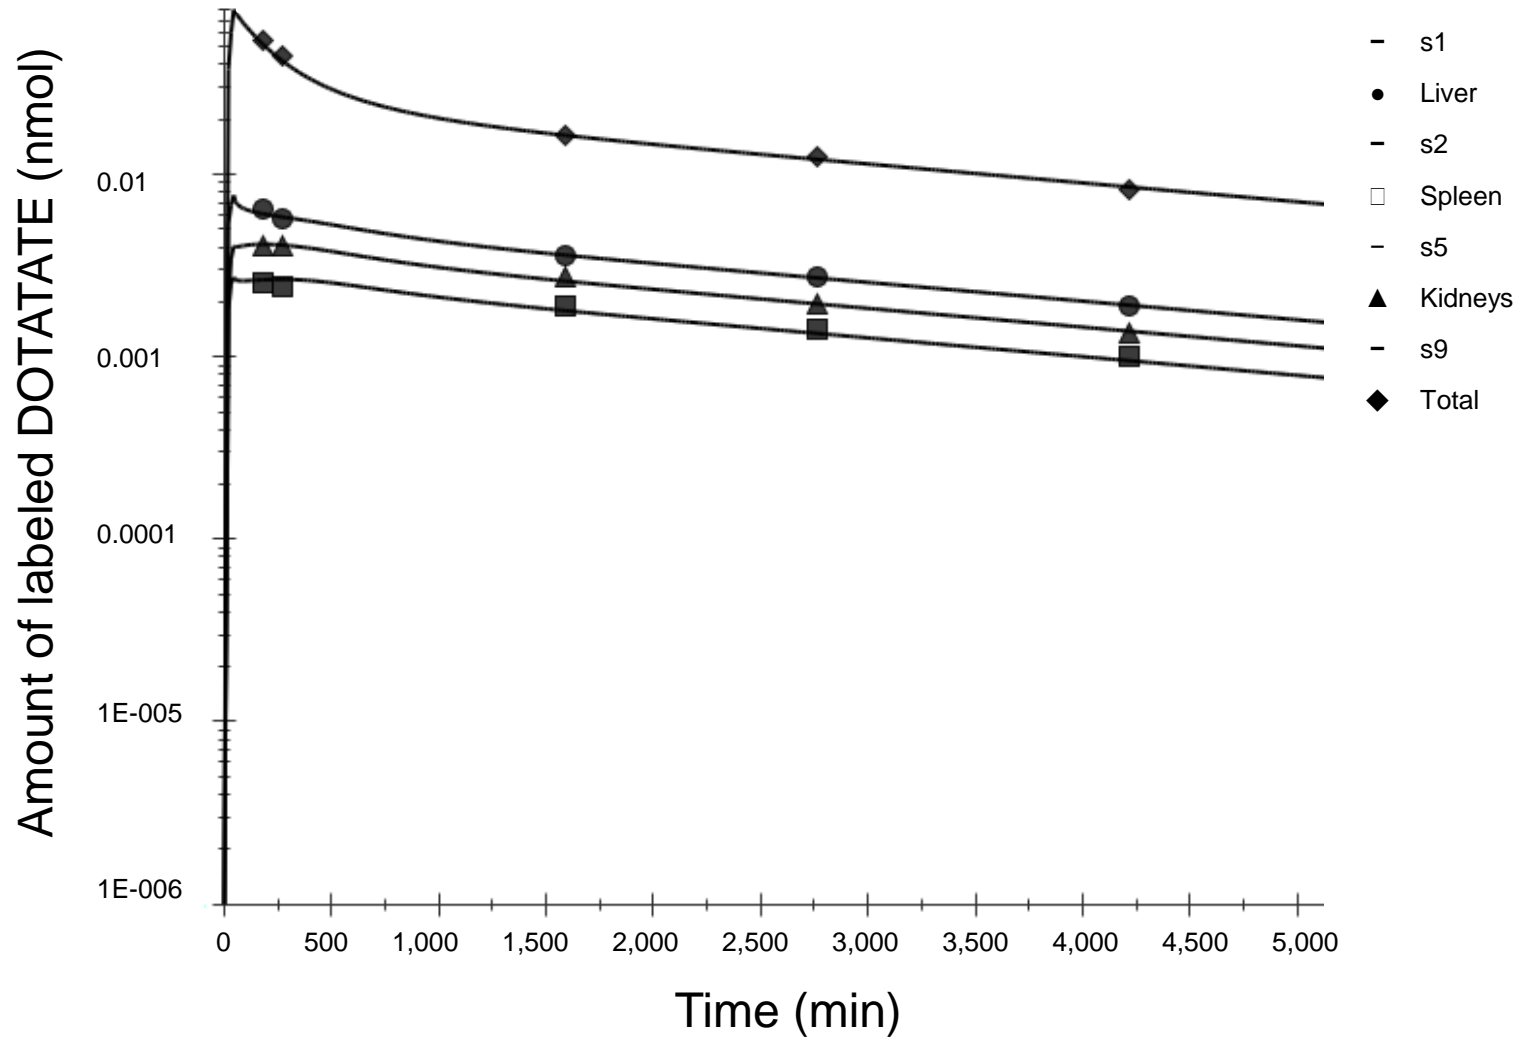



2B

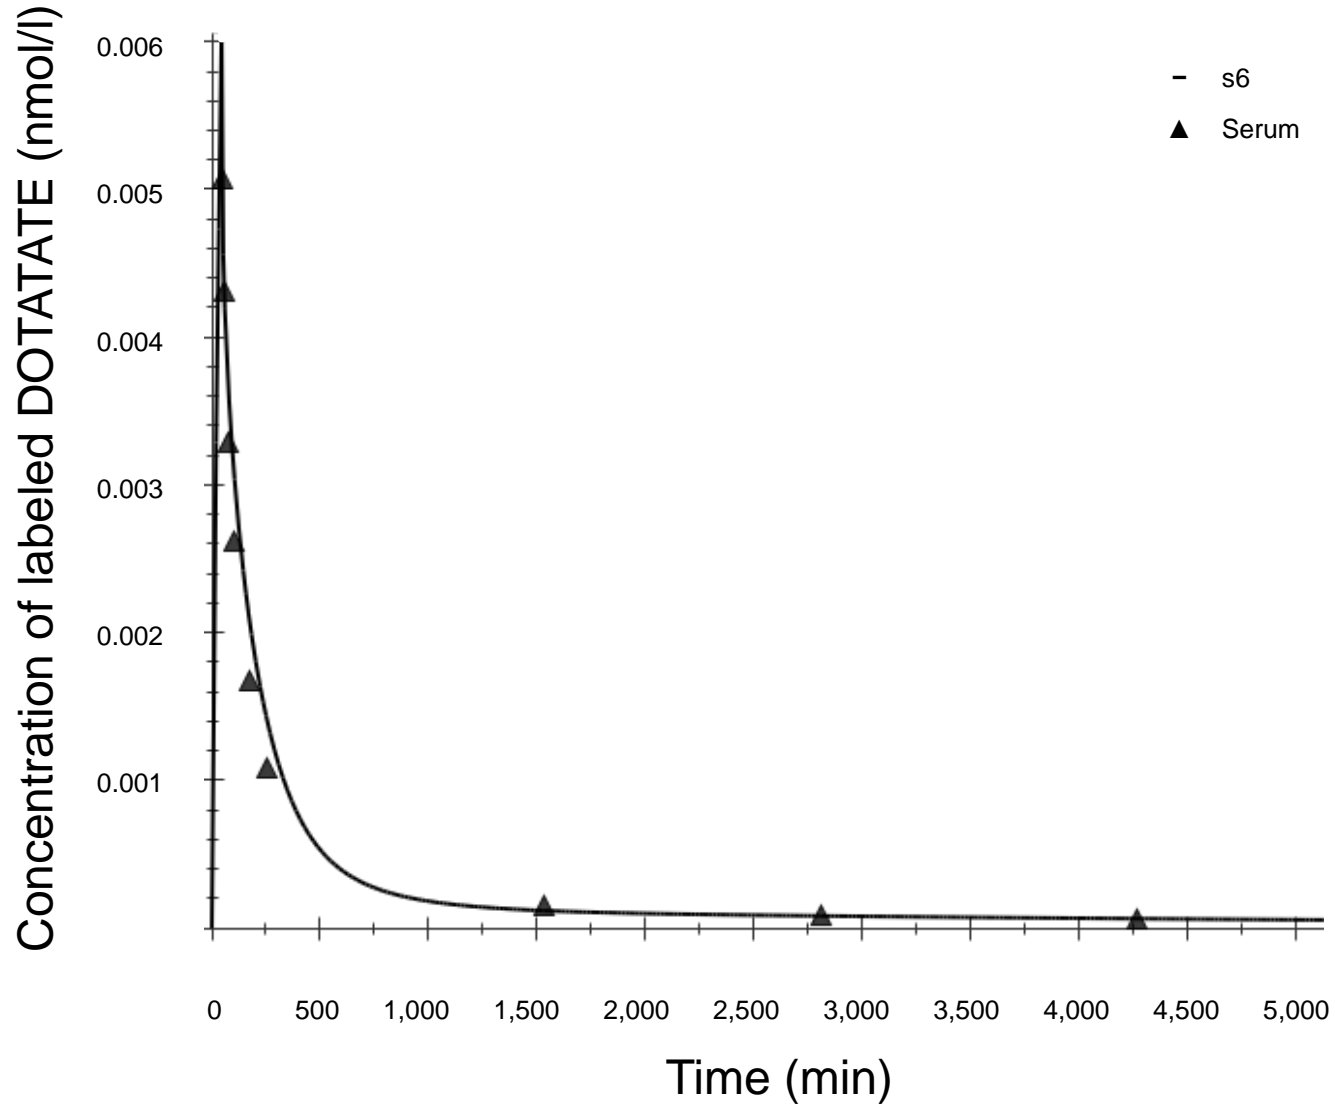

2C

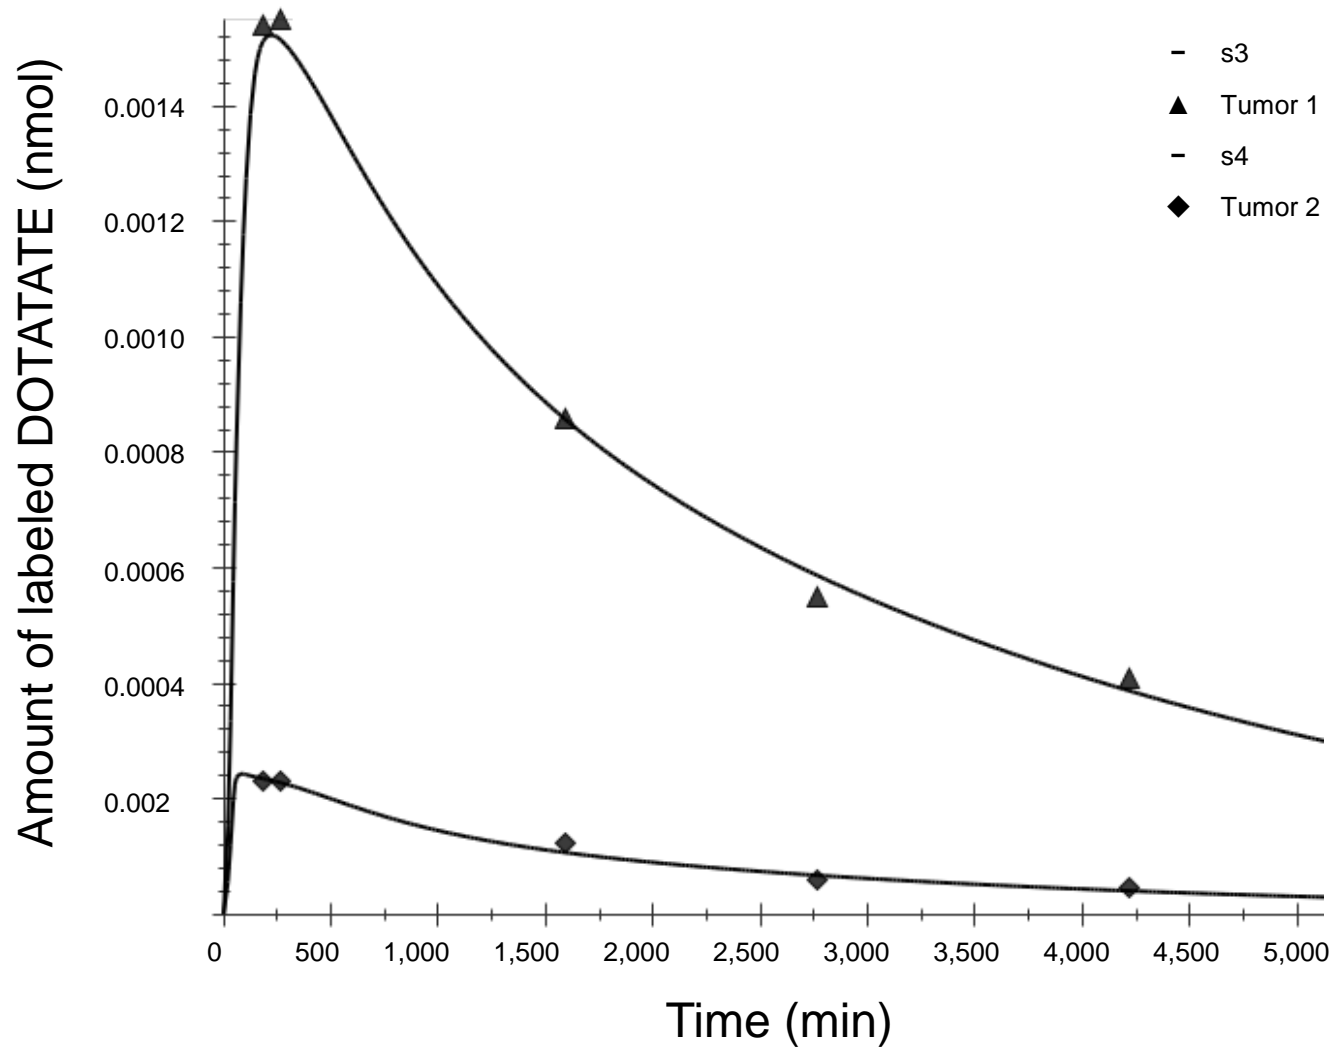

3A

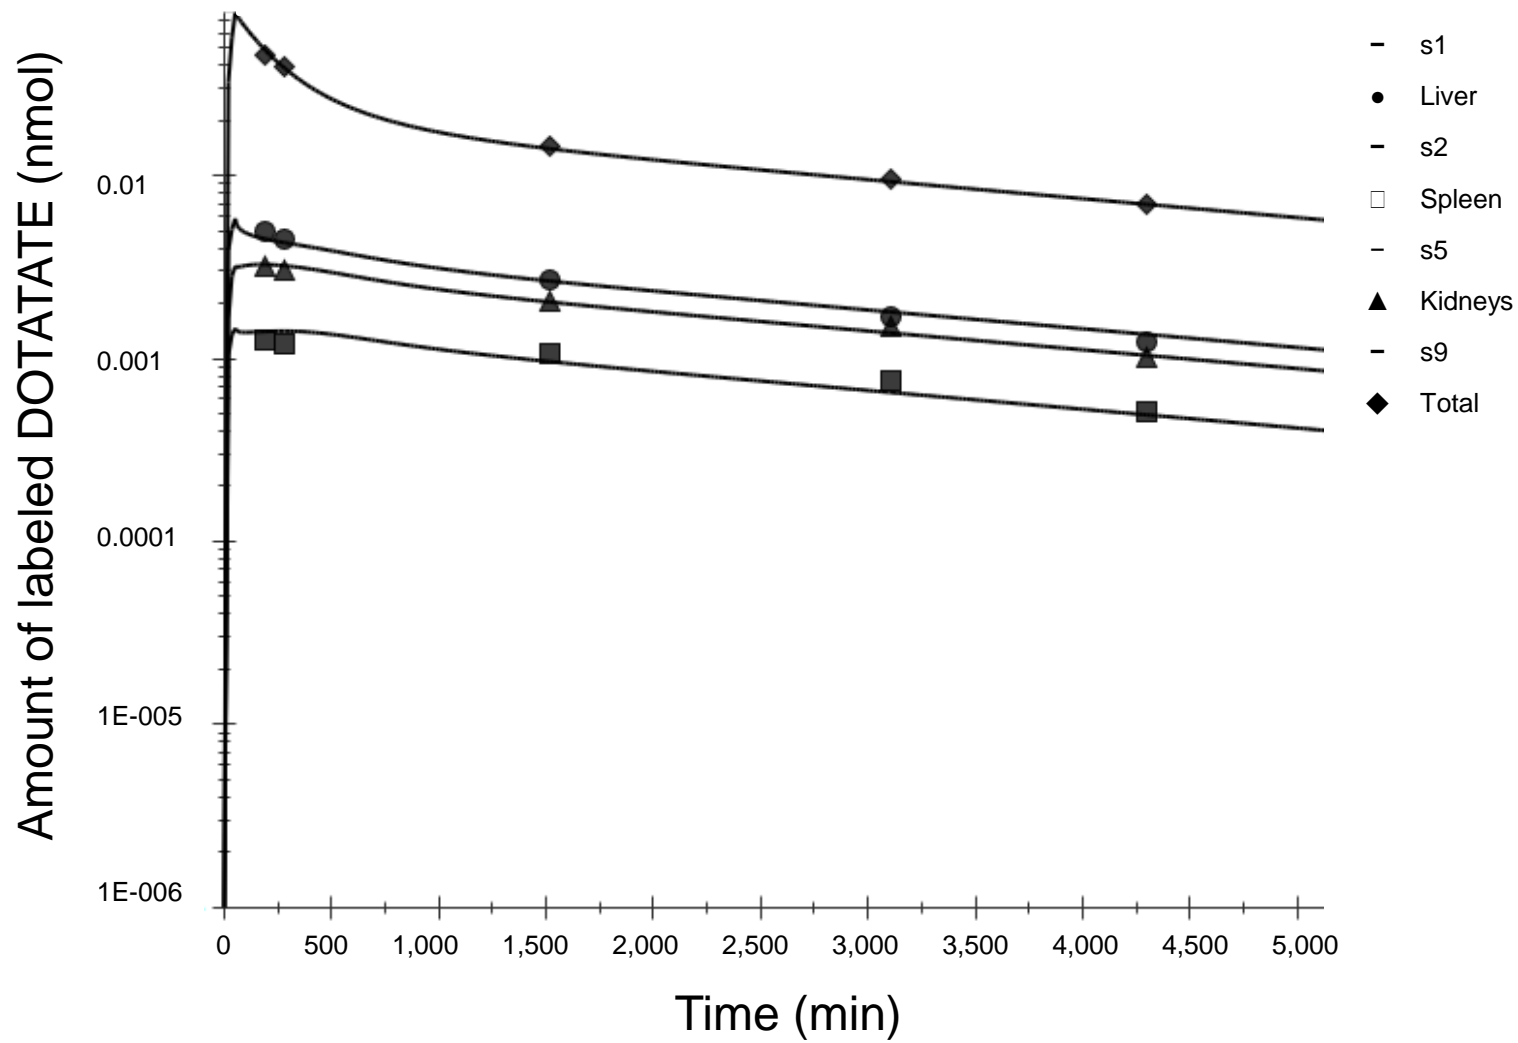

3B

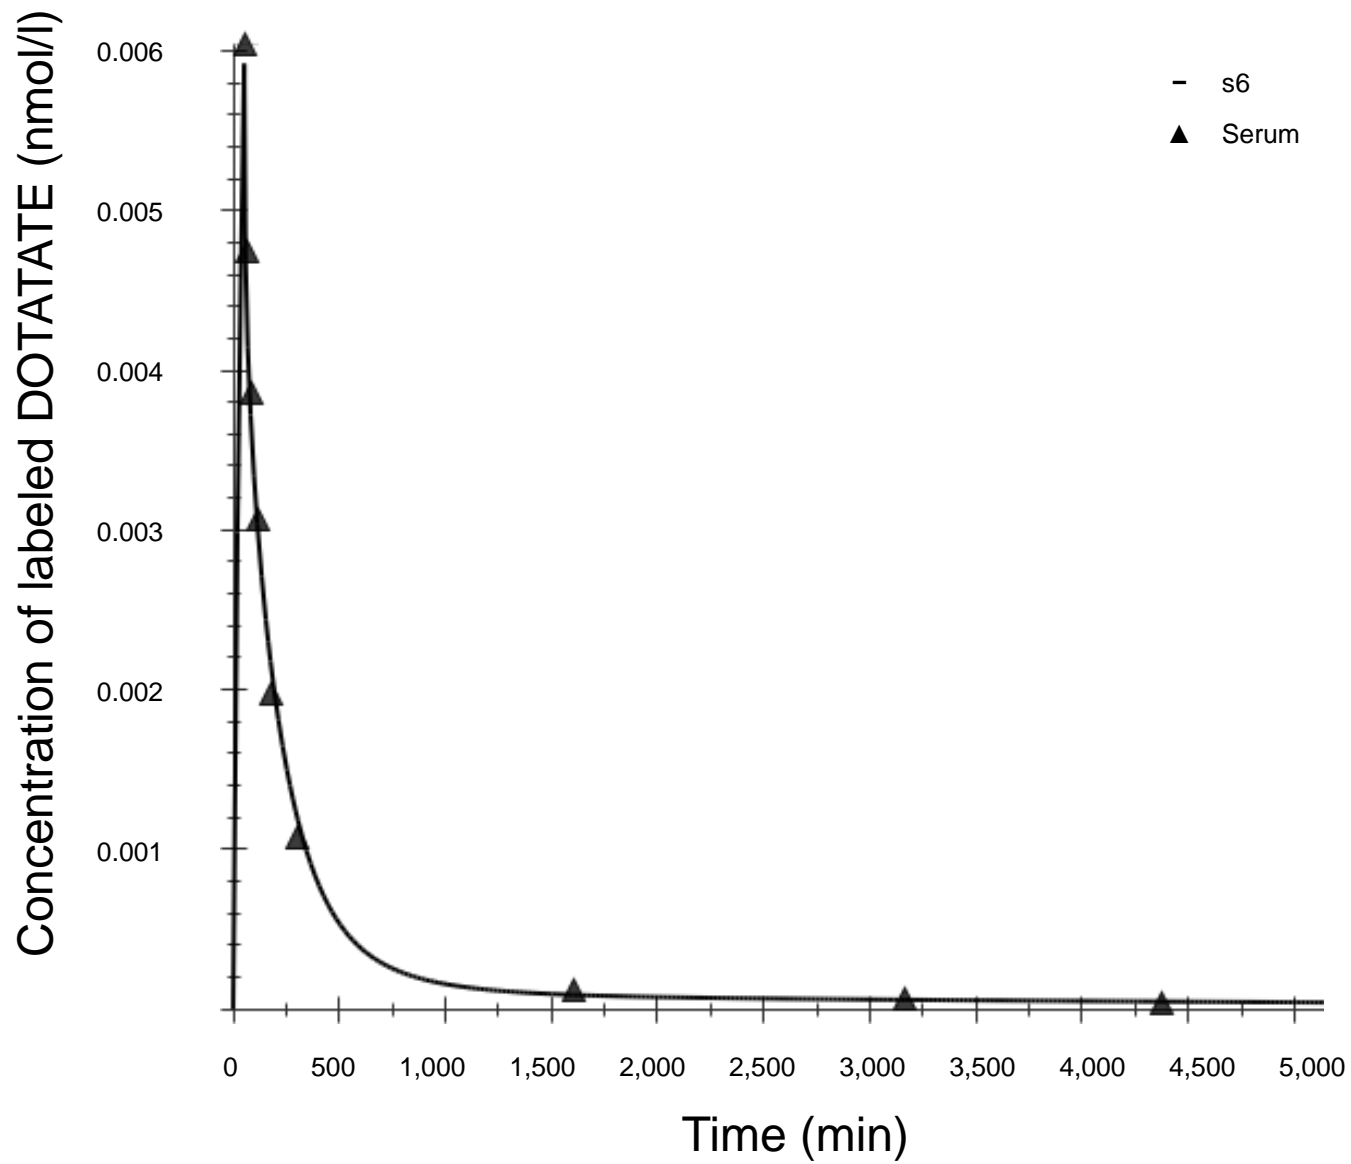

3C

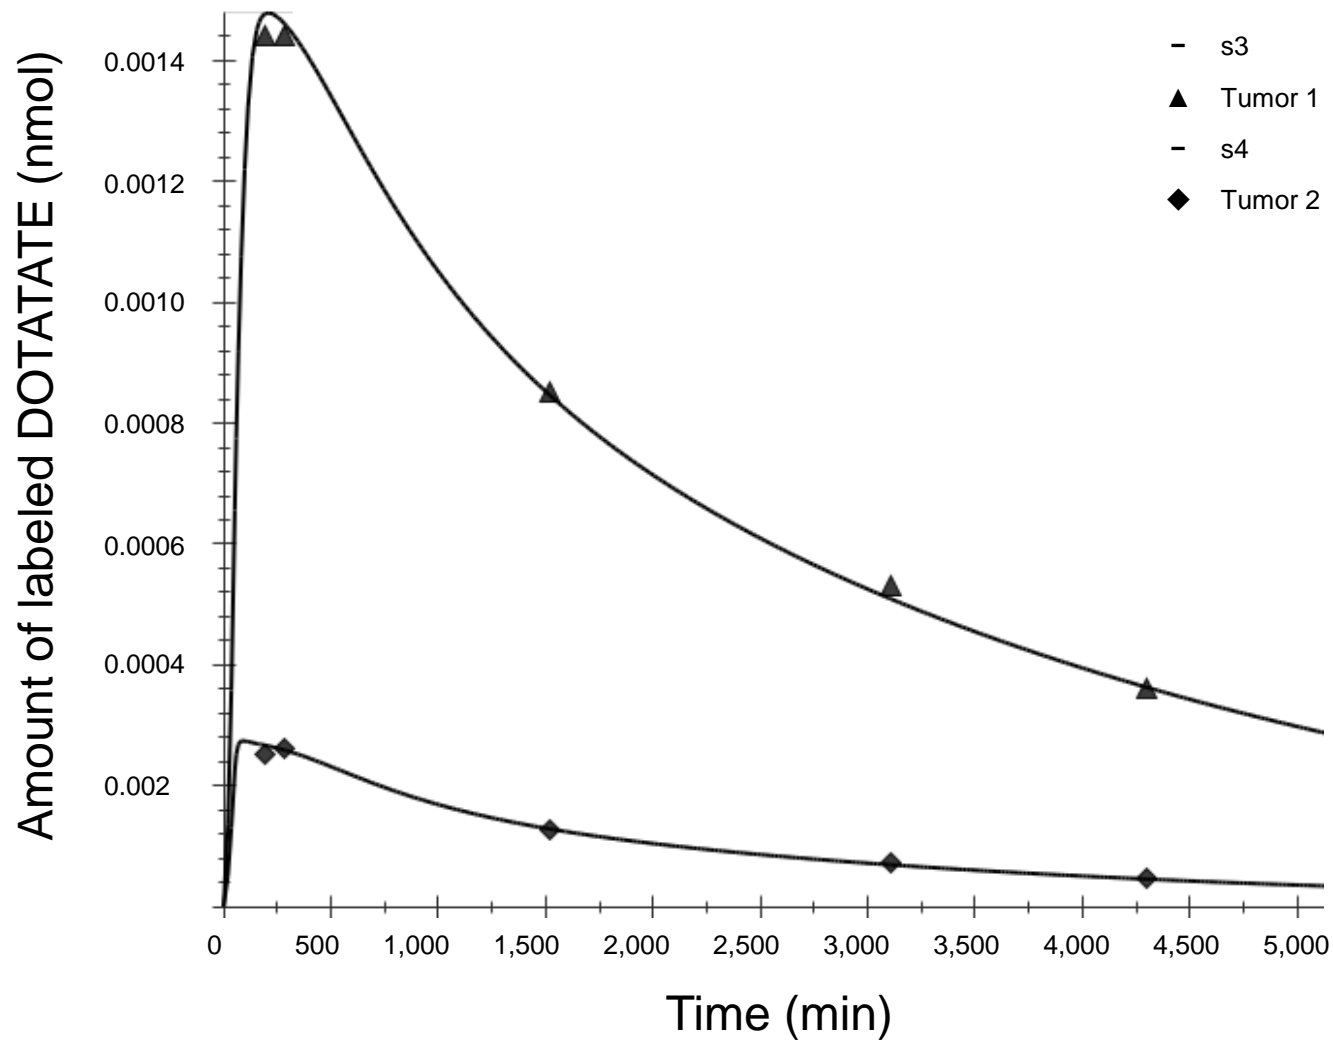

4A

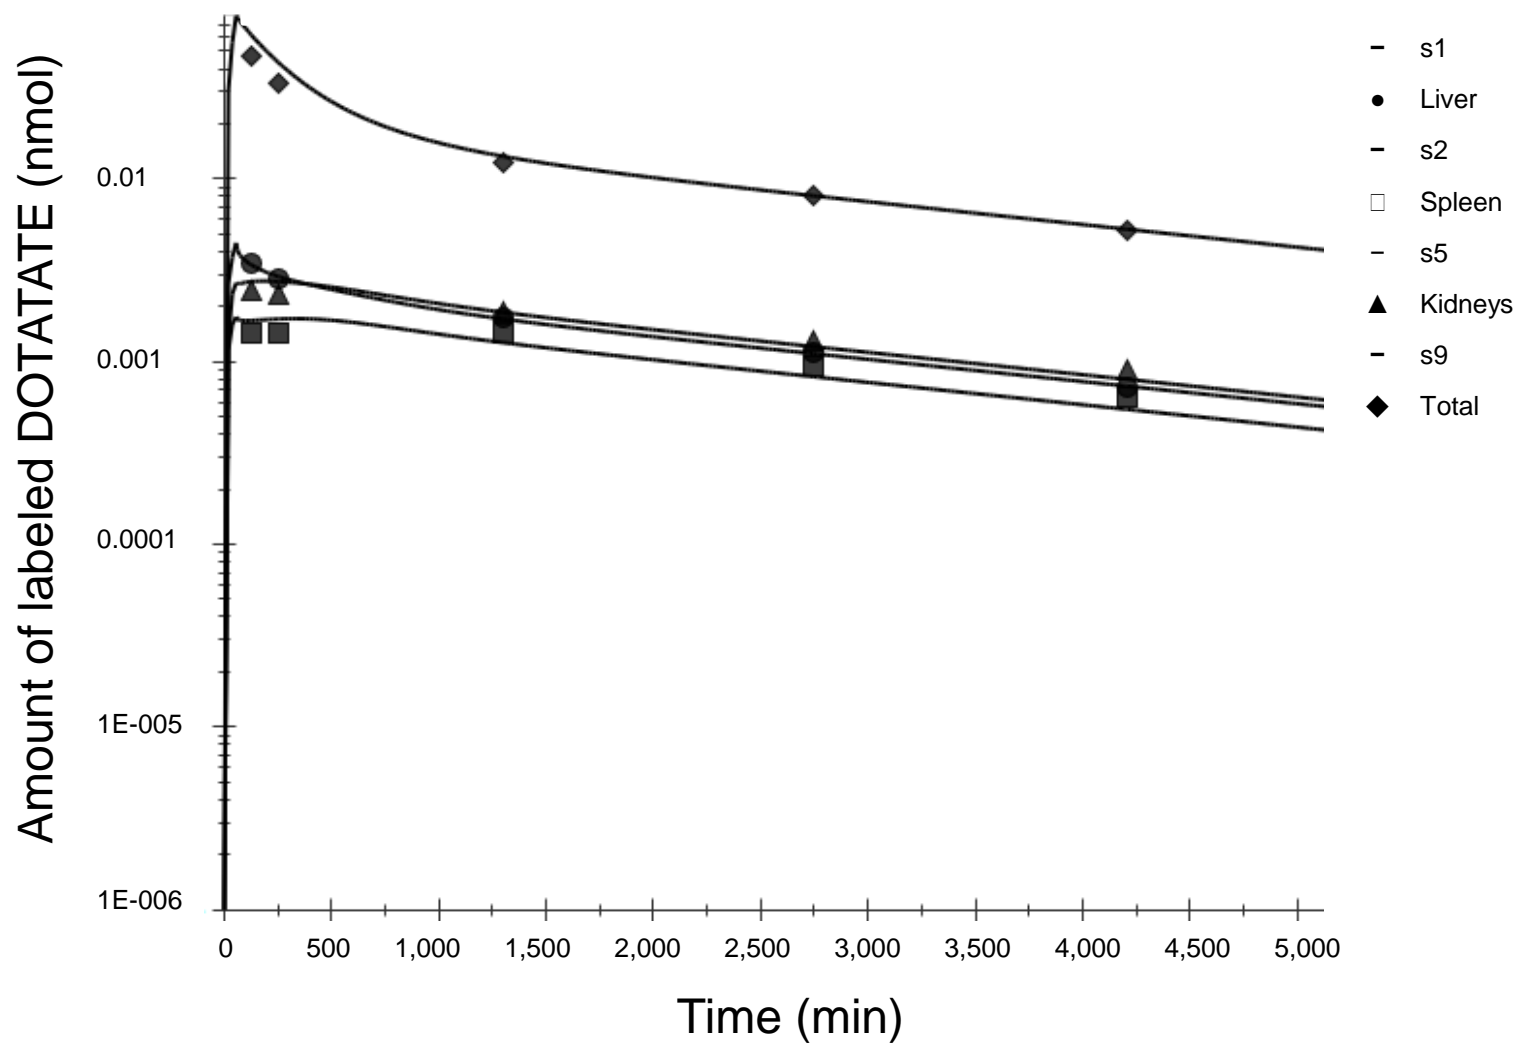

4B

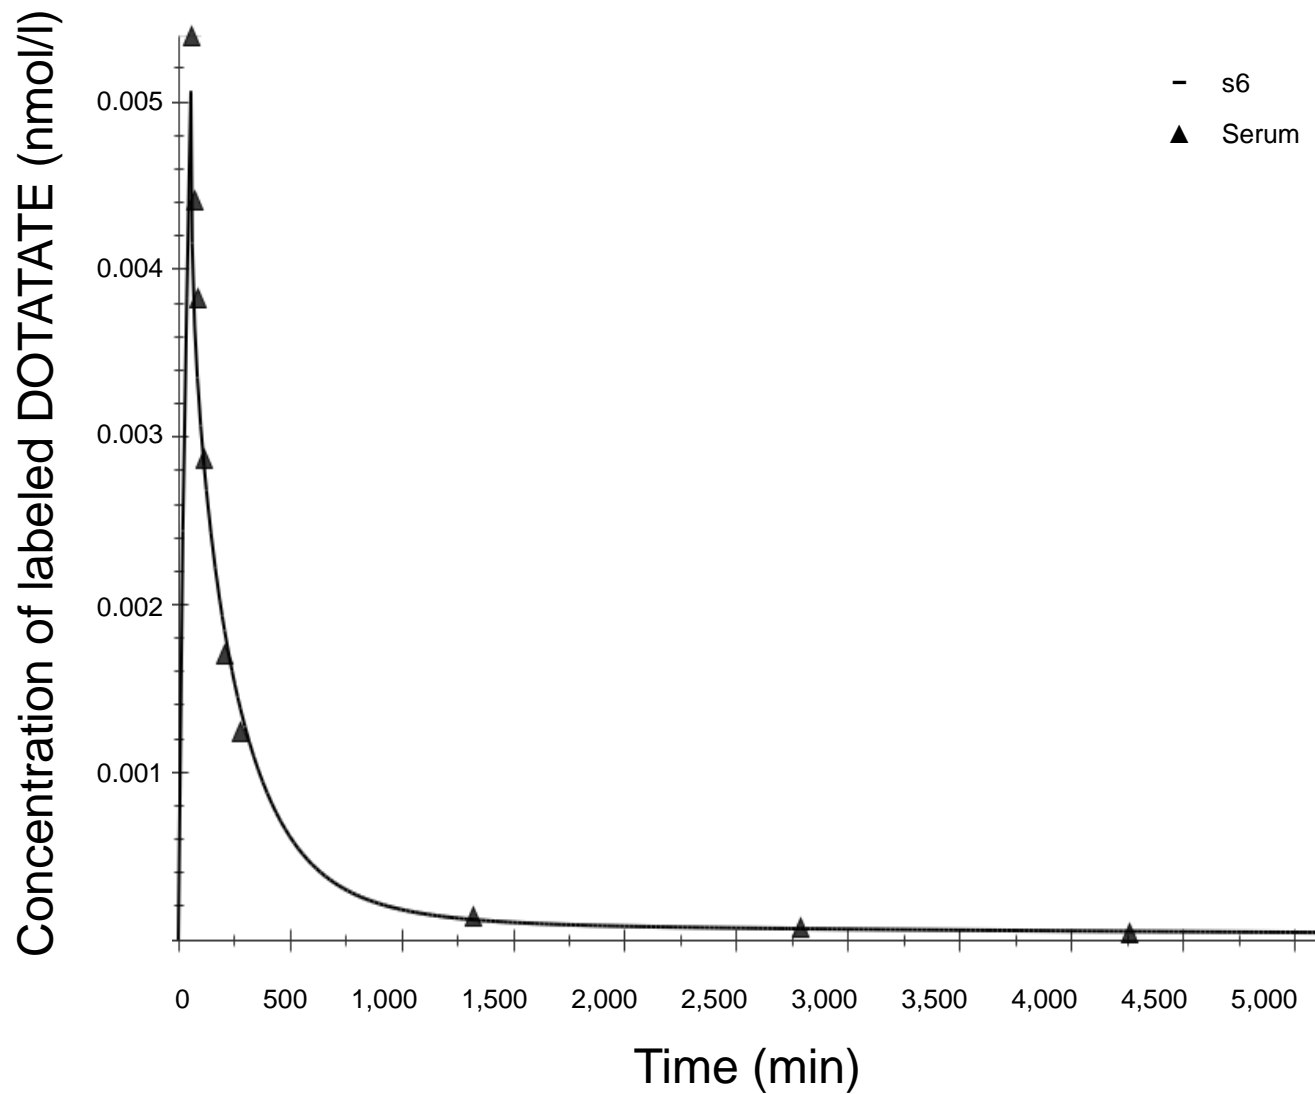

4C

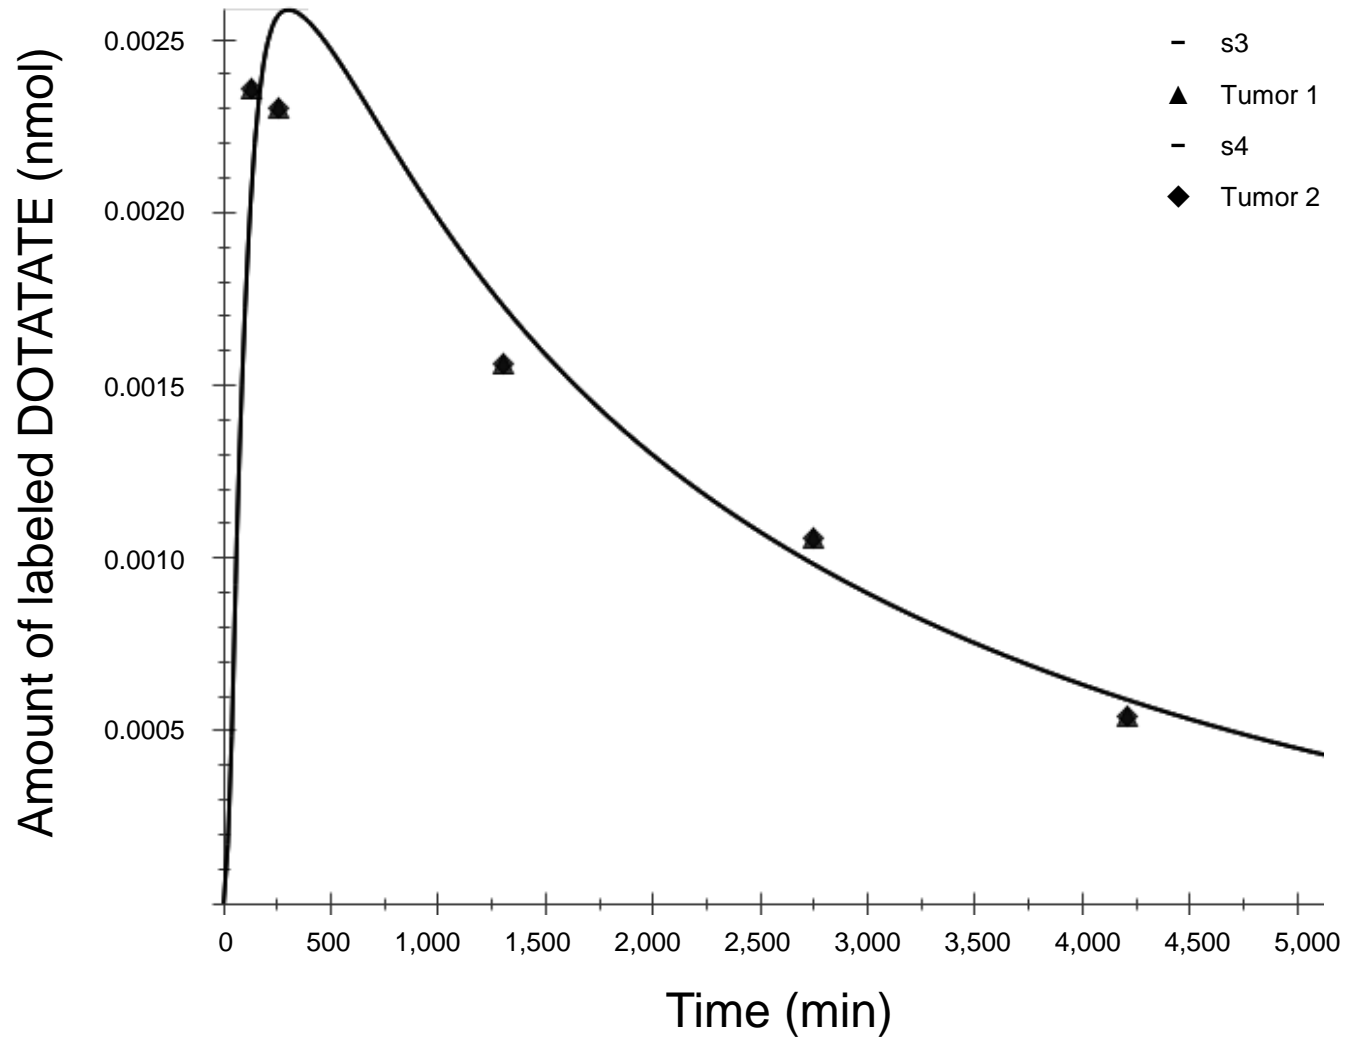



5A

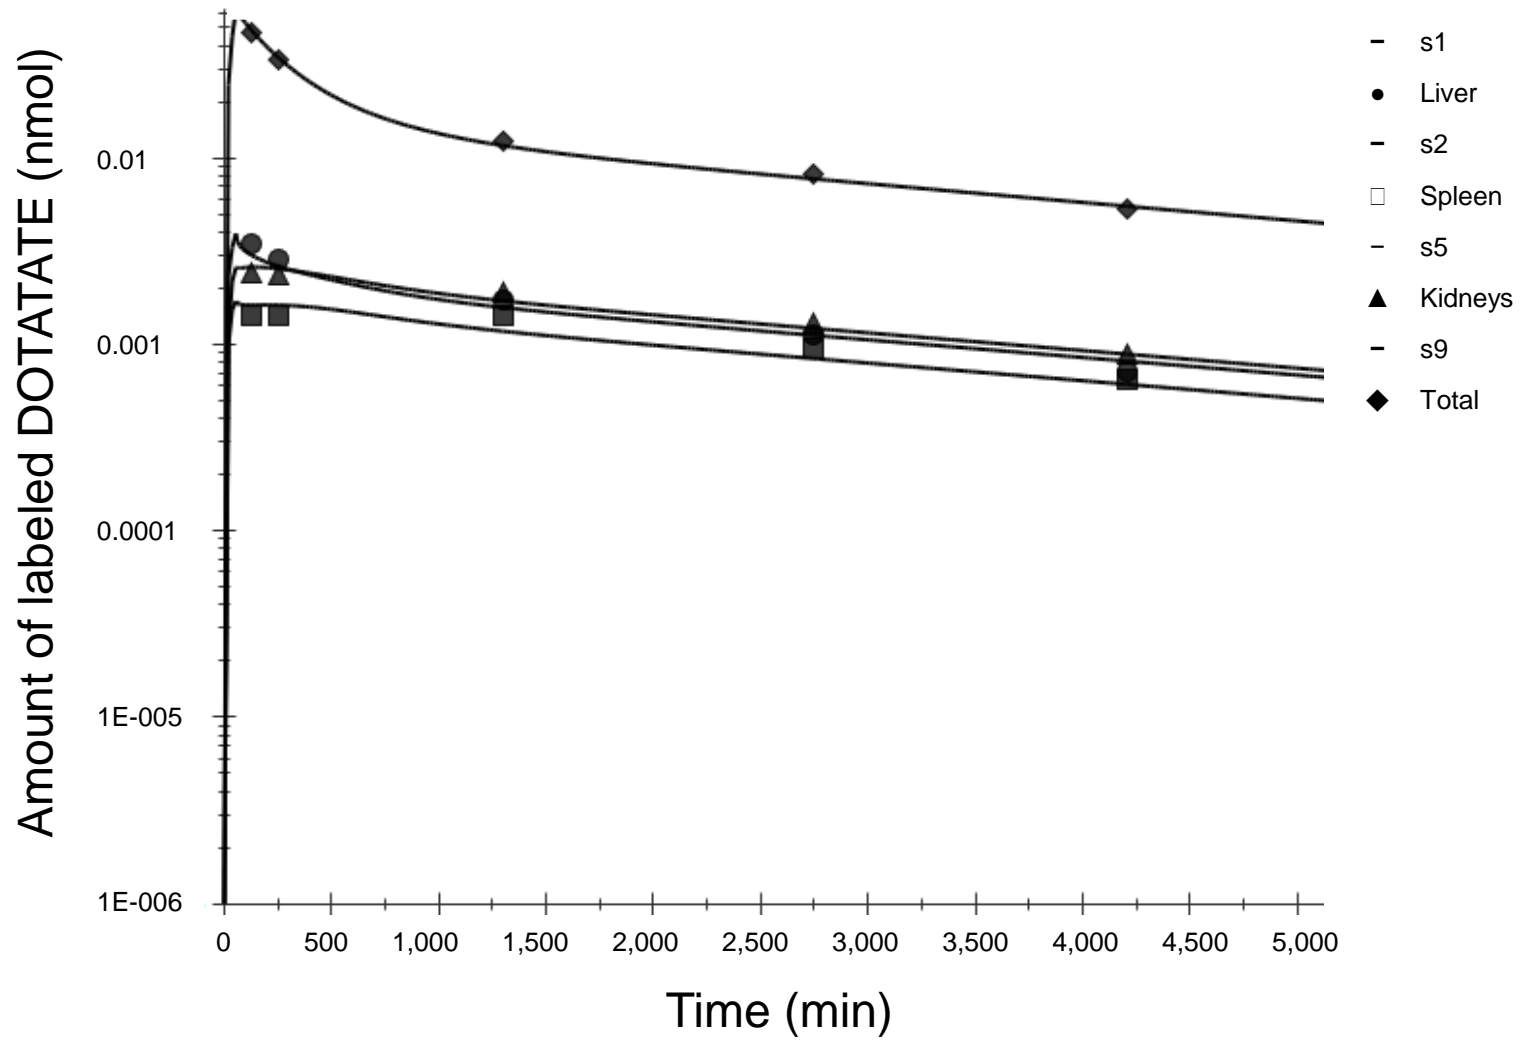

5B

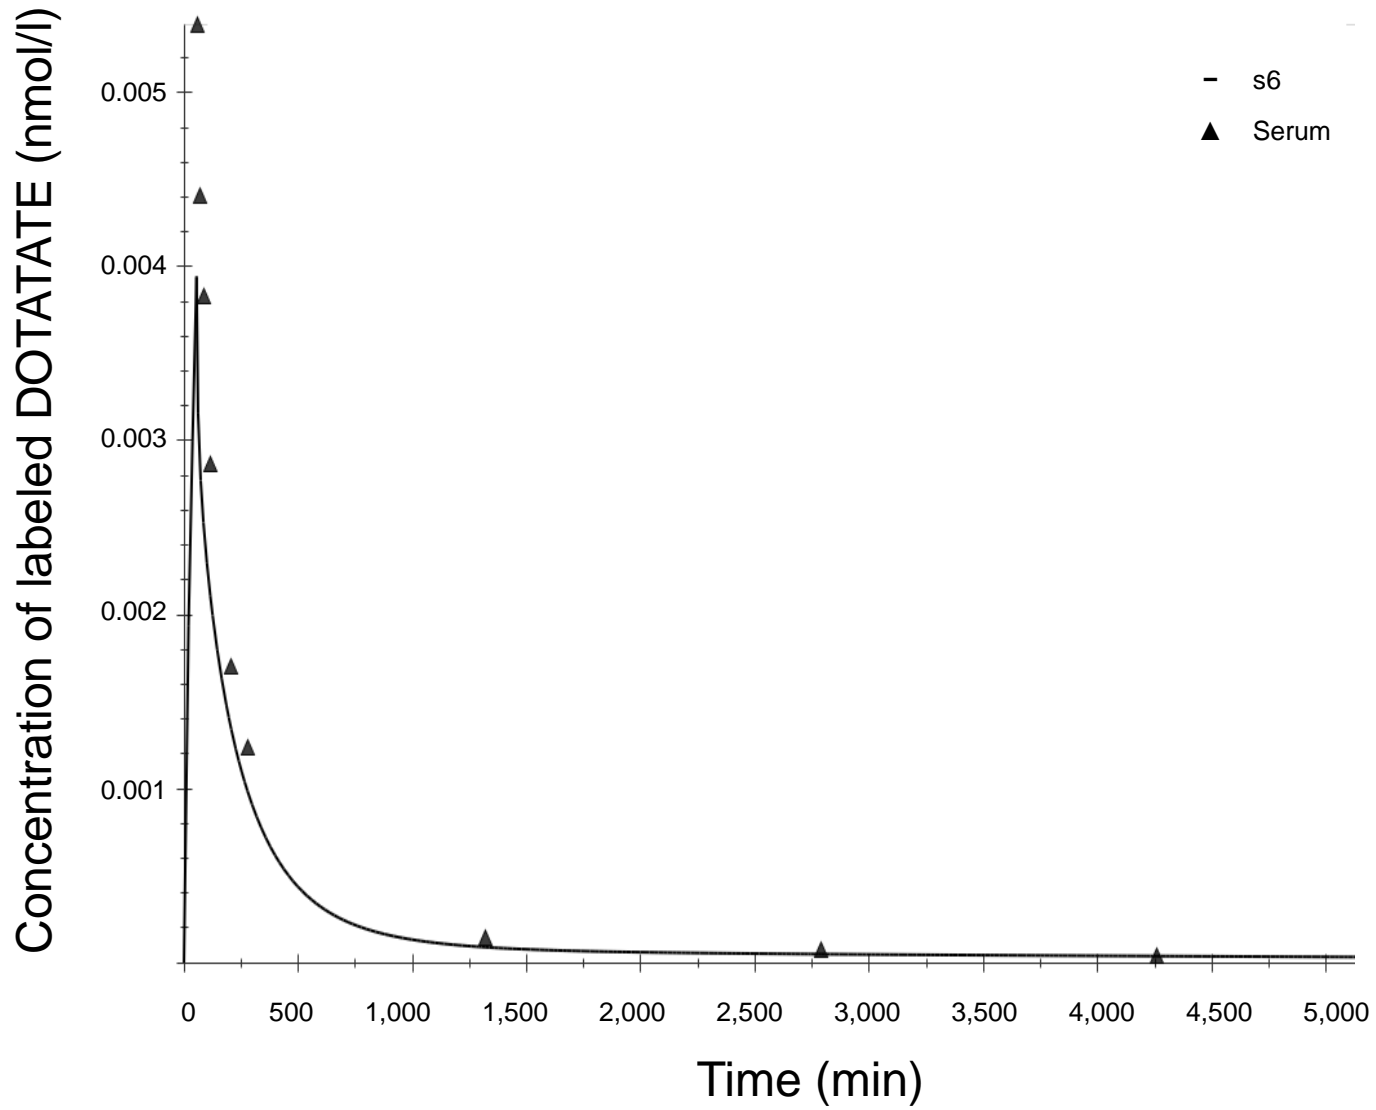

5C

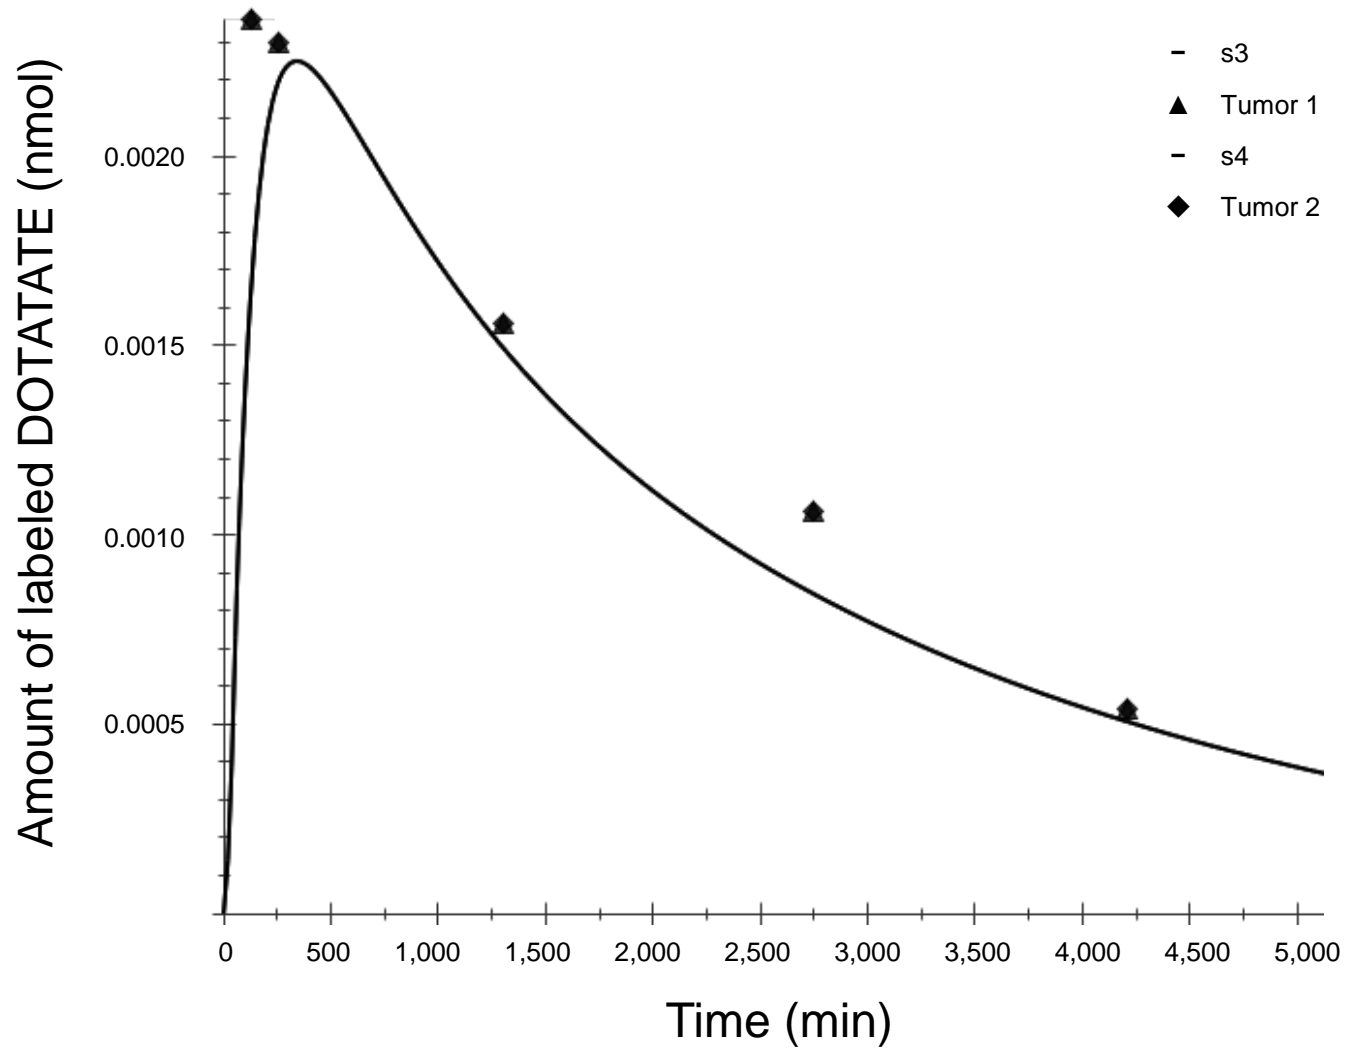

6A

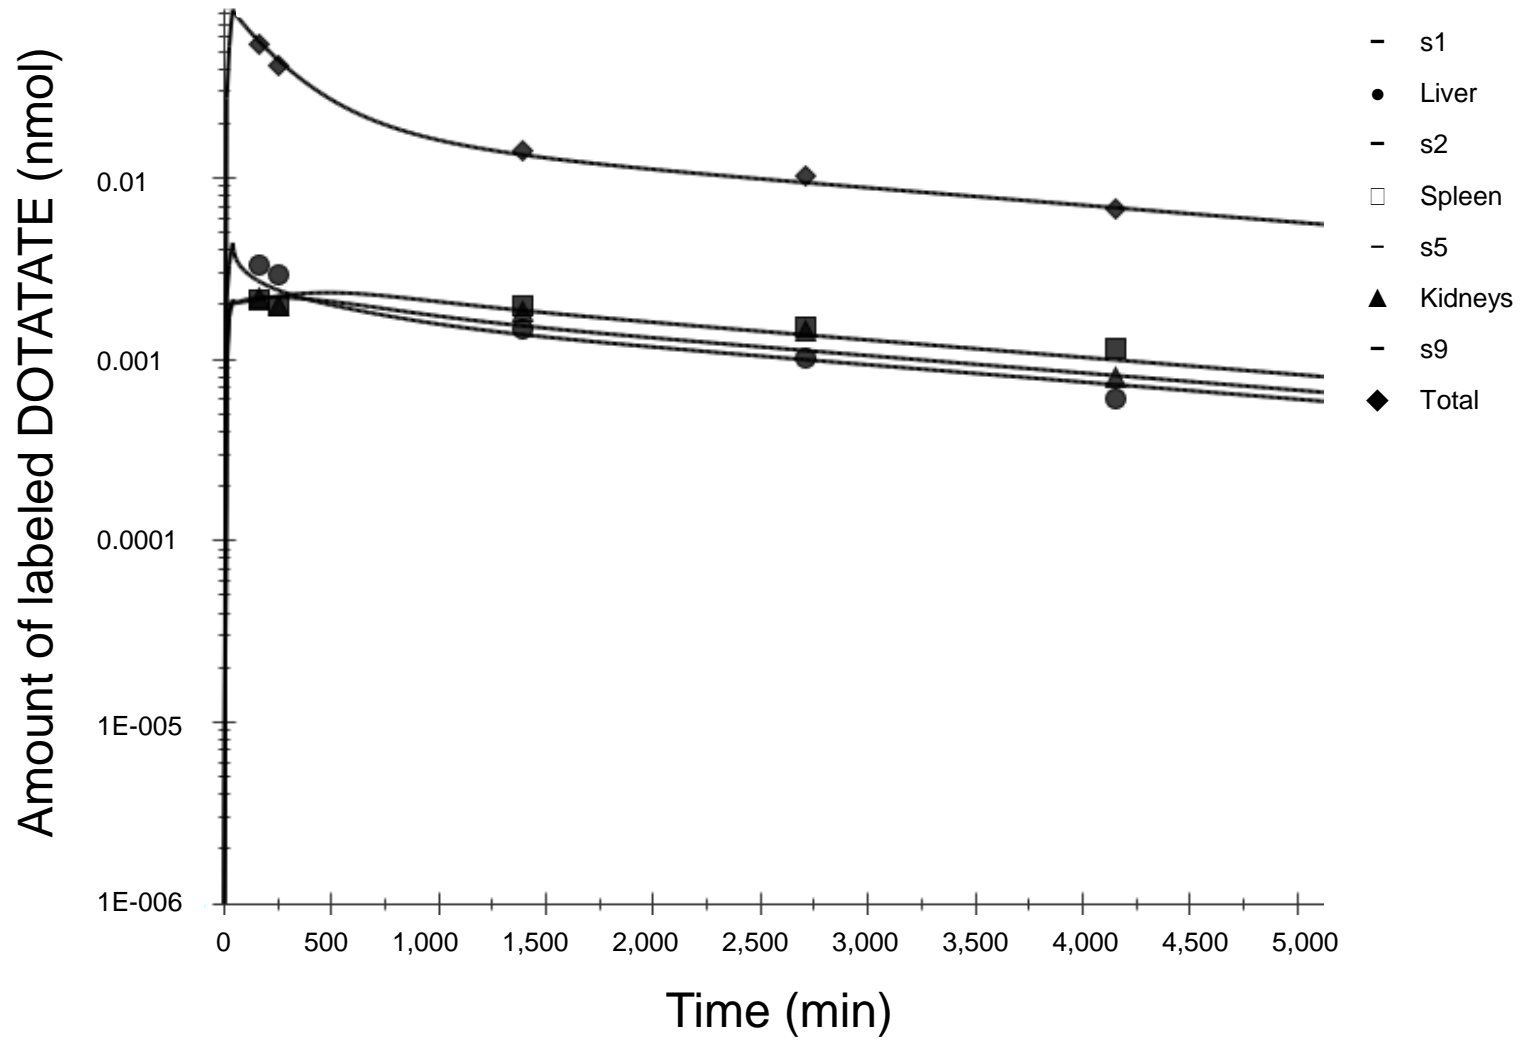

6B

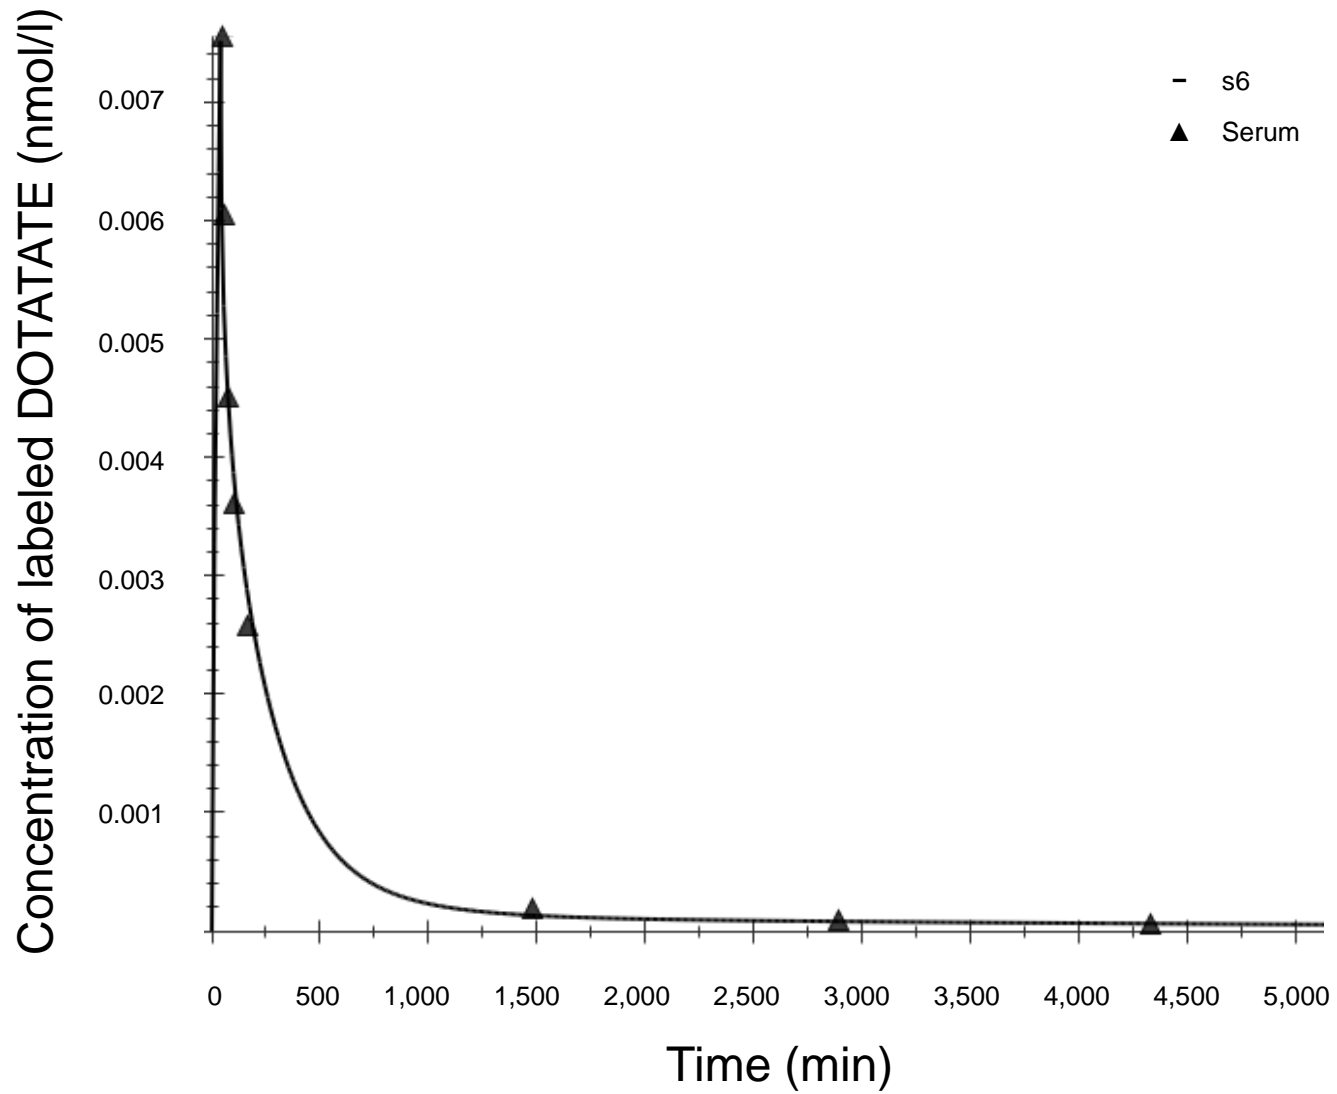

6C

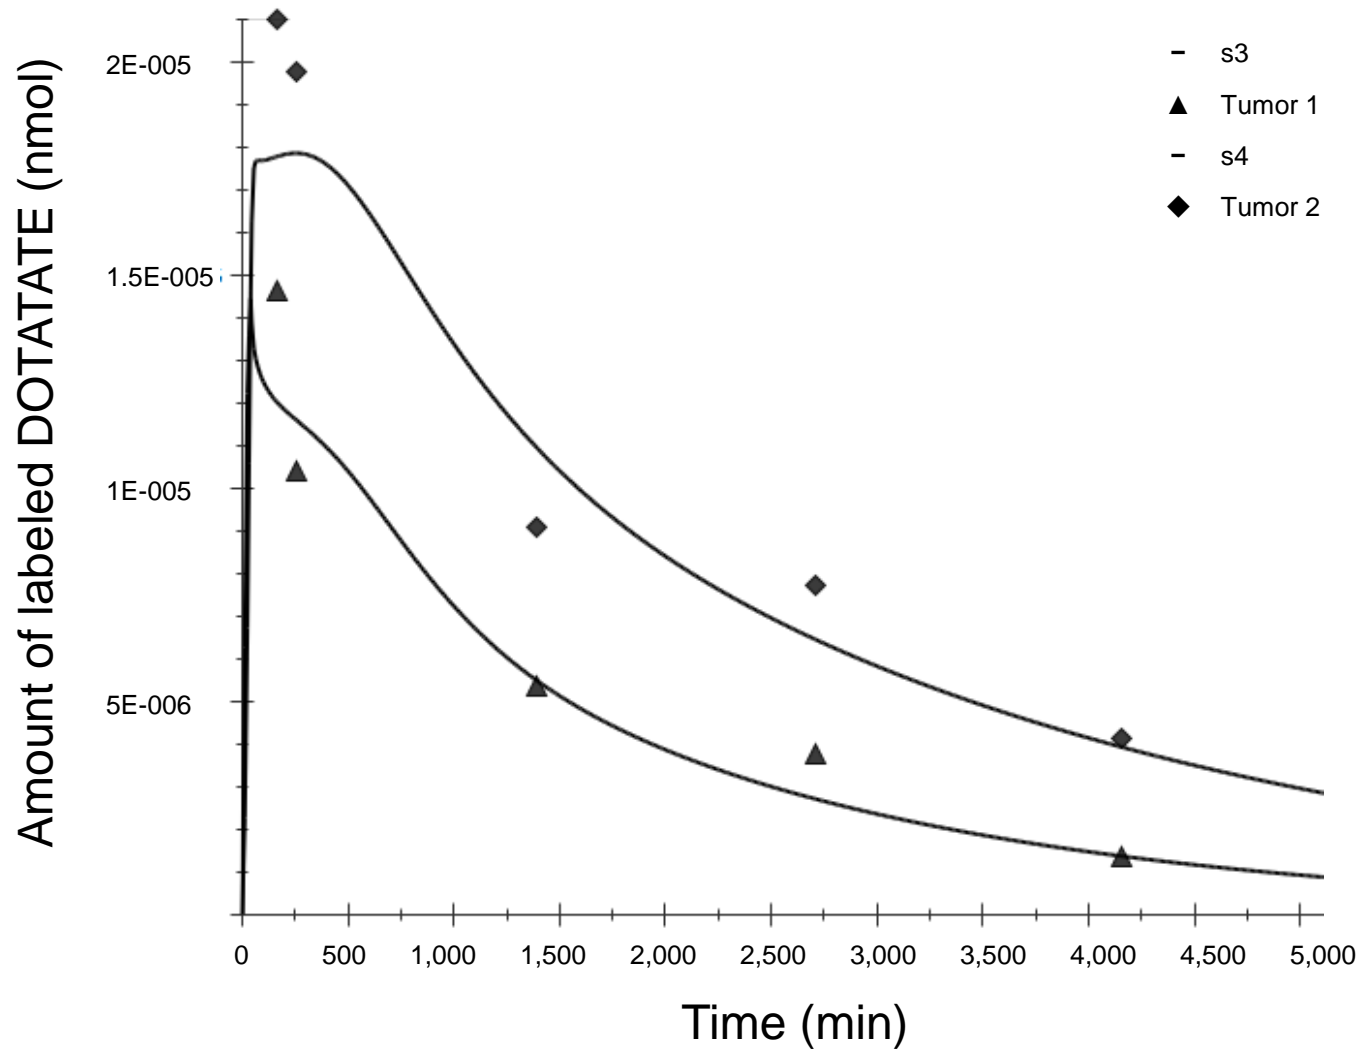

7A

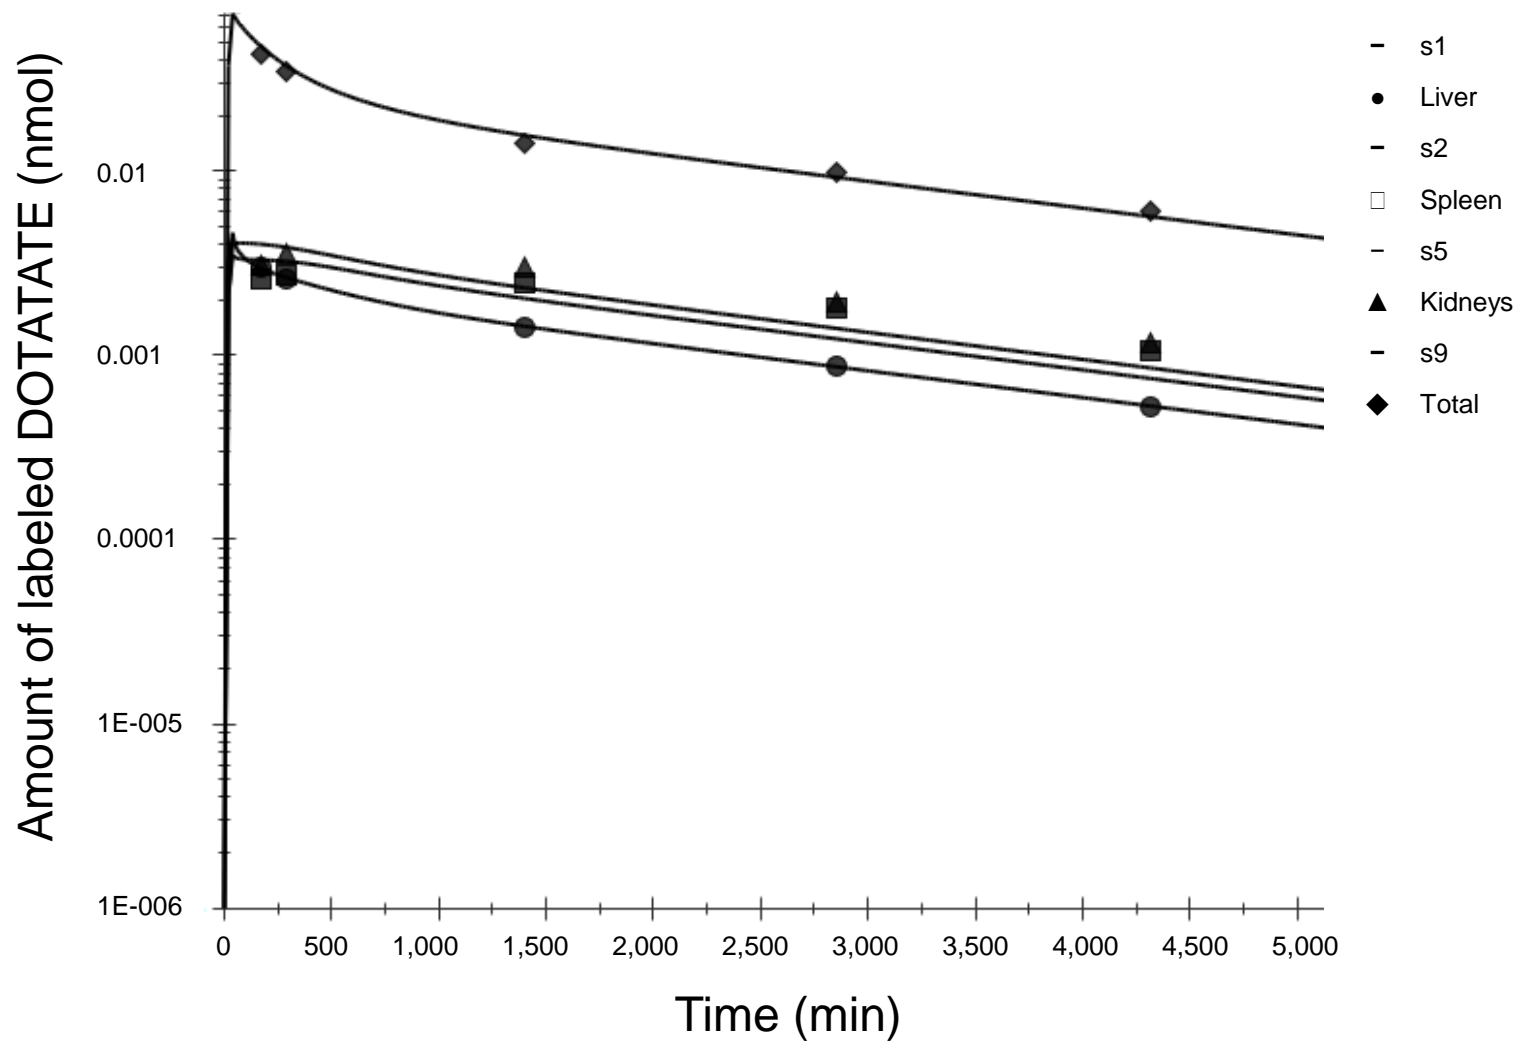

7B

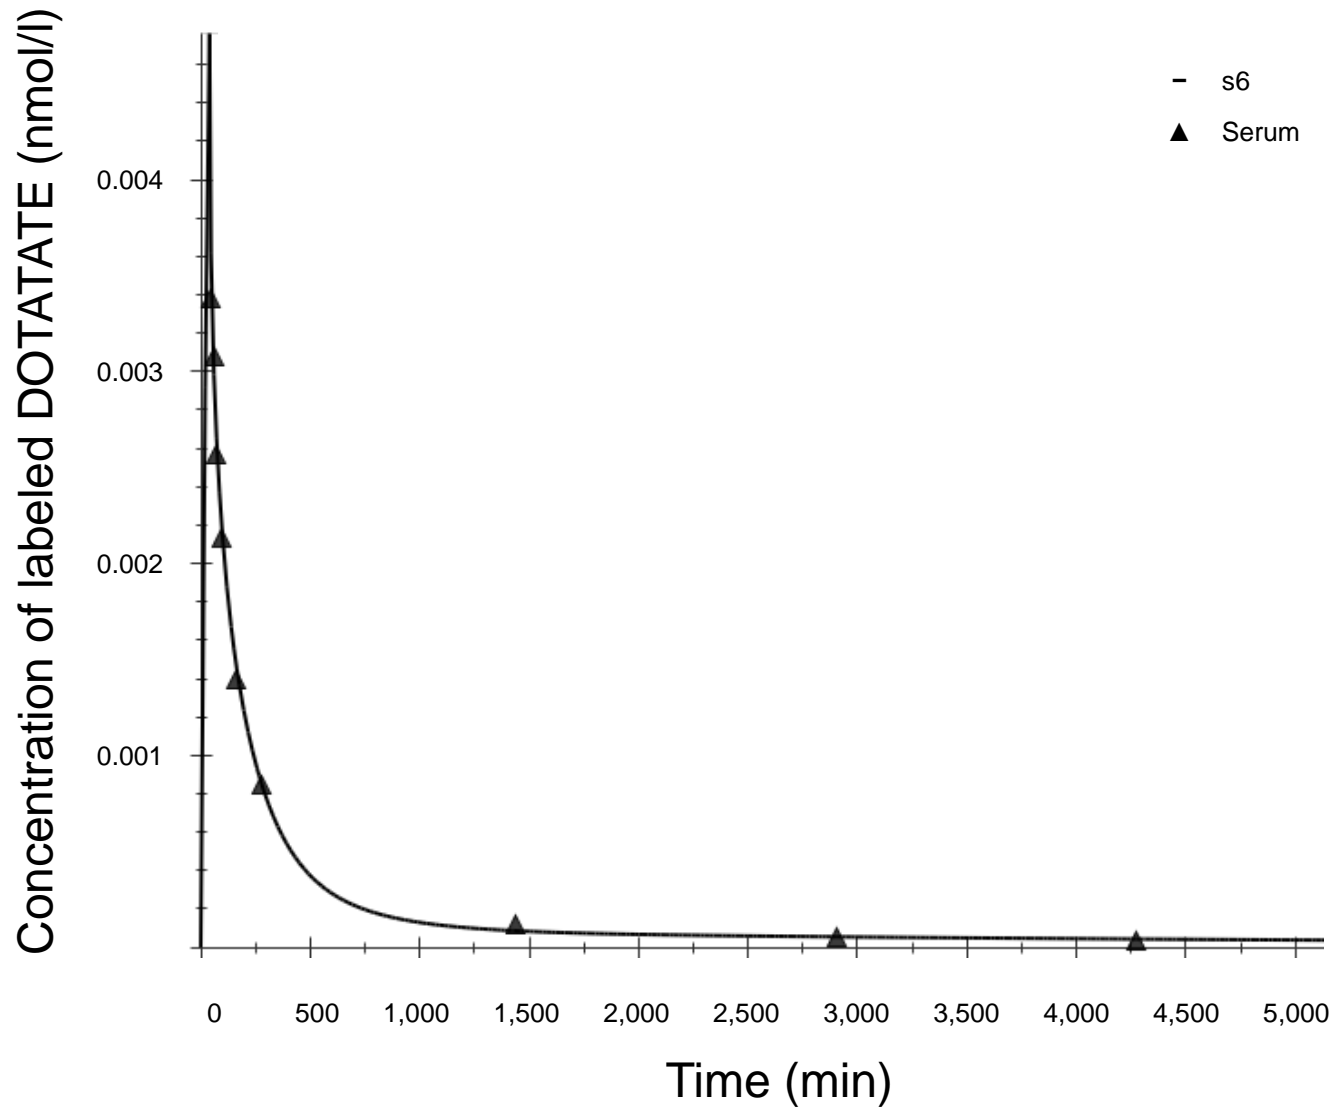



7C

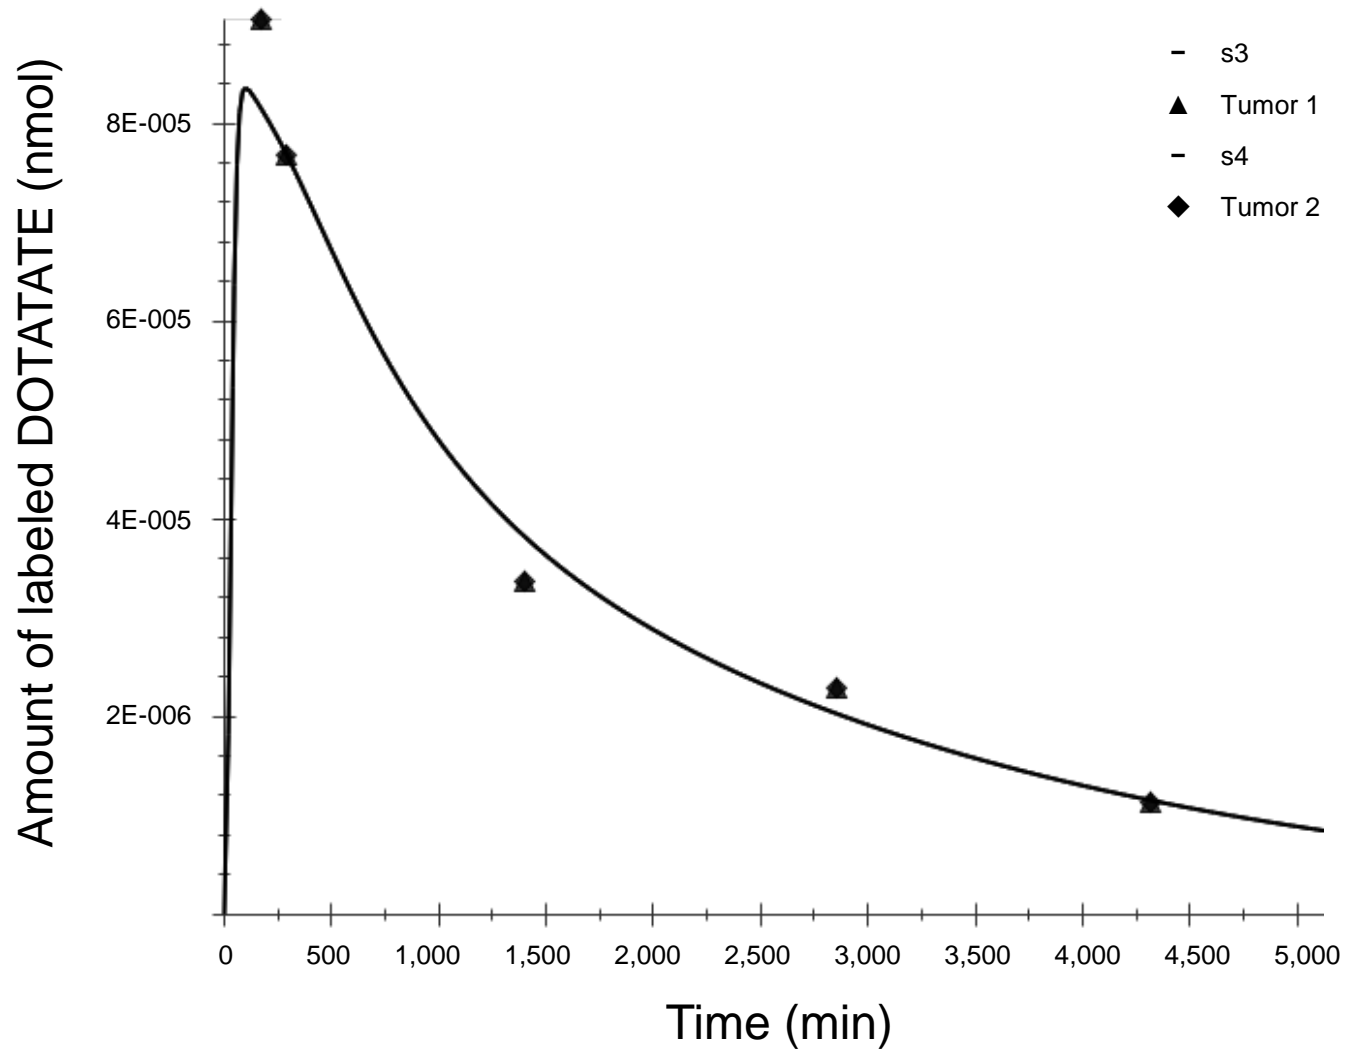



8B

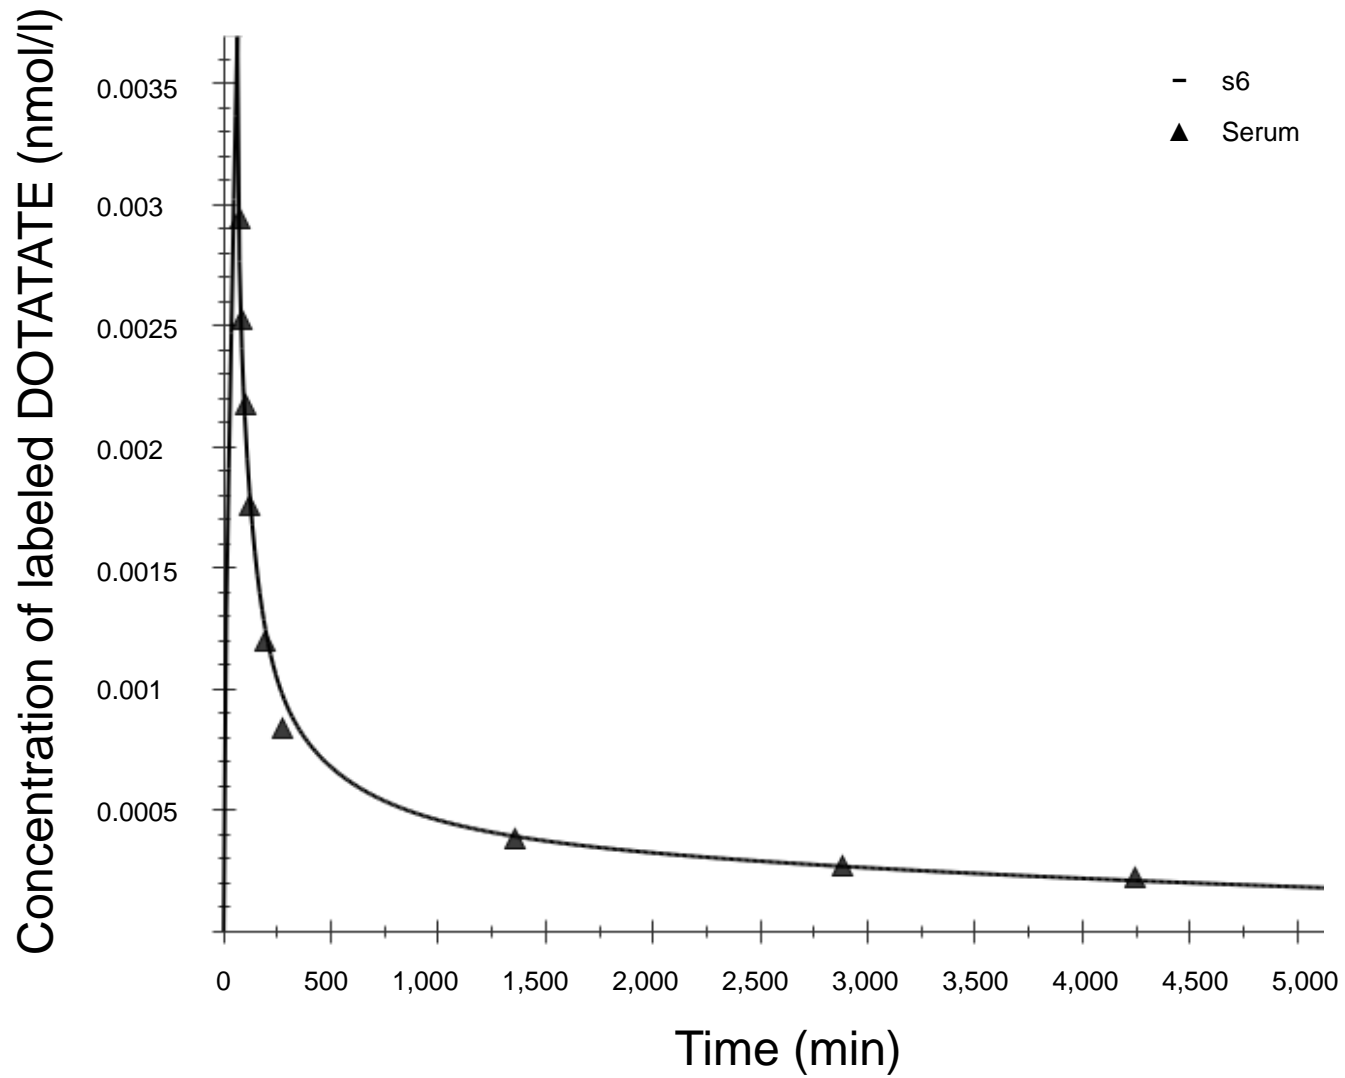

8C

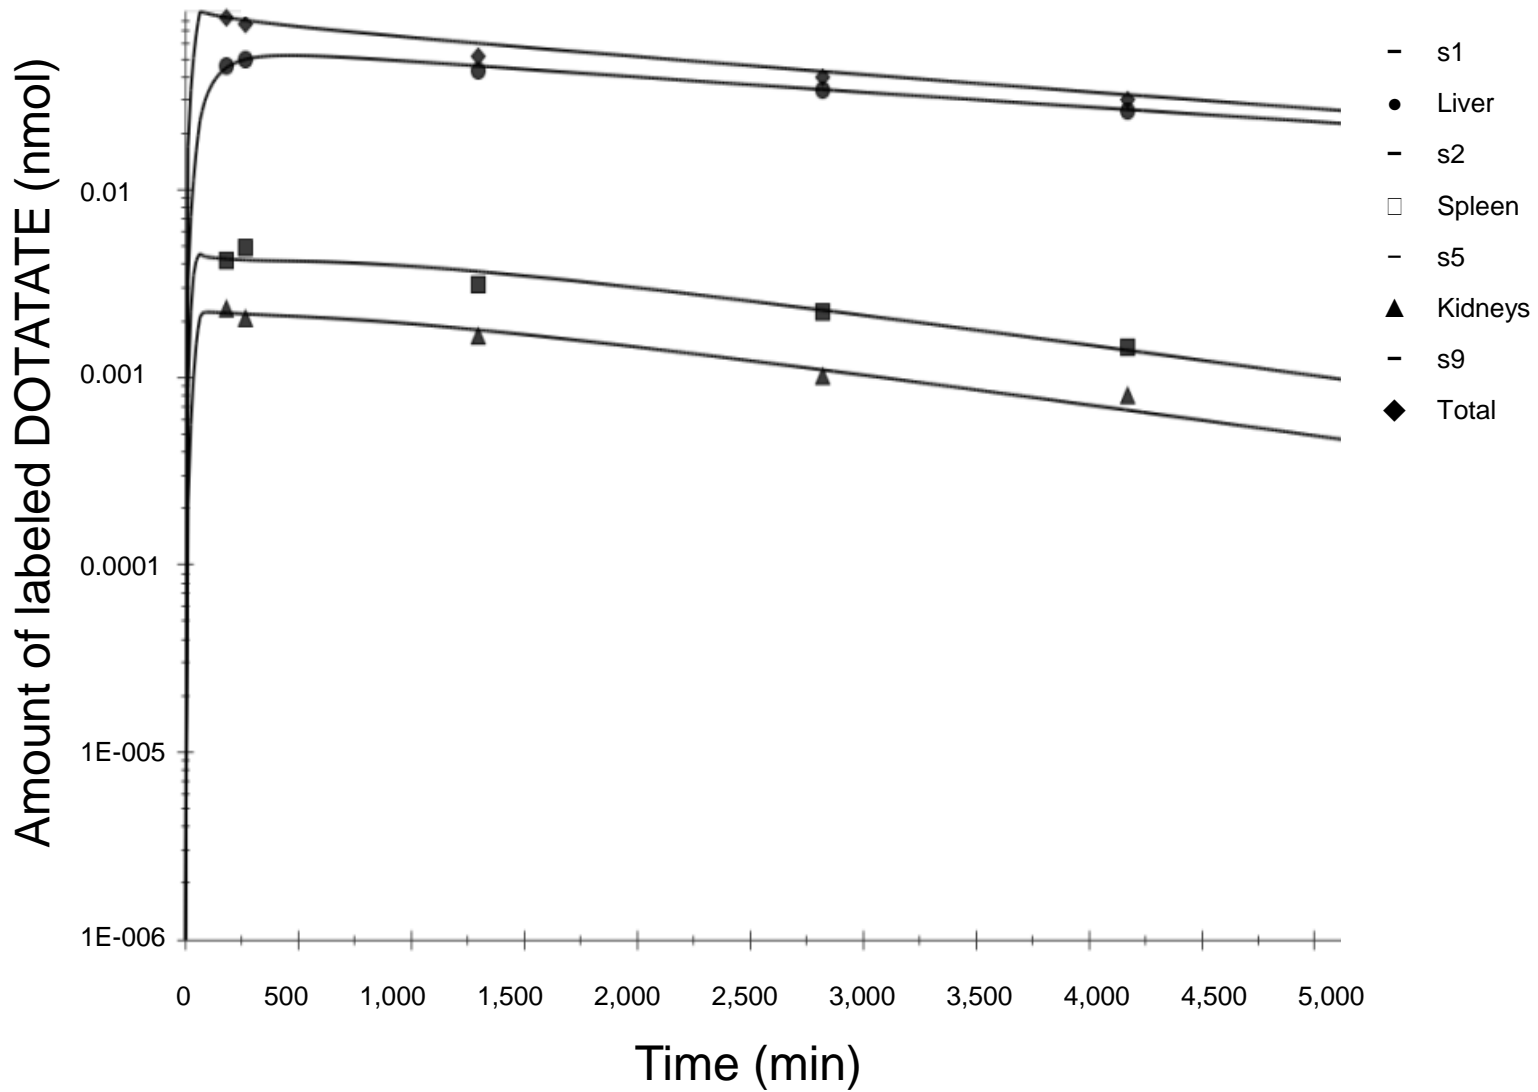

88 D

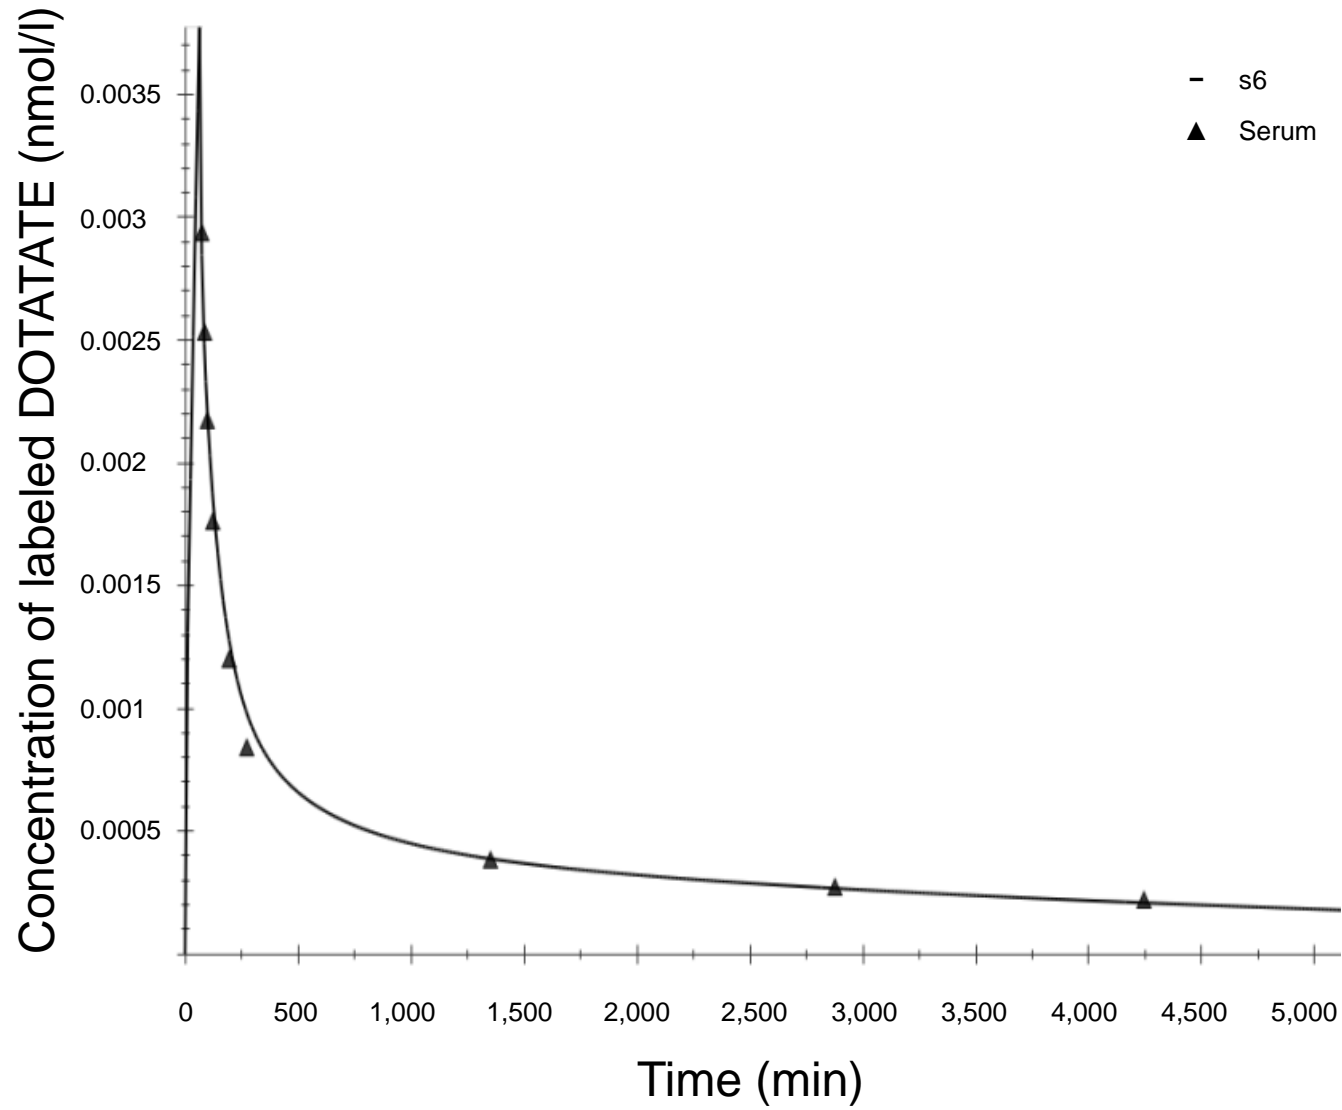

9A

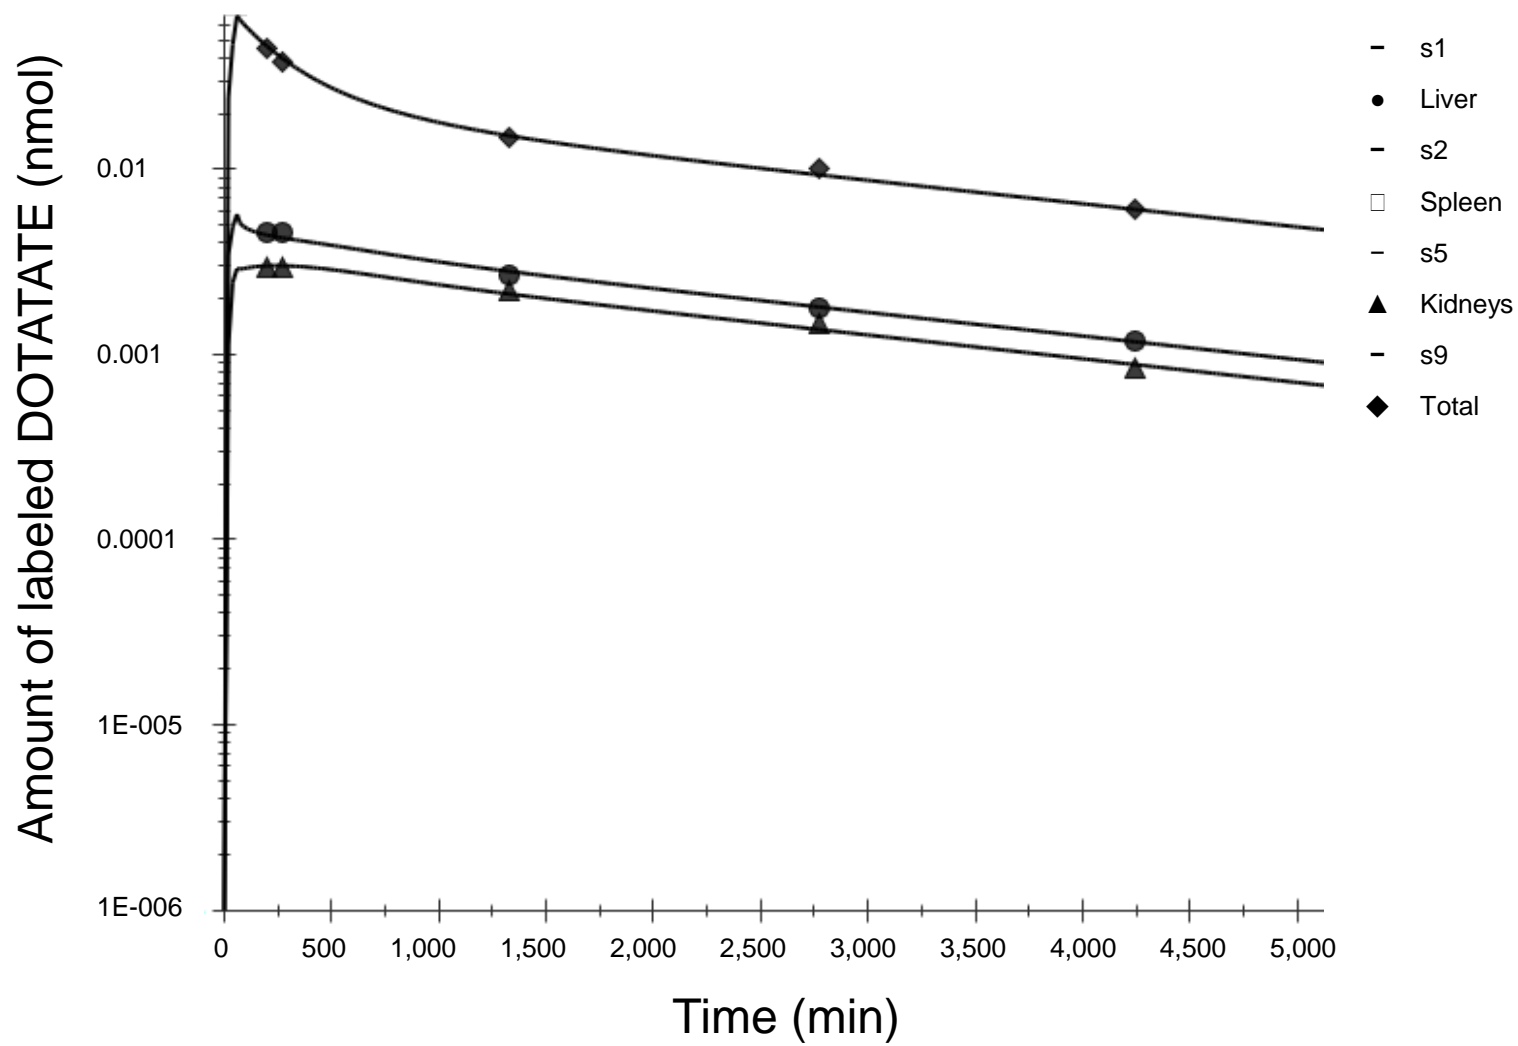

9B

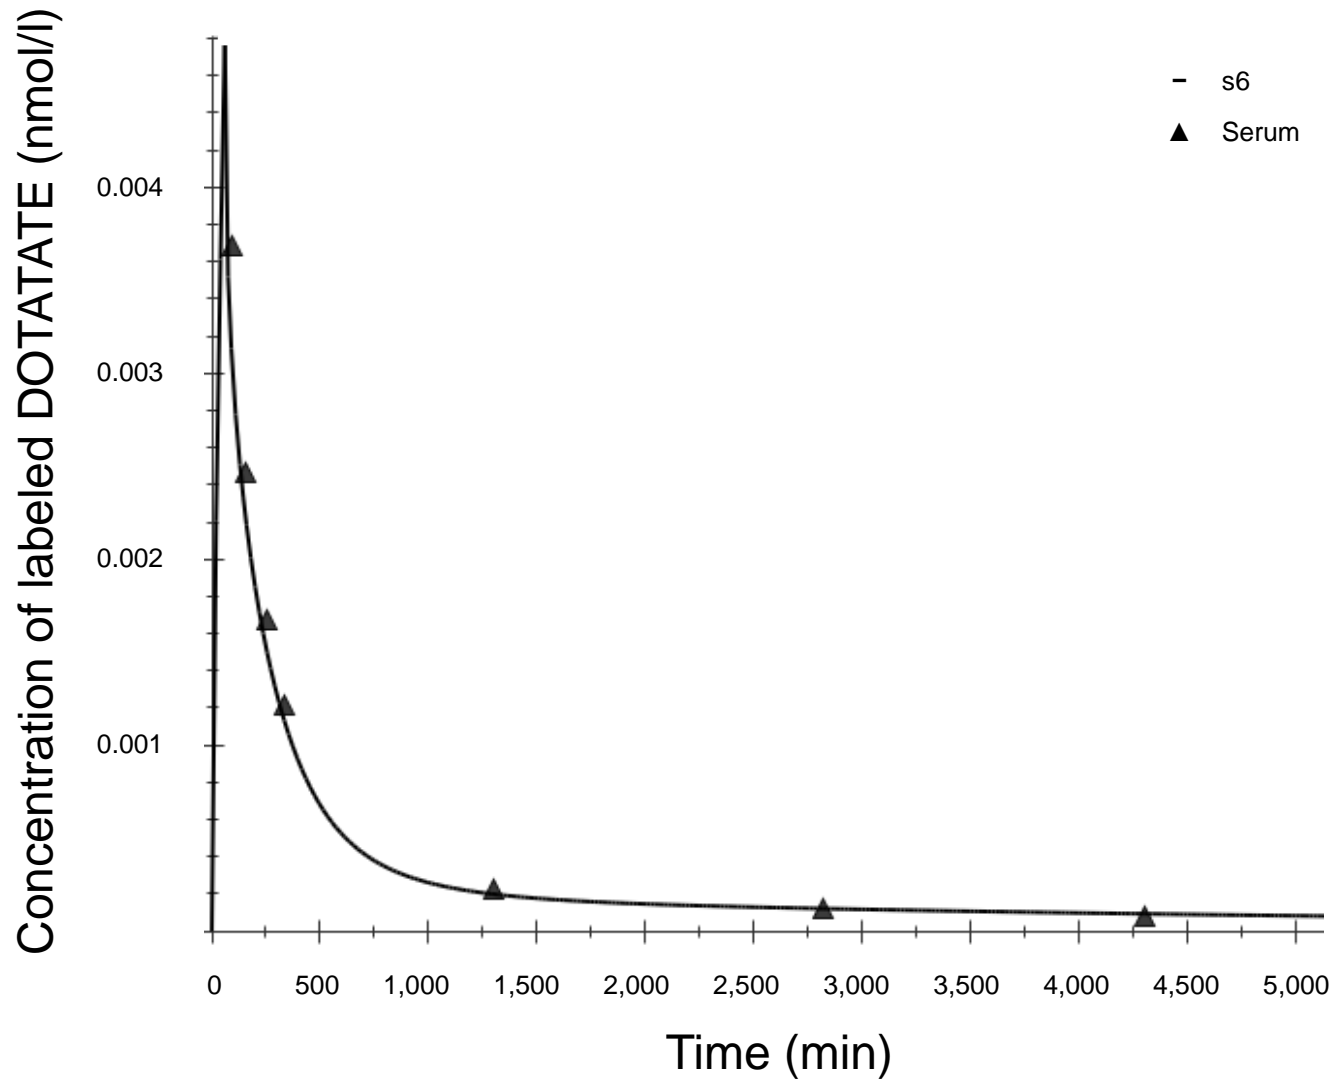

90

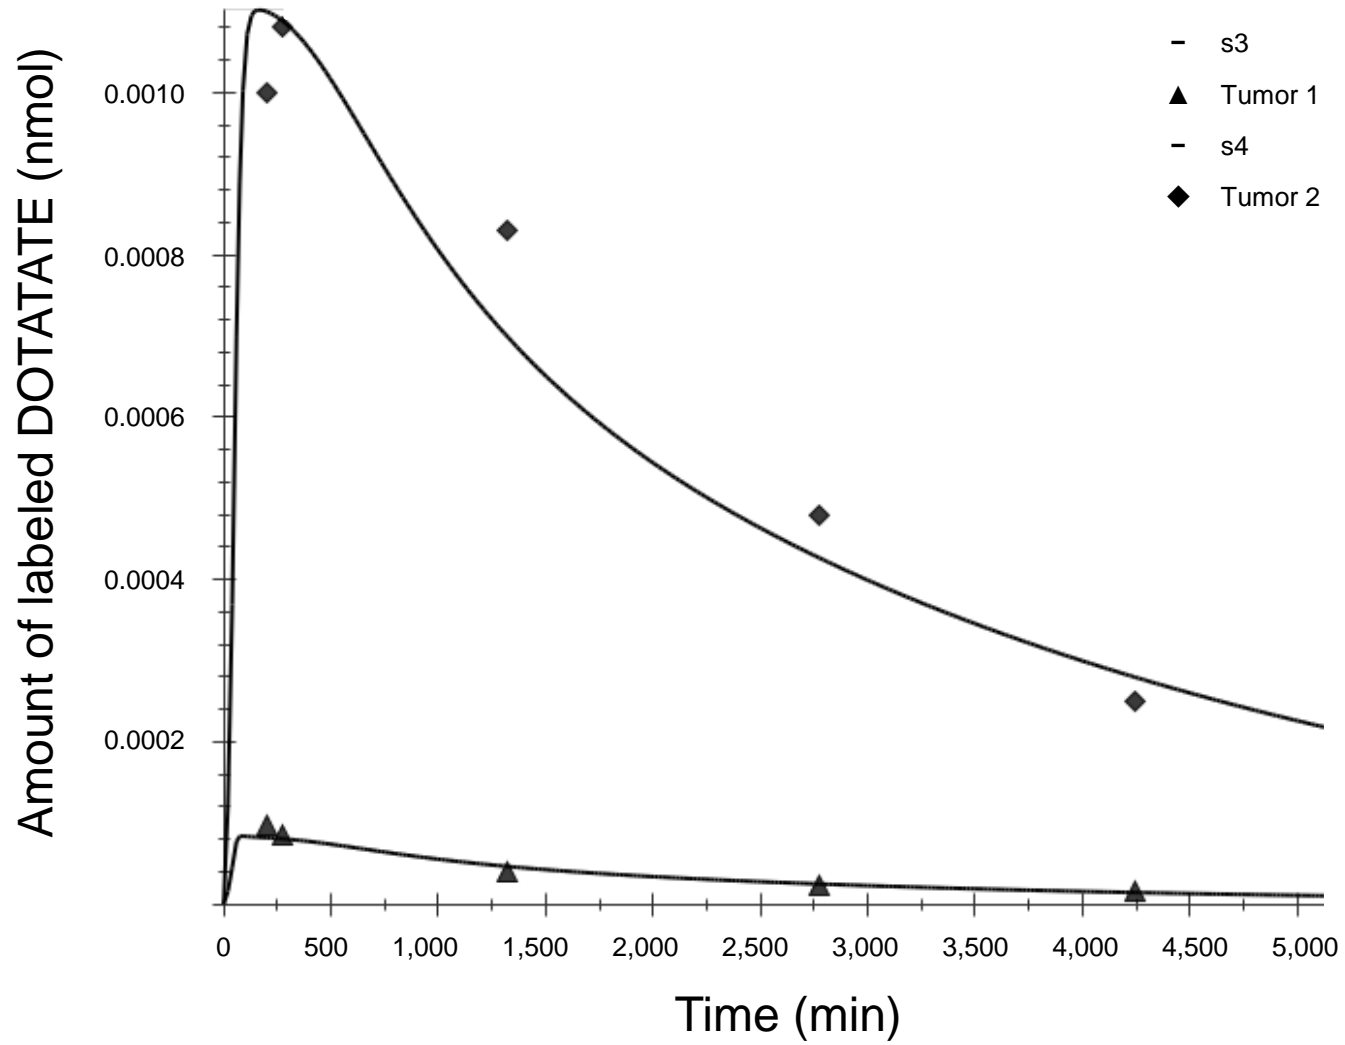





9E

Concentration of labeled DOTATATE (nmol/l)

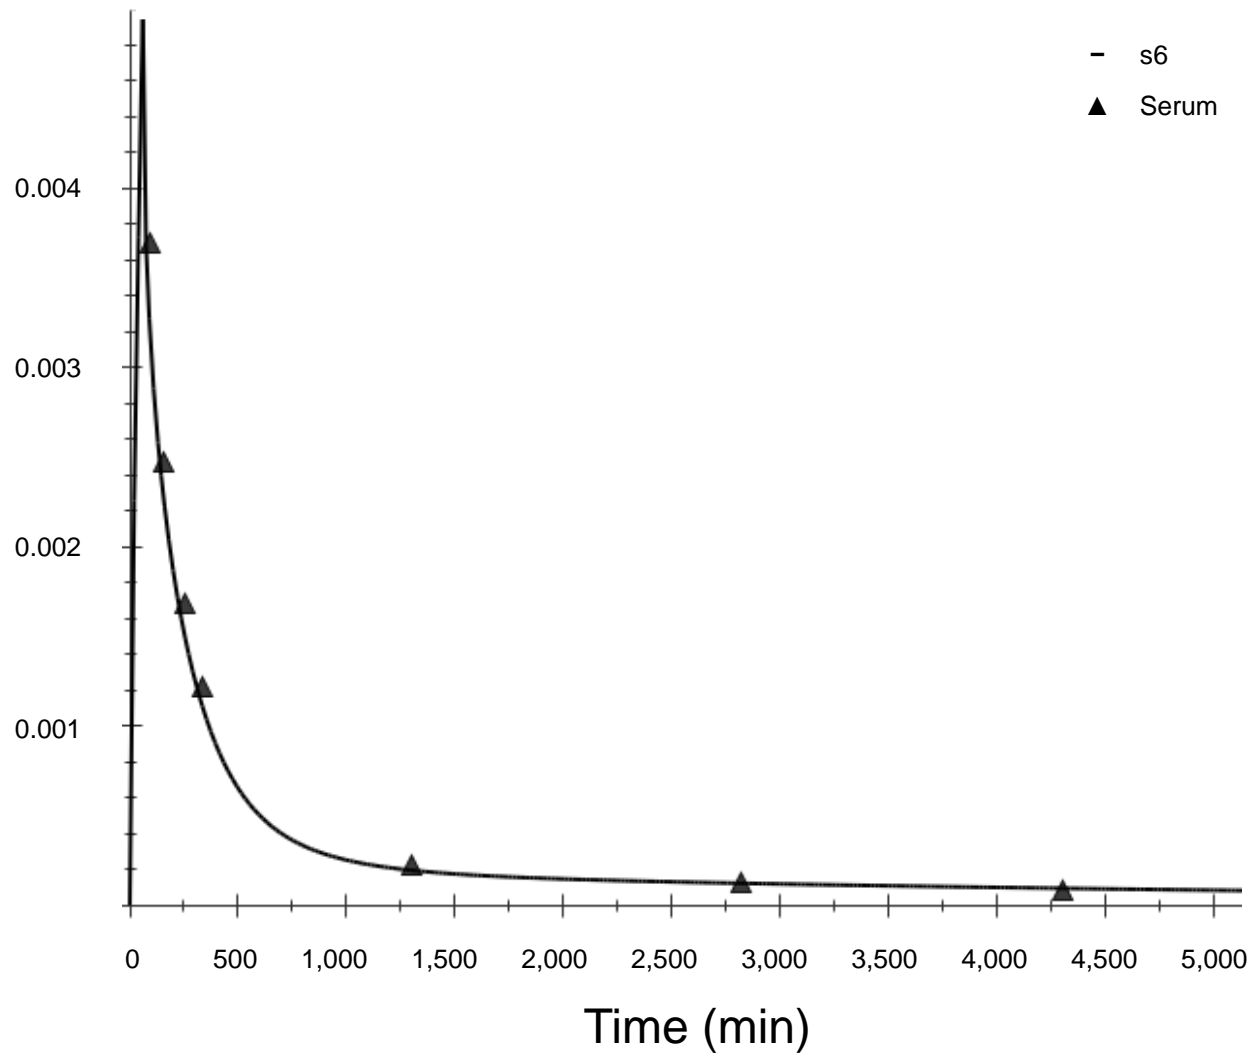

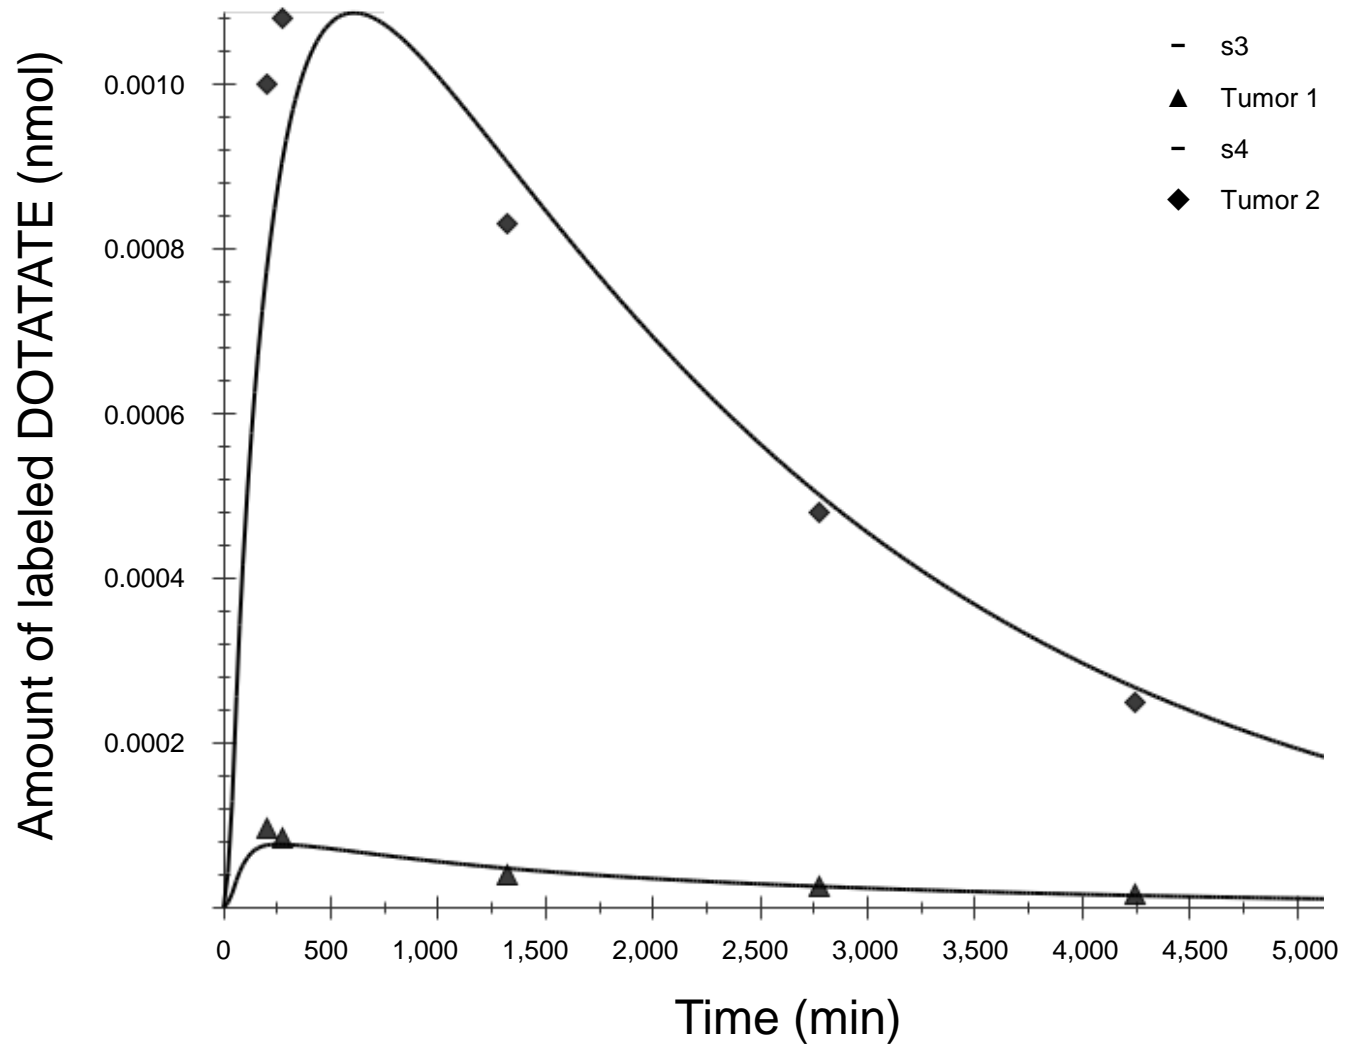

10A

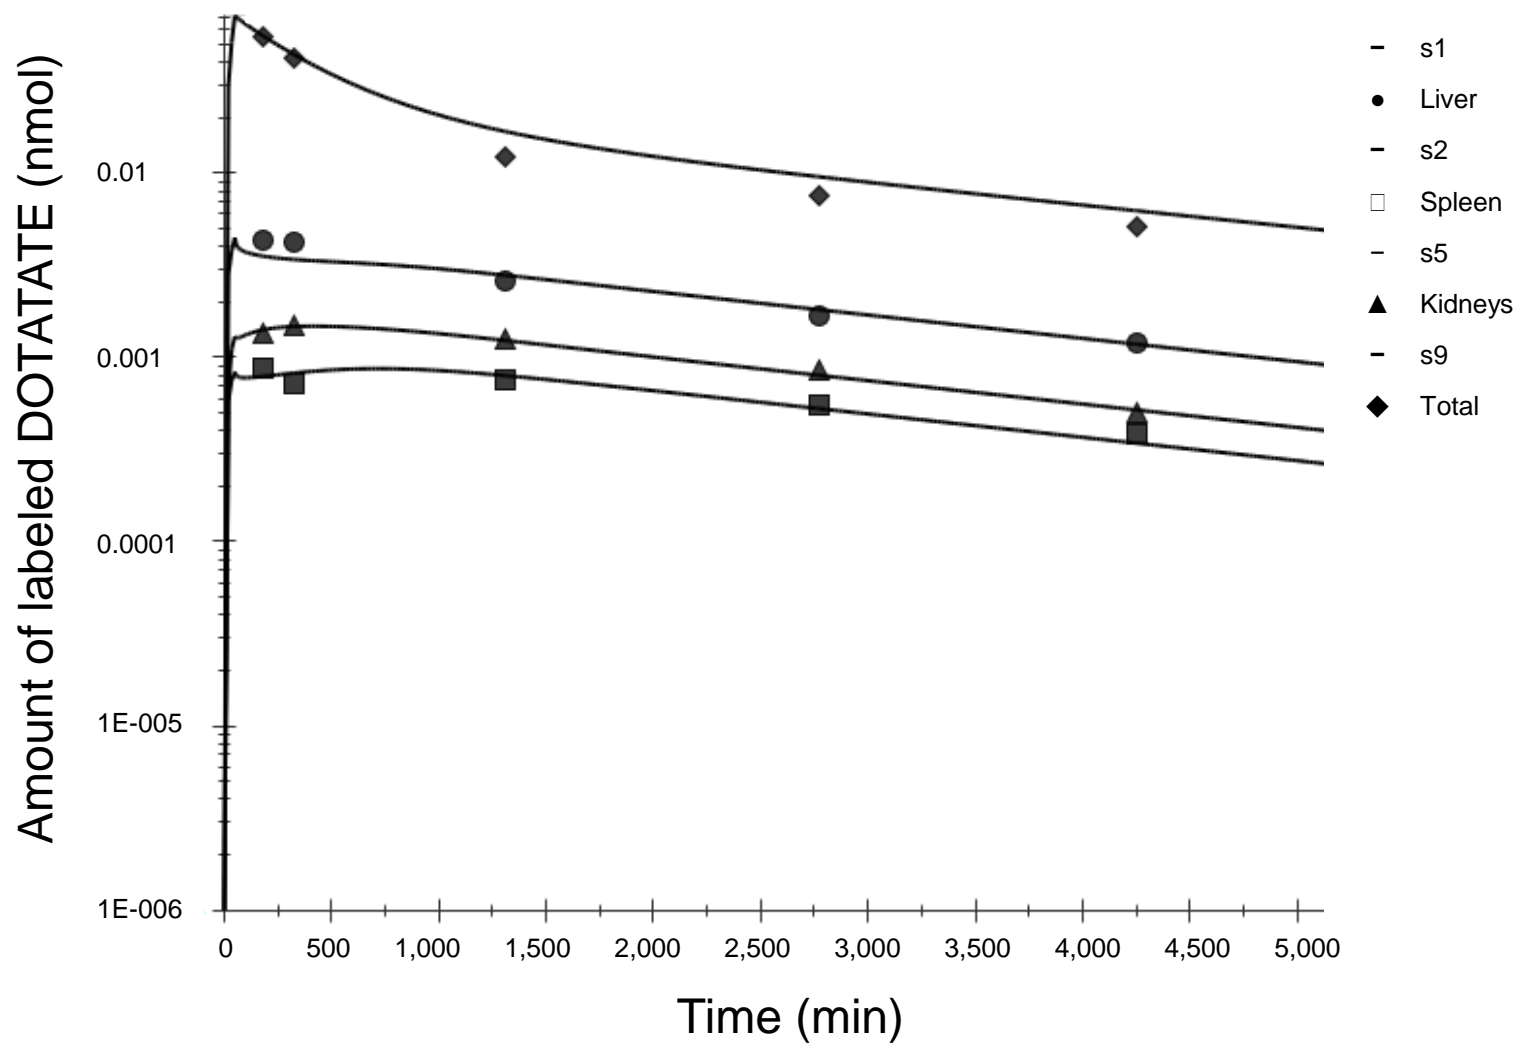

10B

Concentration of labeled DOTATATE (nmol/l)

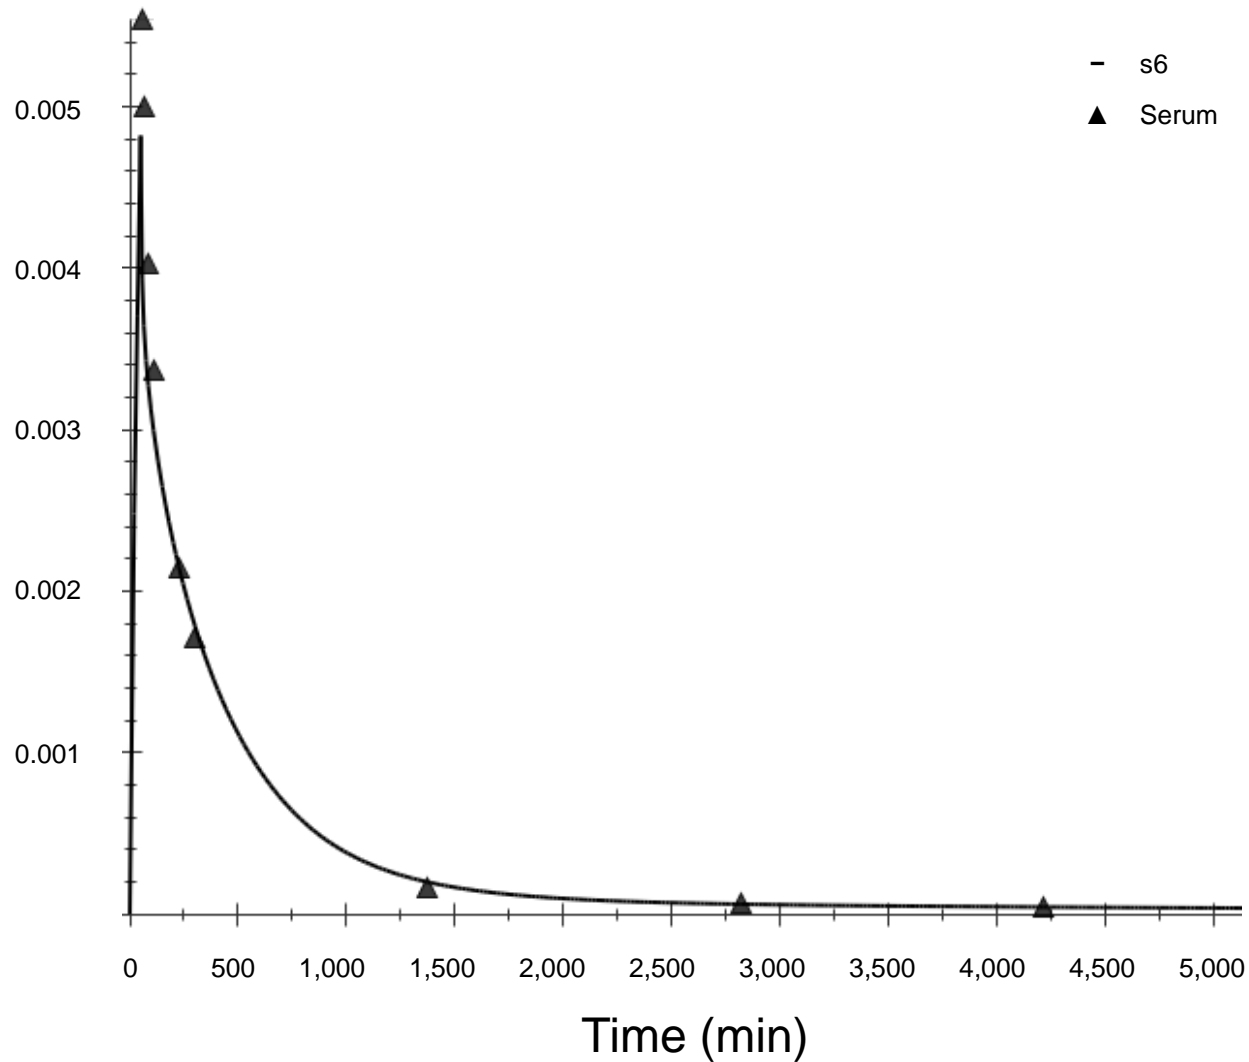

10C

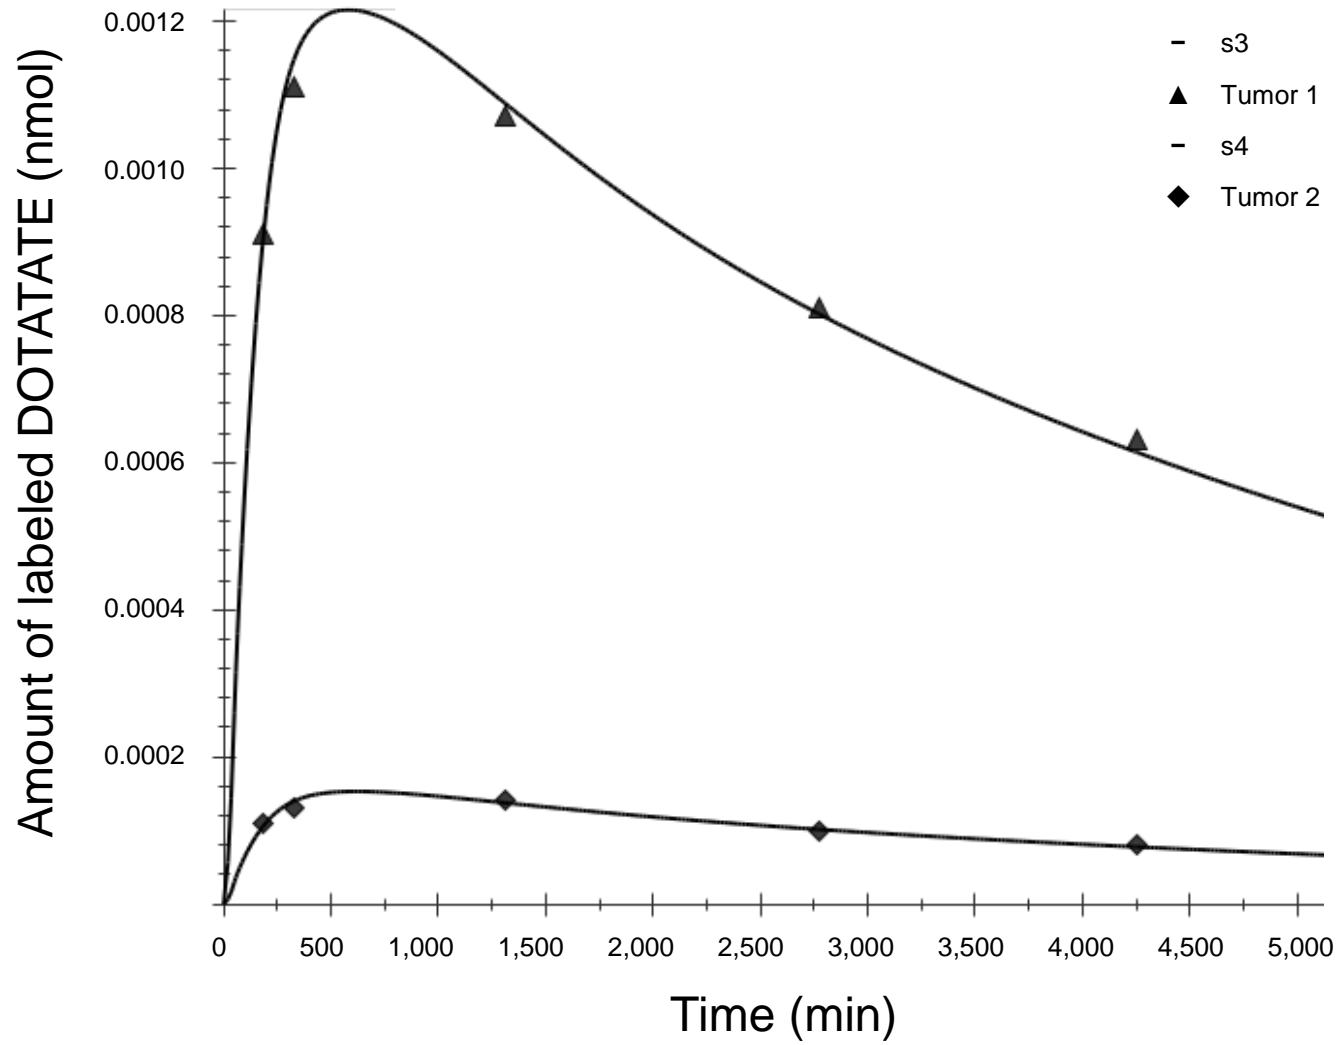

11A

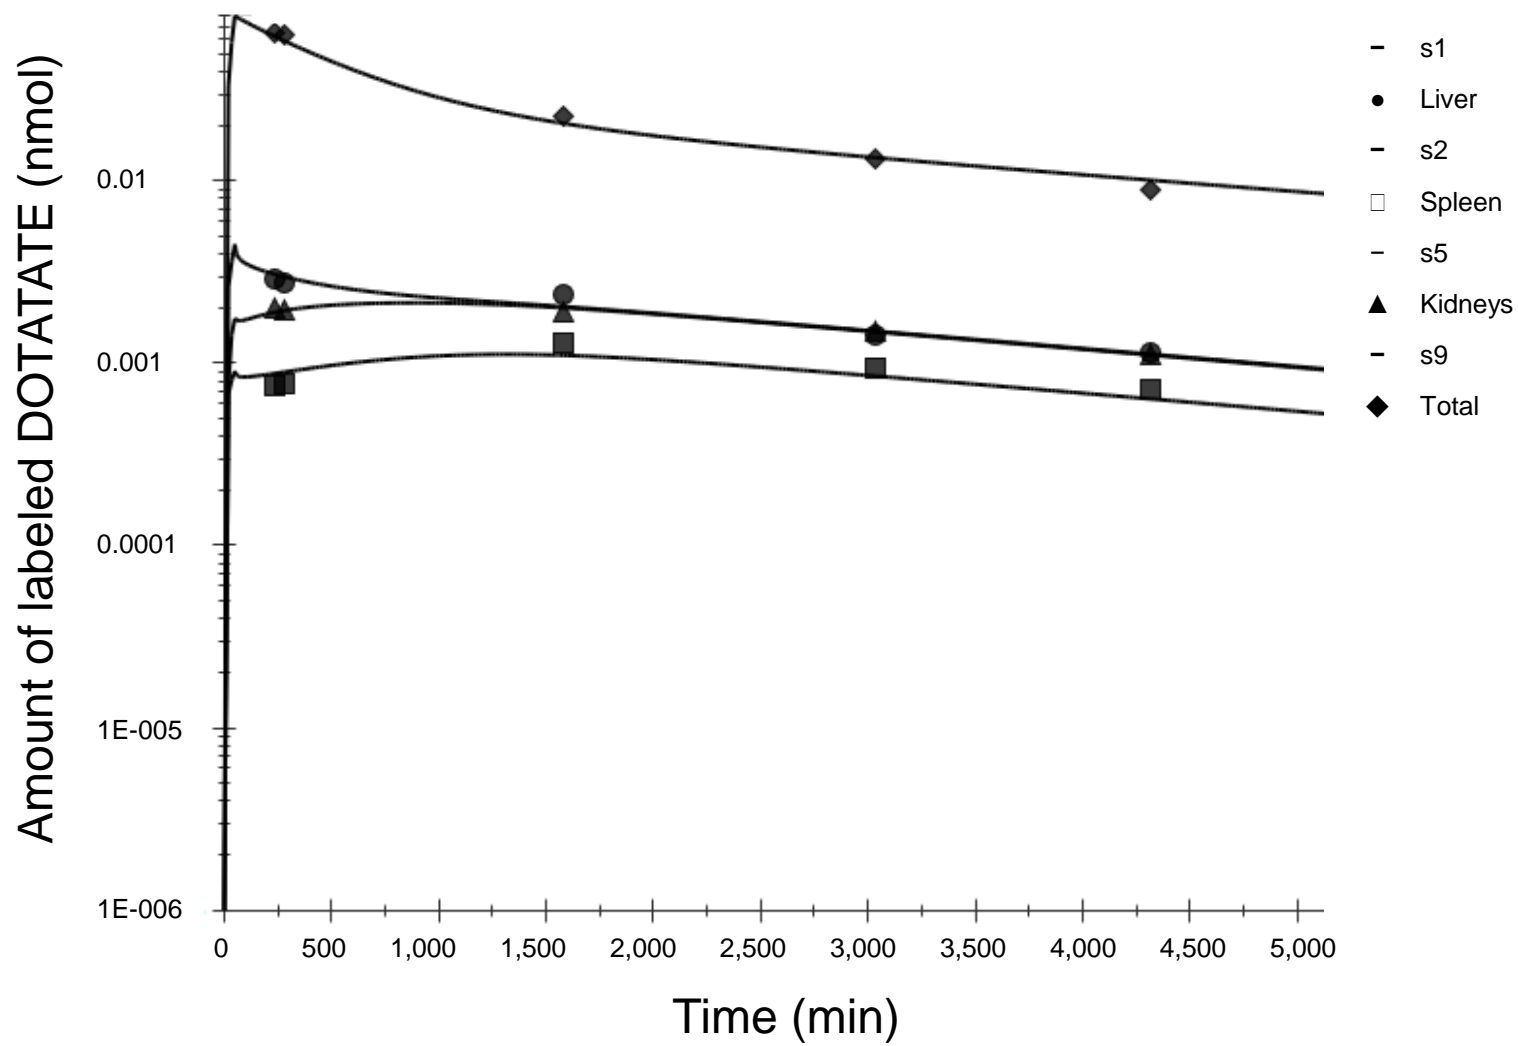

11B

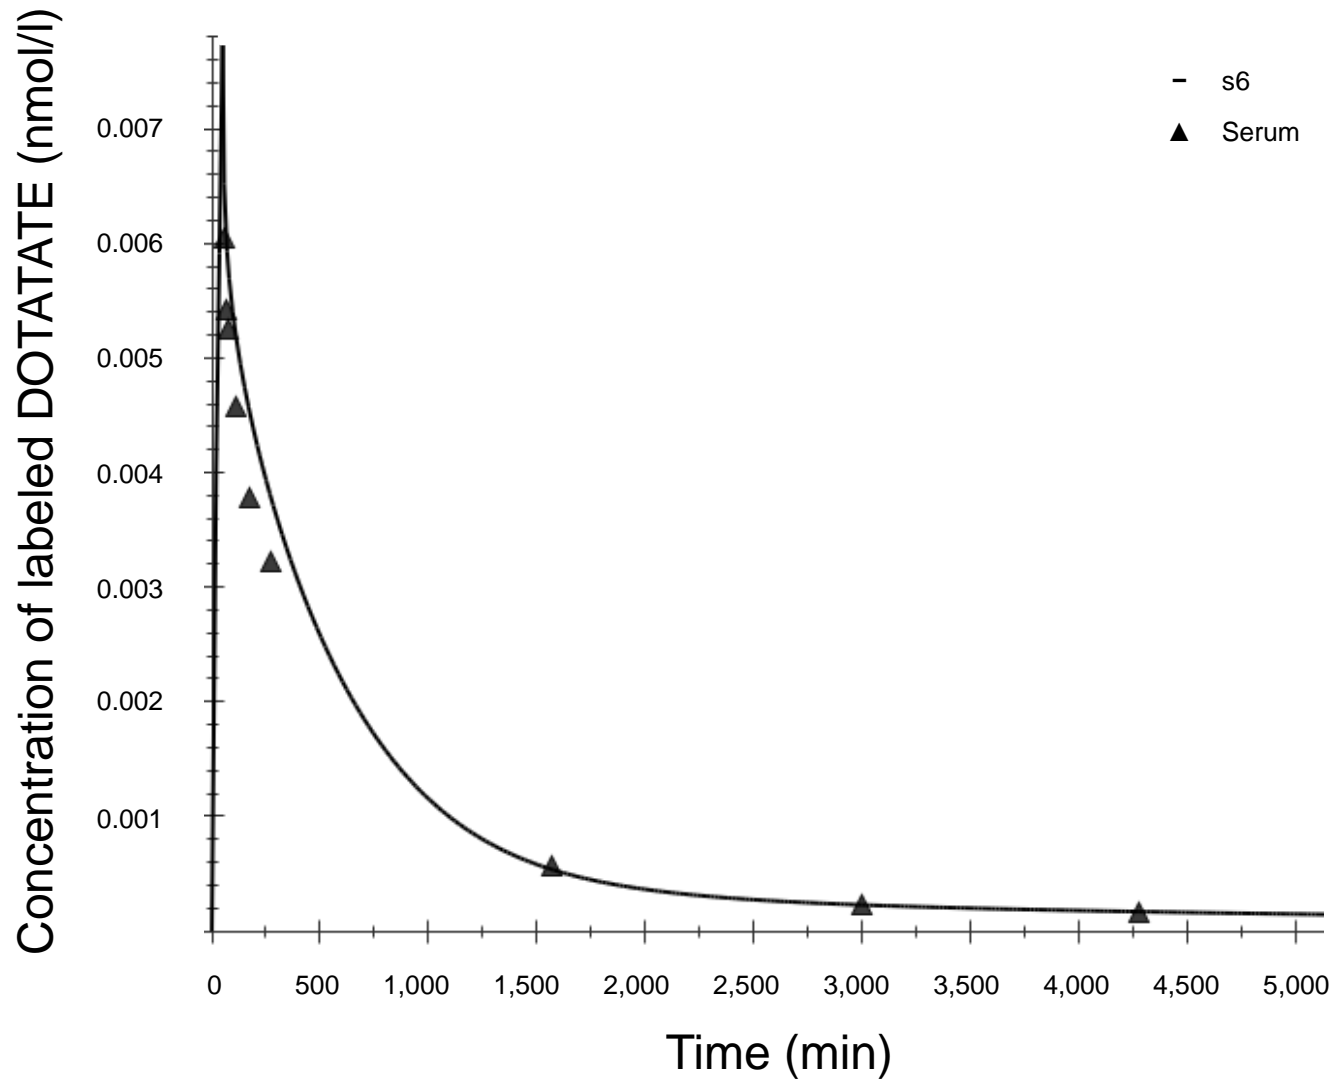



11C

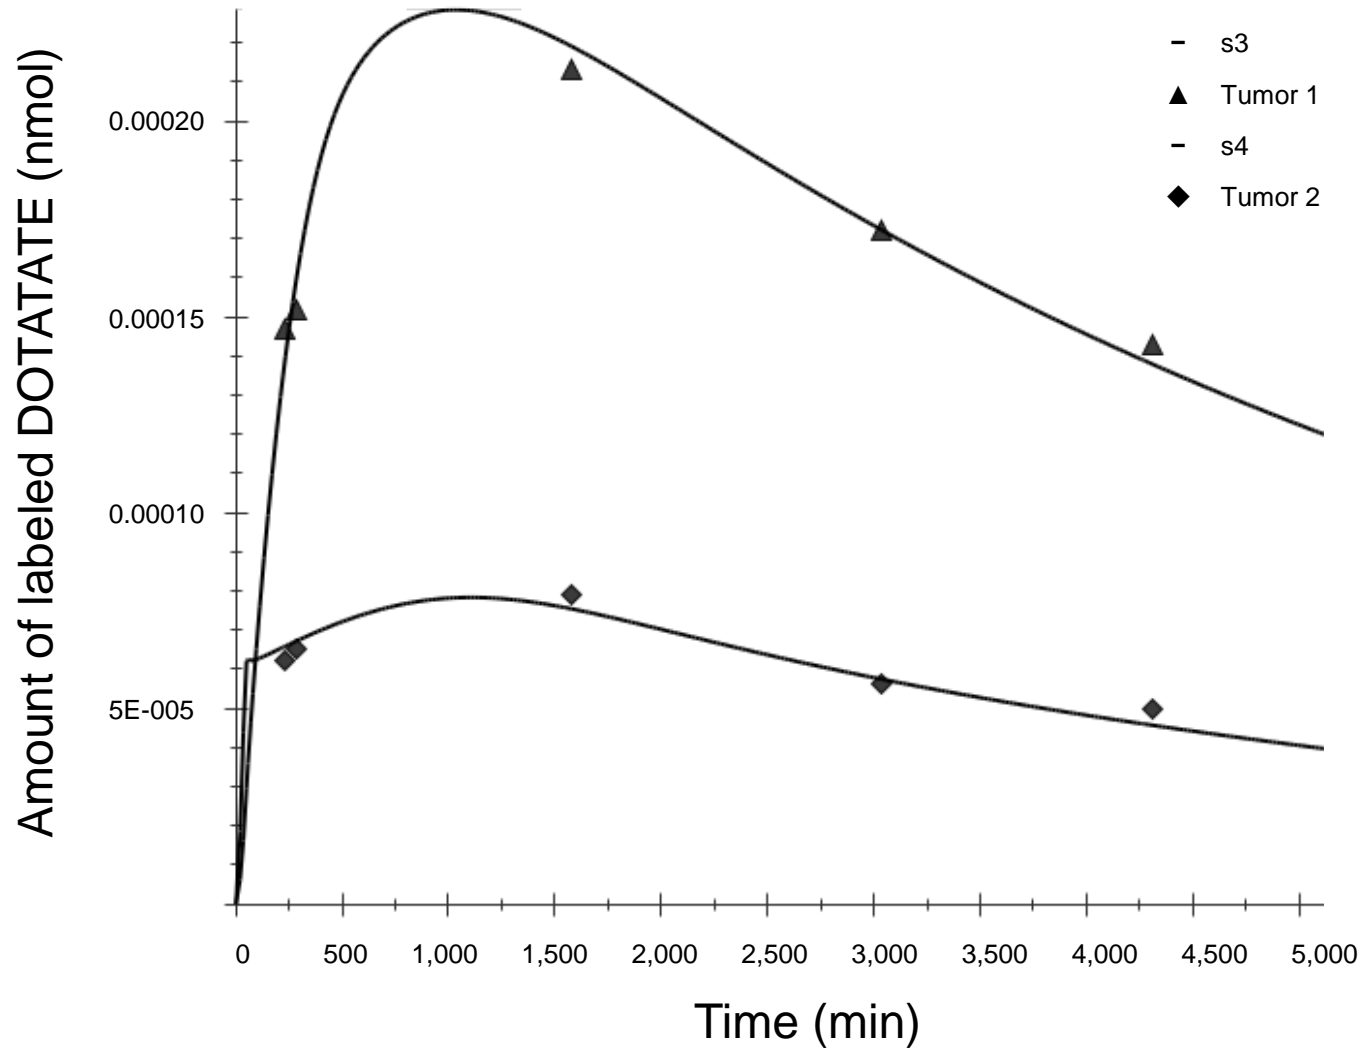

12A

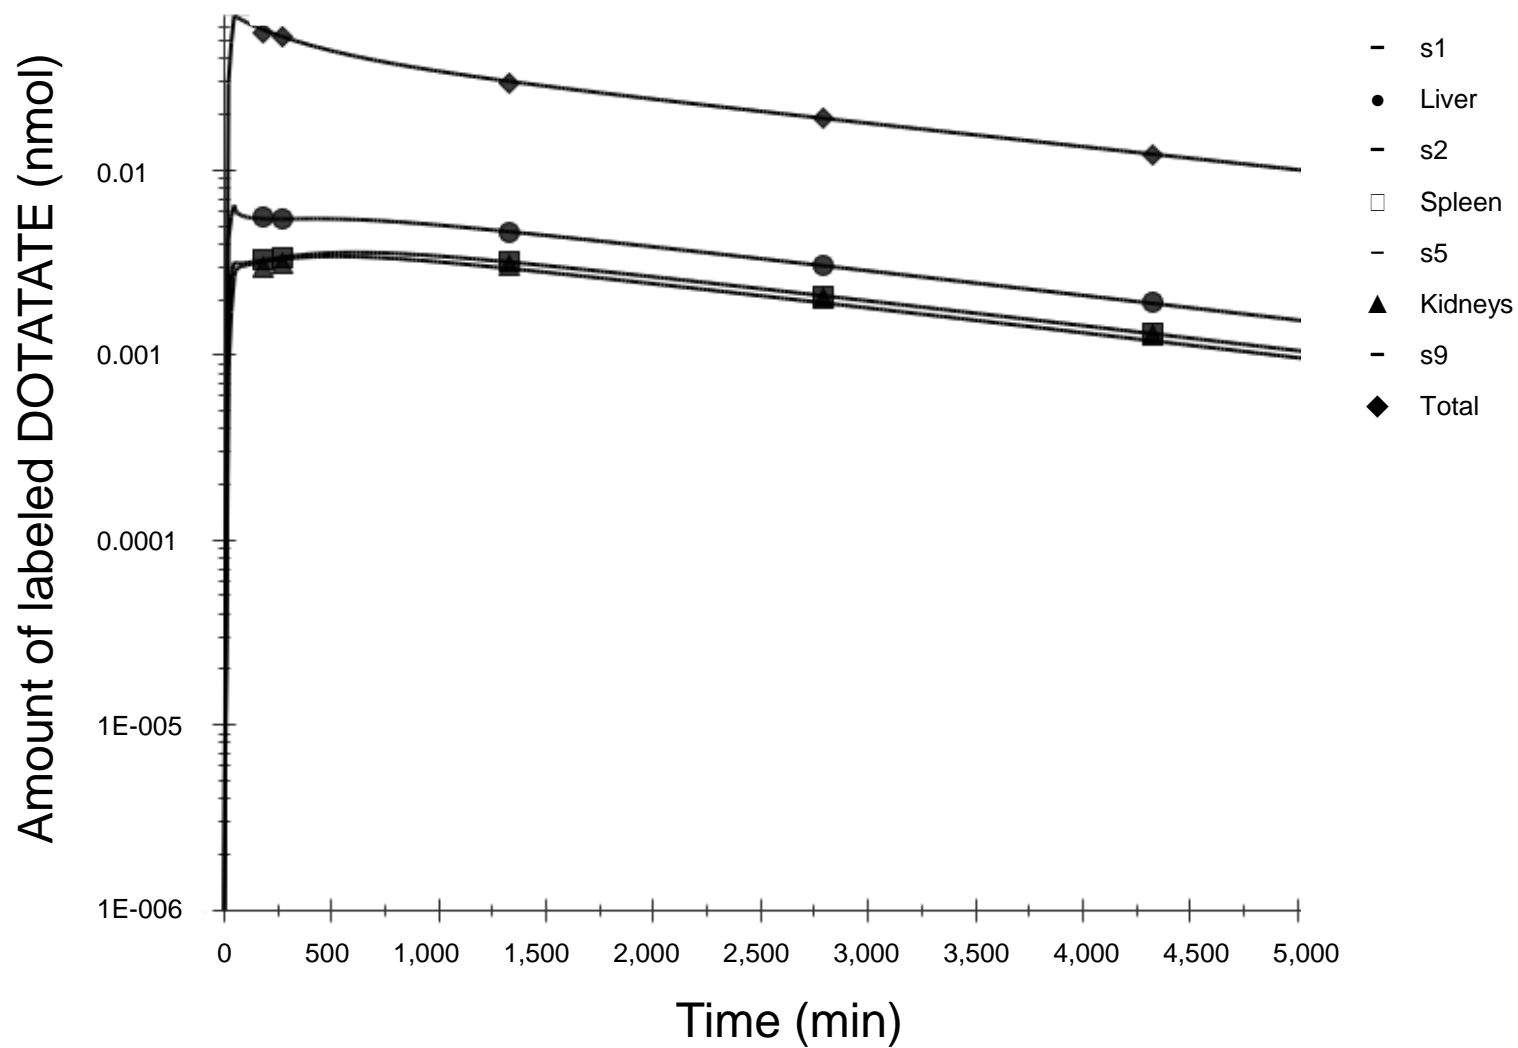

12B

Concentration of labeled DOTATATE (nmol/l)

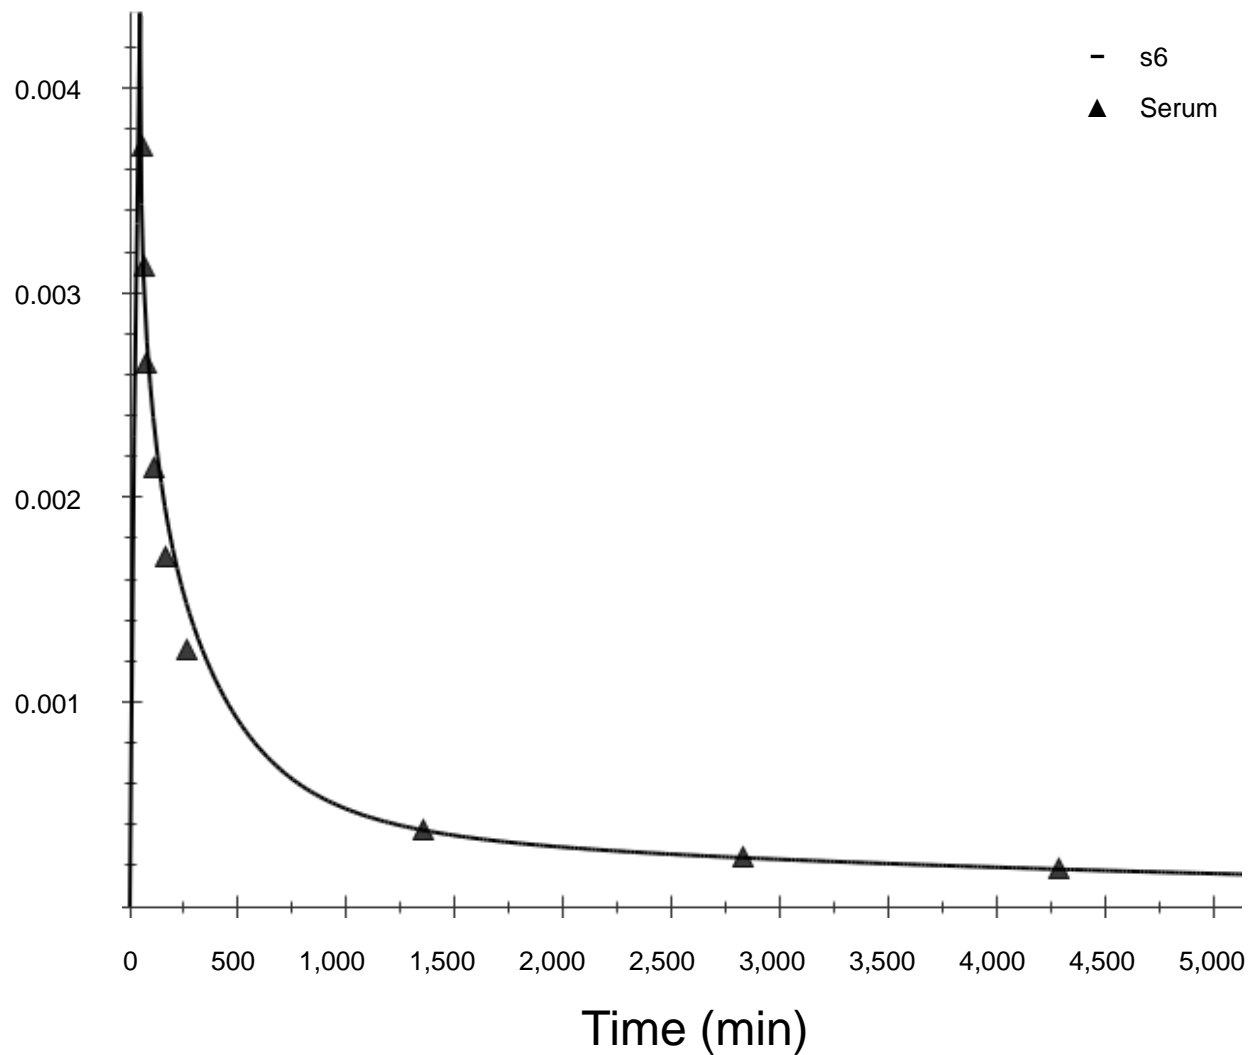

12C

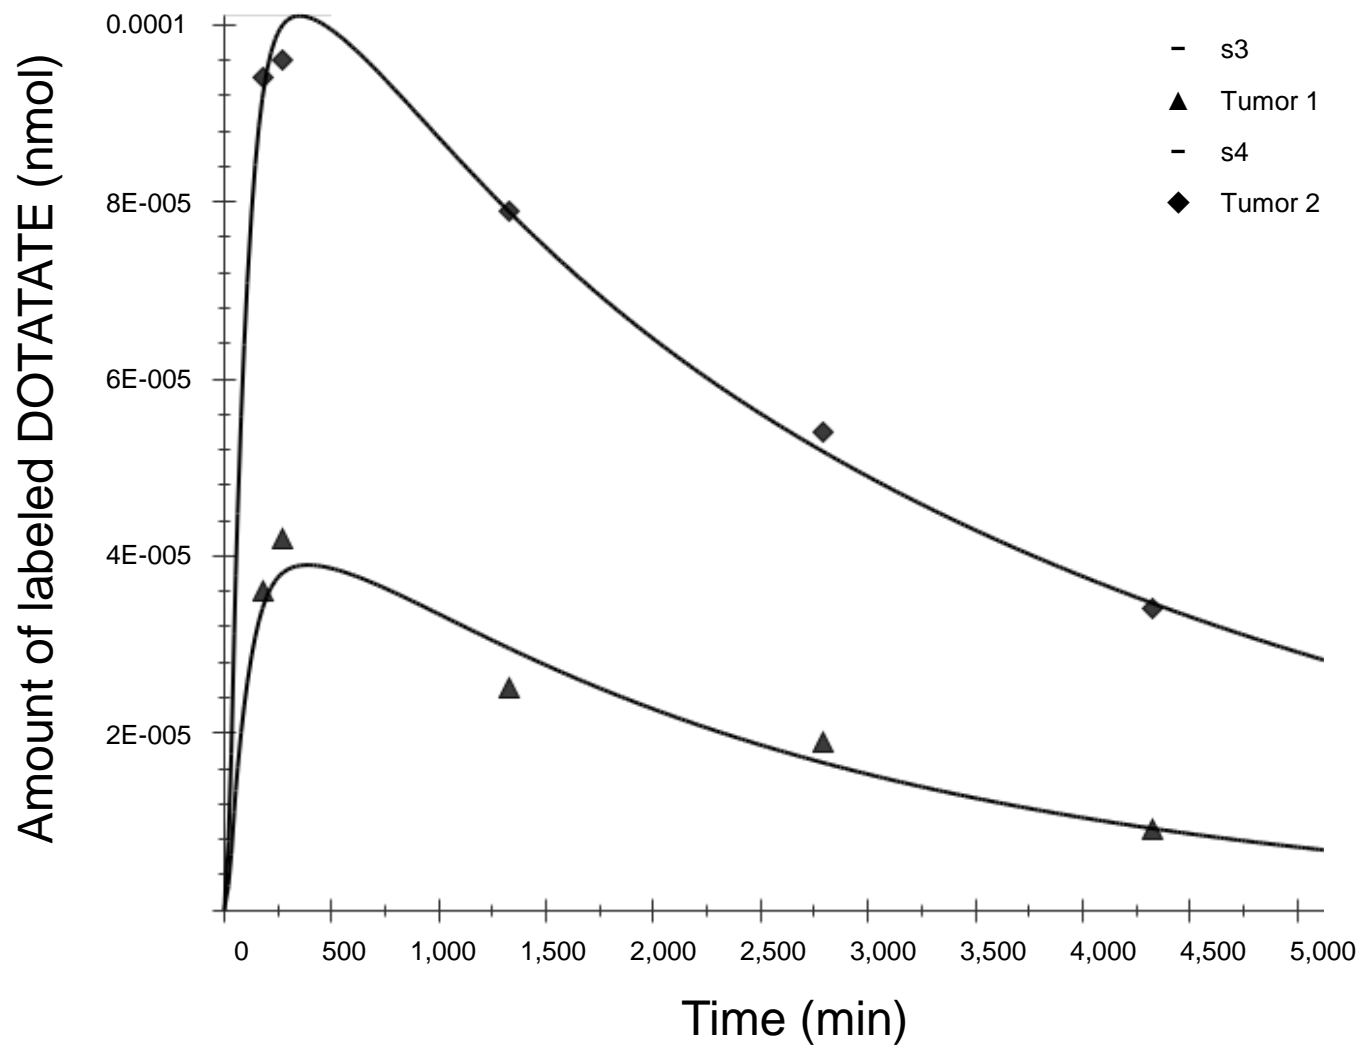

# Supplemental Data

Optimal BED ratio simulations for N1-N12 (Figures 1-12)

Figure 1

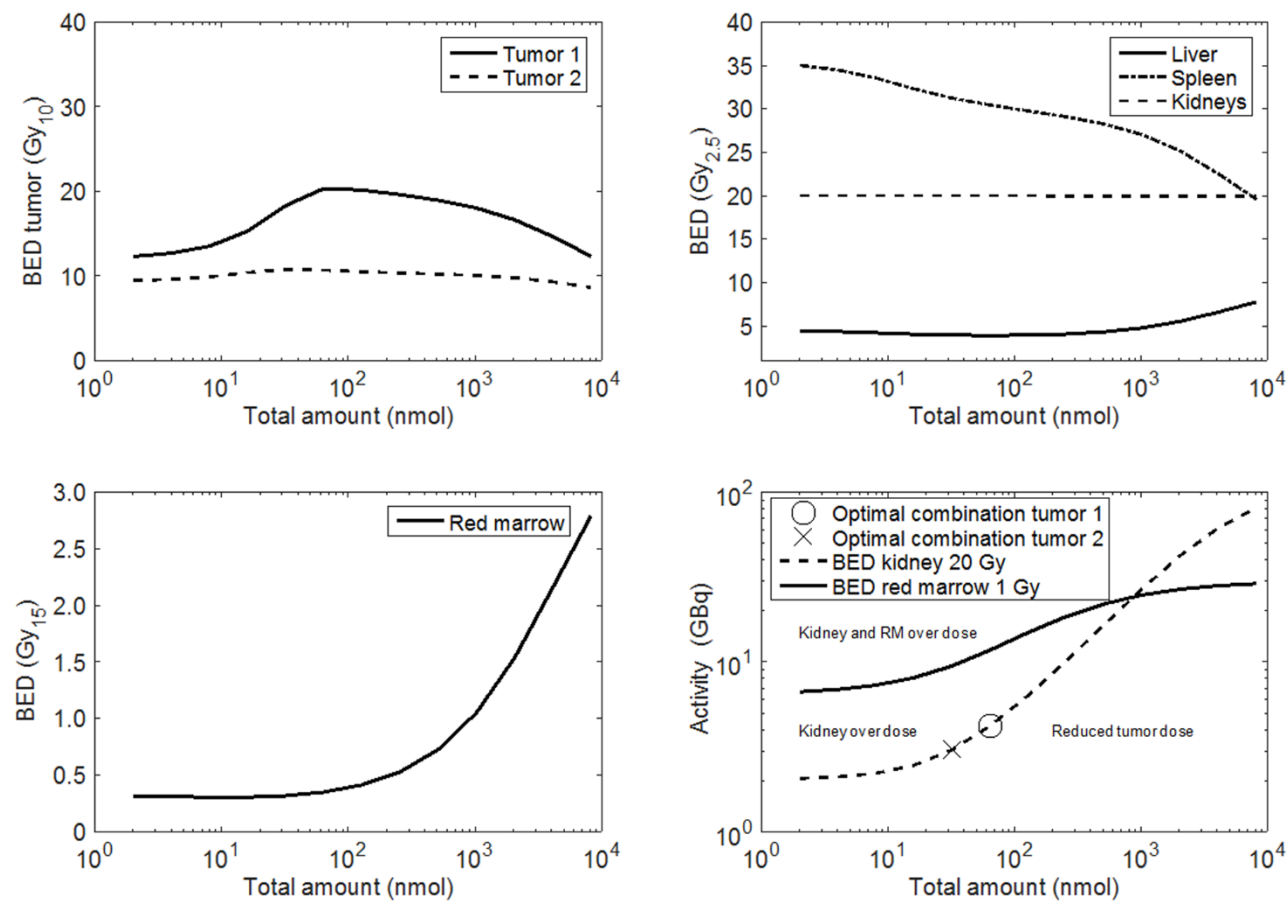

Figure 2

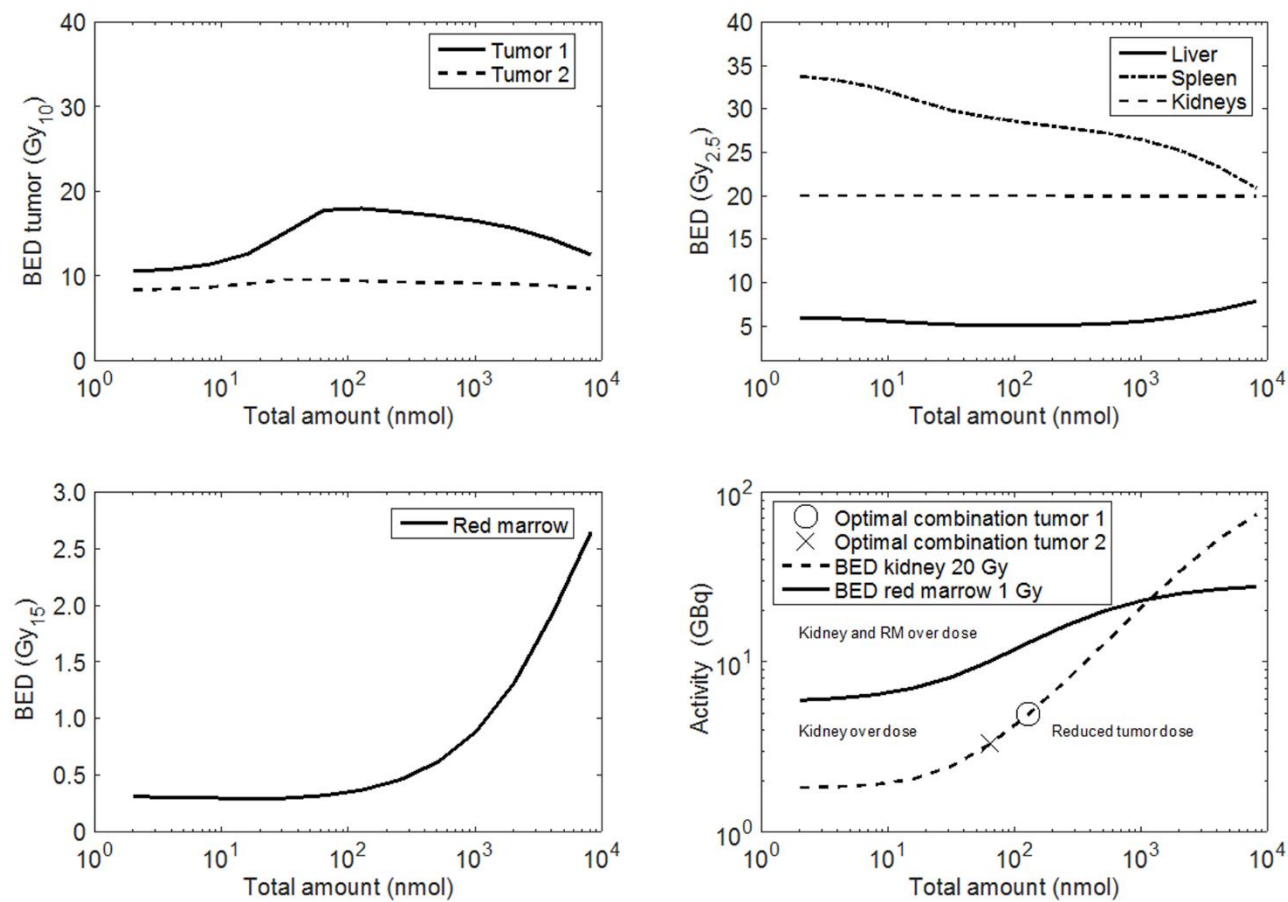

Figure 3

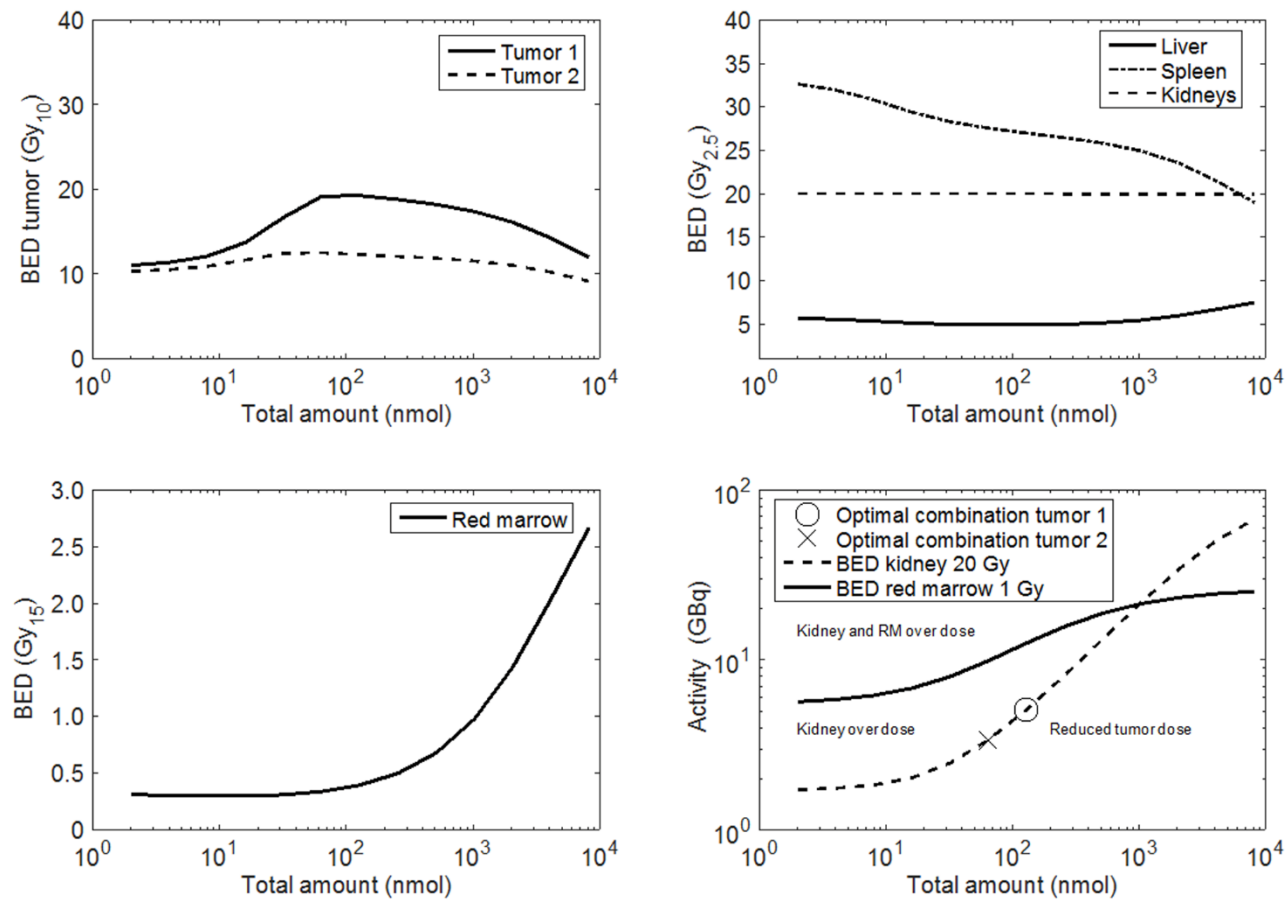



Figure 4

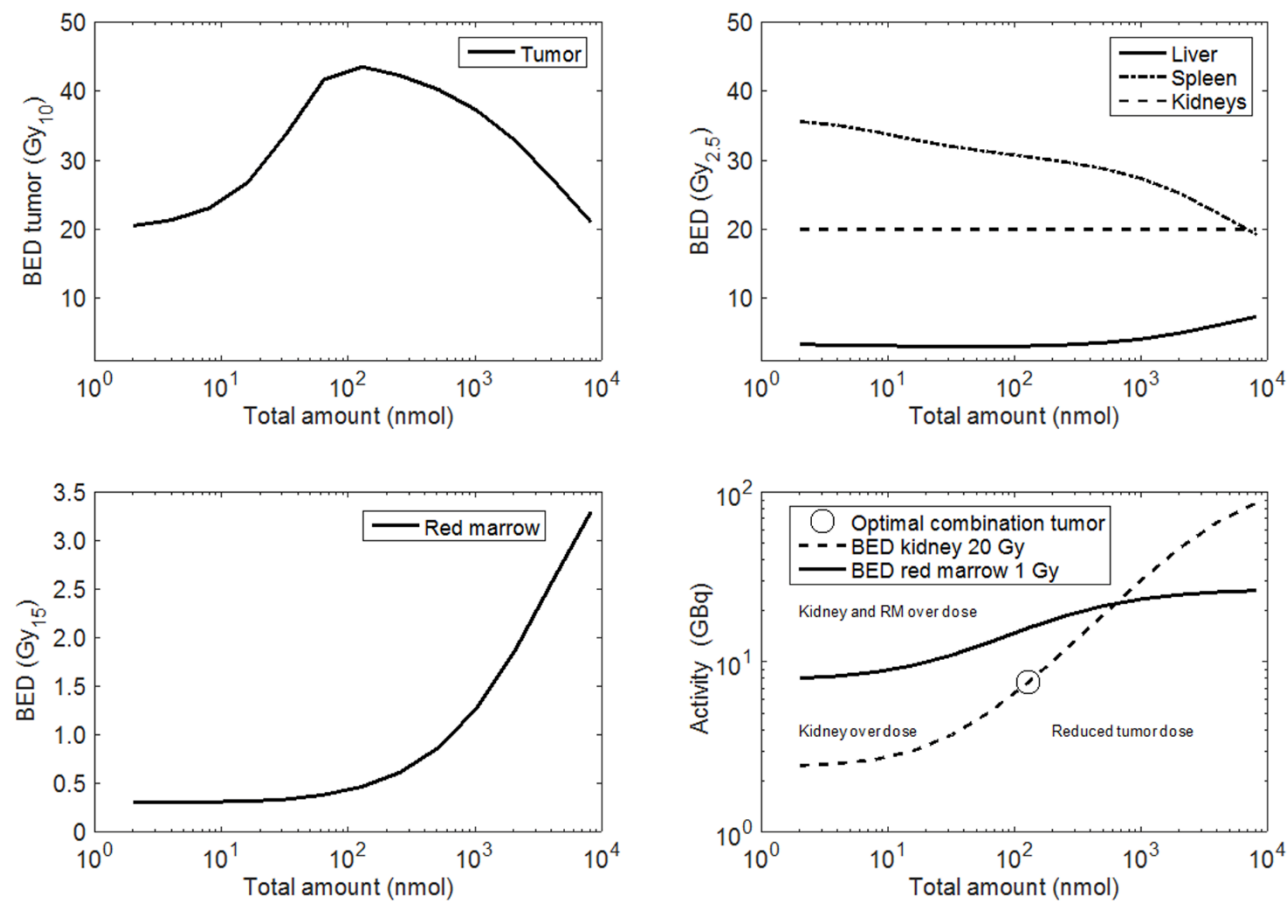

Figure 5

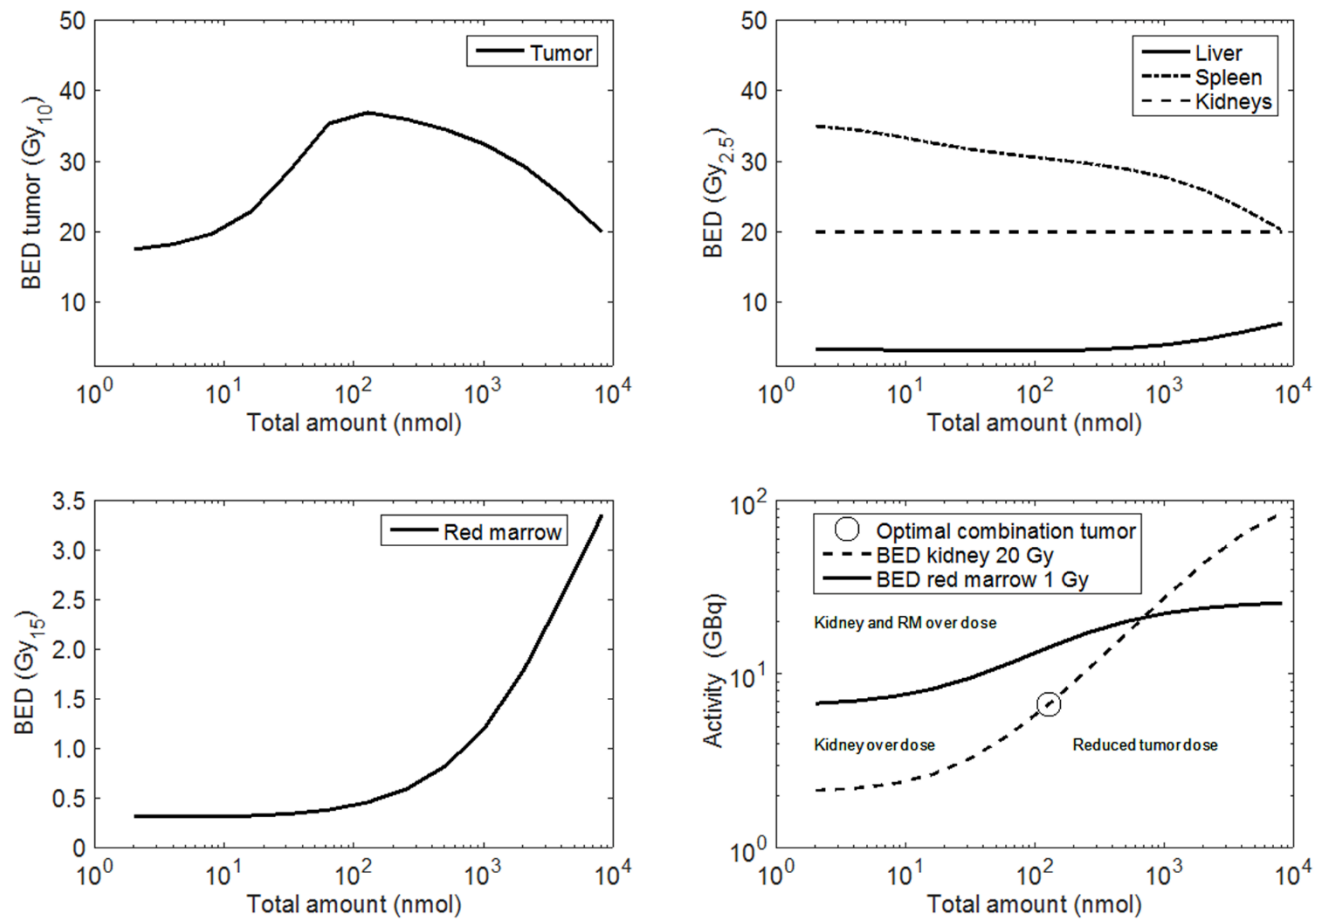

Figure 6

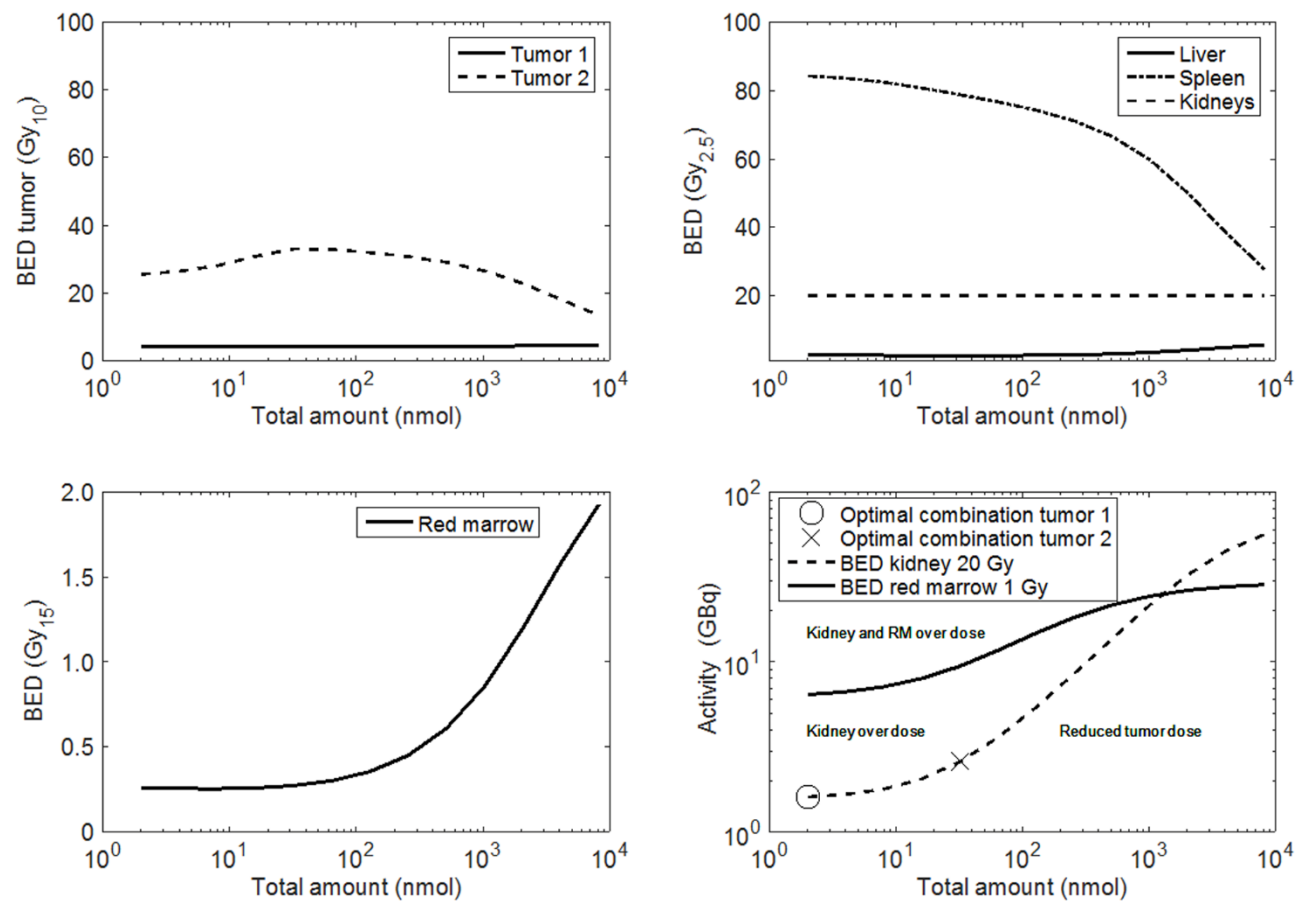

Figure 7

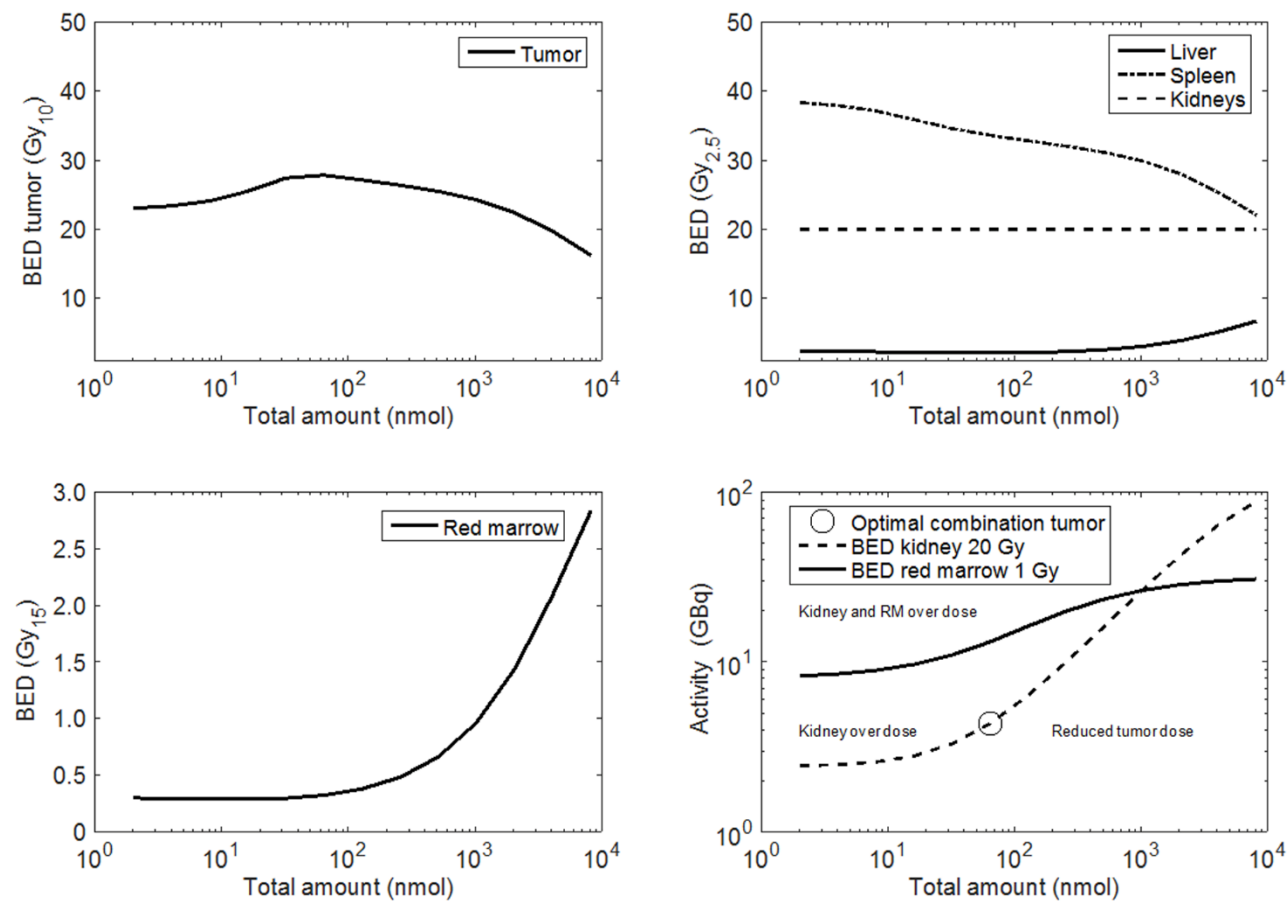

Figure 8

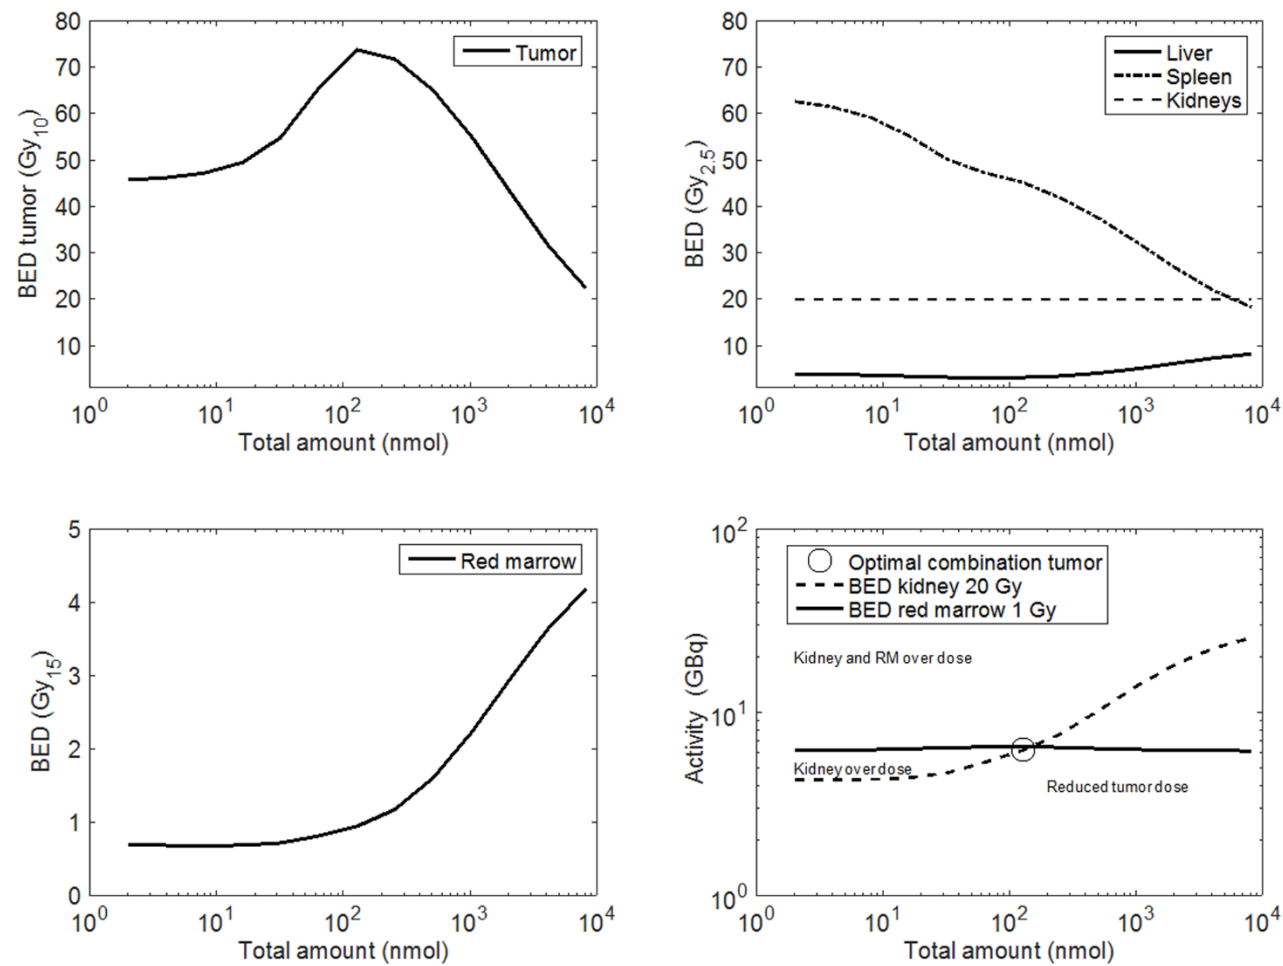

Figure 9

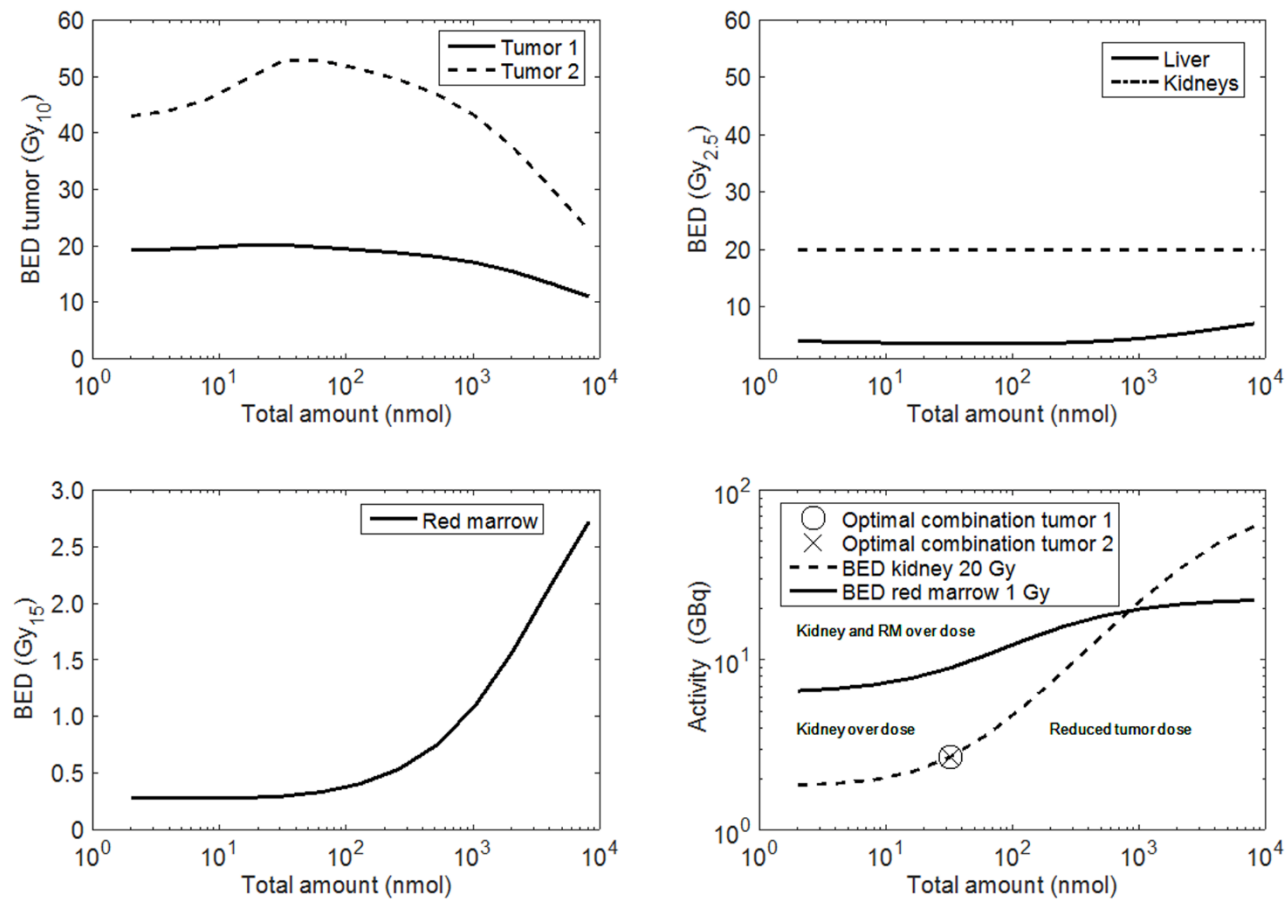

Figure 10

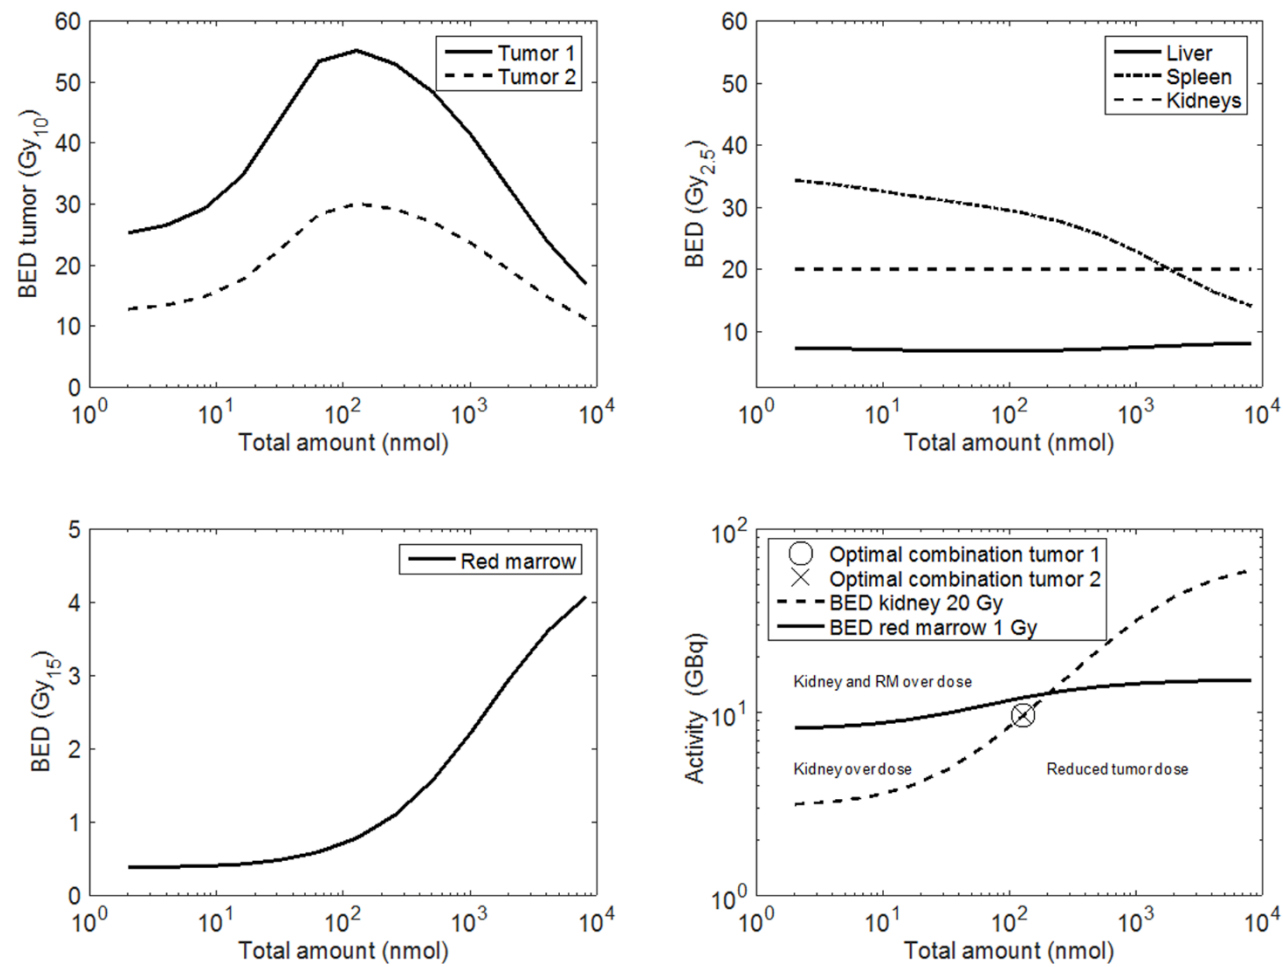

Figure 11

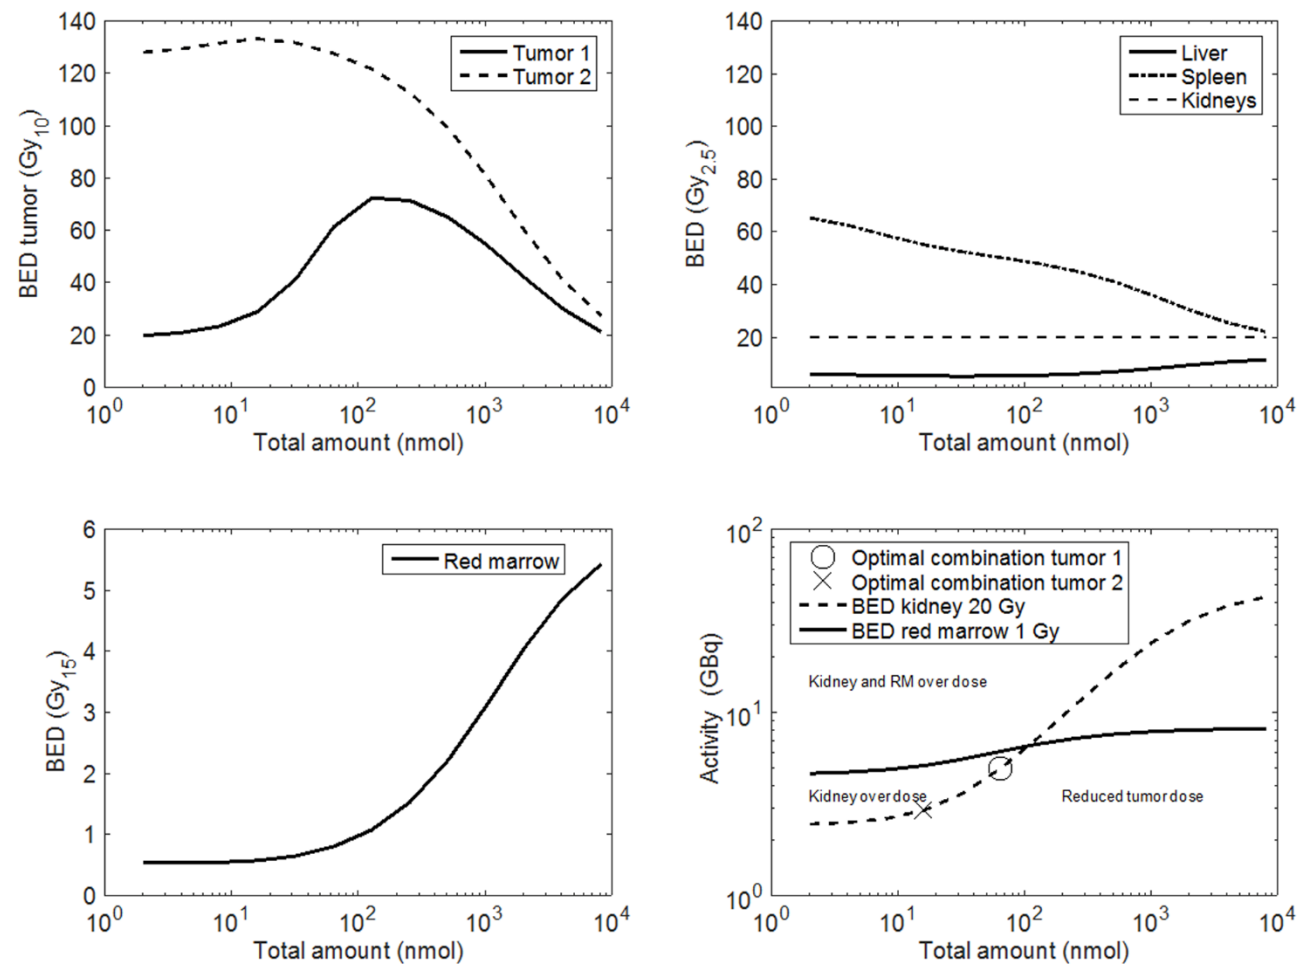



Figure 12

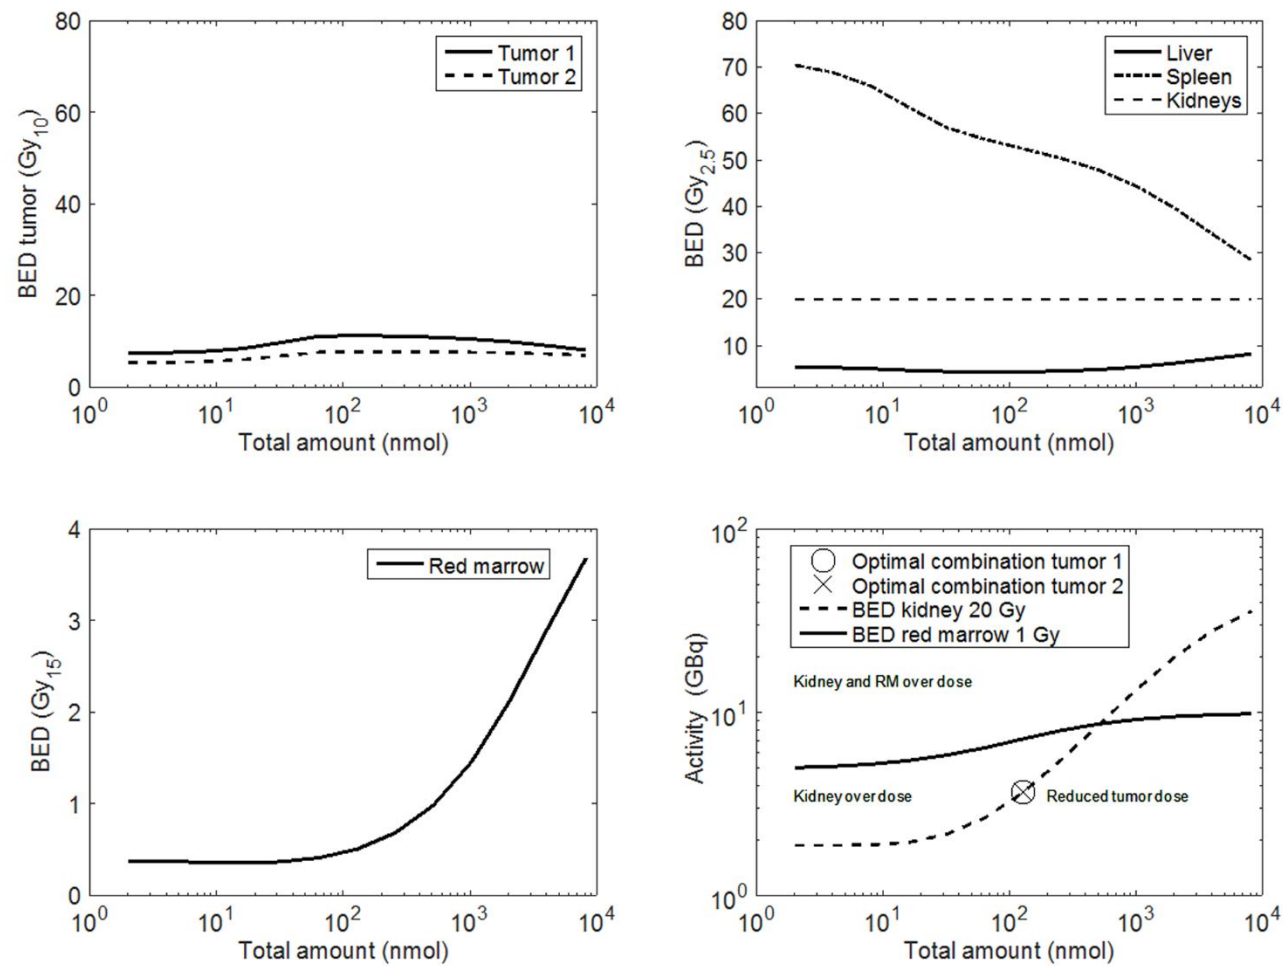

# Supplemental Data

internalization rate sensitivity analysis

Figure 1

Patient 2, N4

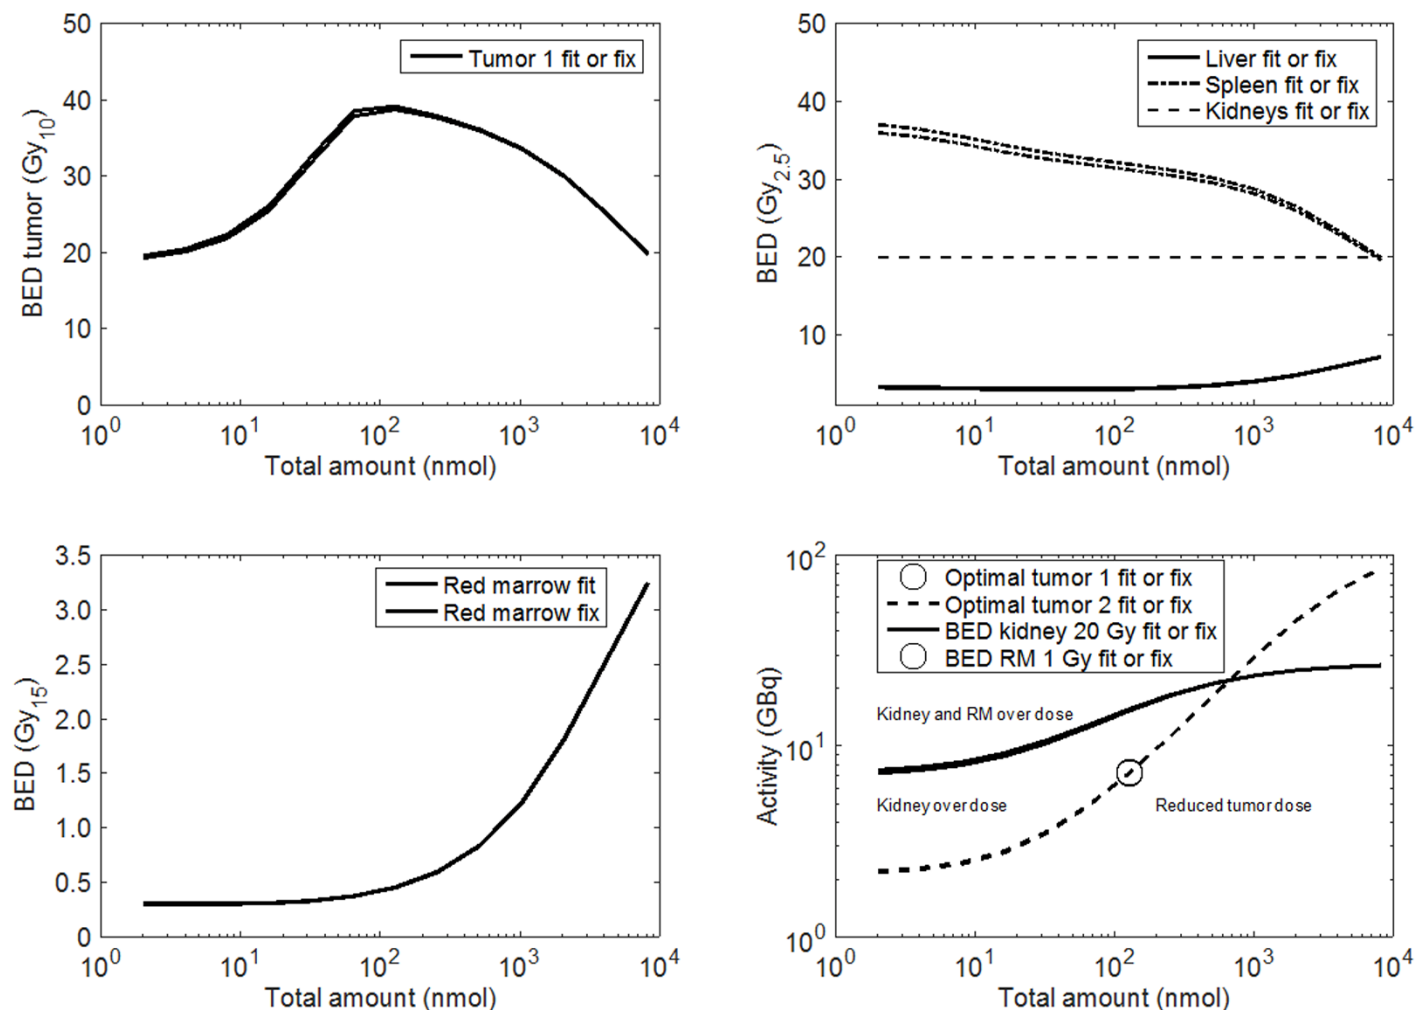

The internalisation rate was fixed due to high correlation. However, for the sensitivity analysis the internalisation rate was also fitted to the data. The fitted parameters of both cases were used for the simulations. The curves are very similar, as the assumed internalisation rate ( $0.0017 \text{ min}^{-1}$ ), is similar to the fitted ( $0.0023 \text{ min}^{-1}$ ) and small changes are compensated by changes in the receptor densities during the fitting process. If considerably larger or smaller internalisation rates are assumed and fixed, the model can not be adequately fitted (bad fits). Therefore, the assumption is reasonable and can be used for modelling and simulation.

Figure 2

Patient 7, N10

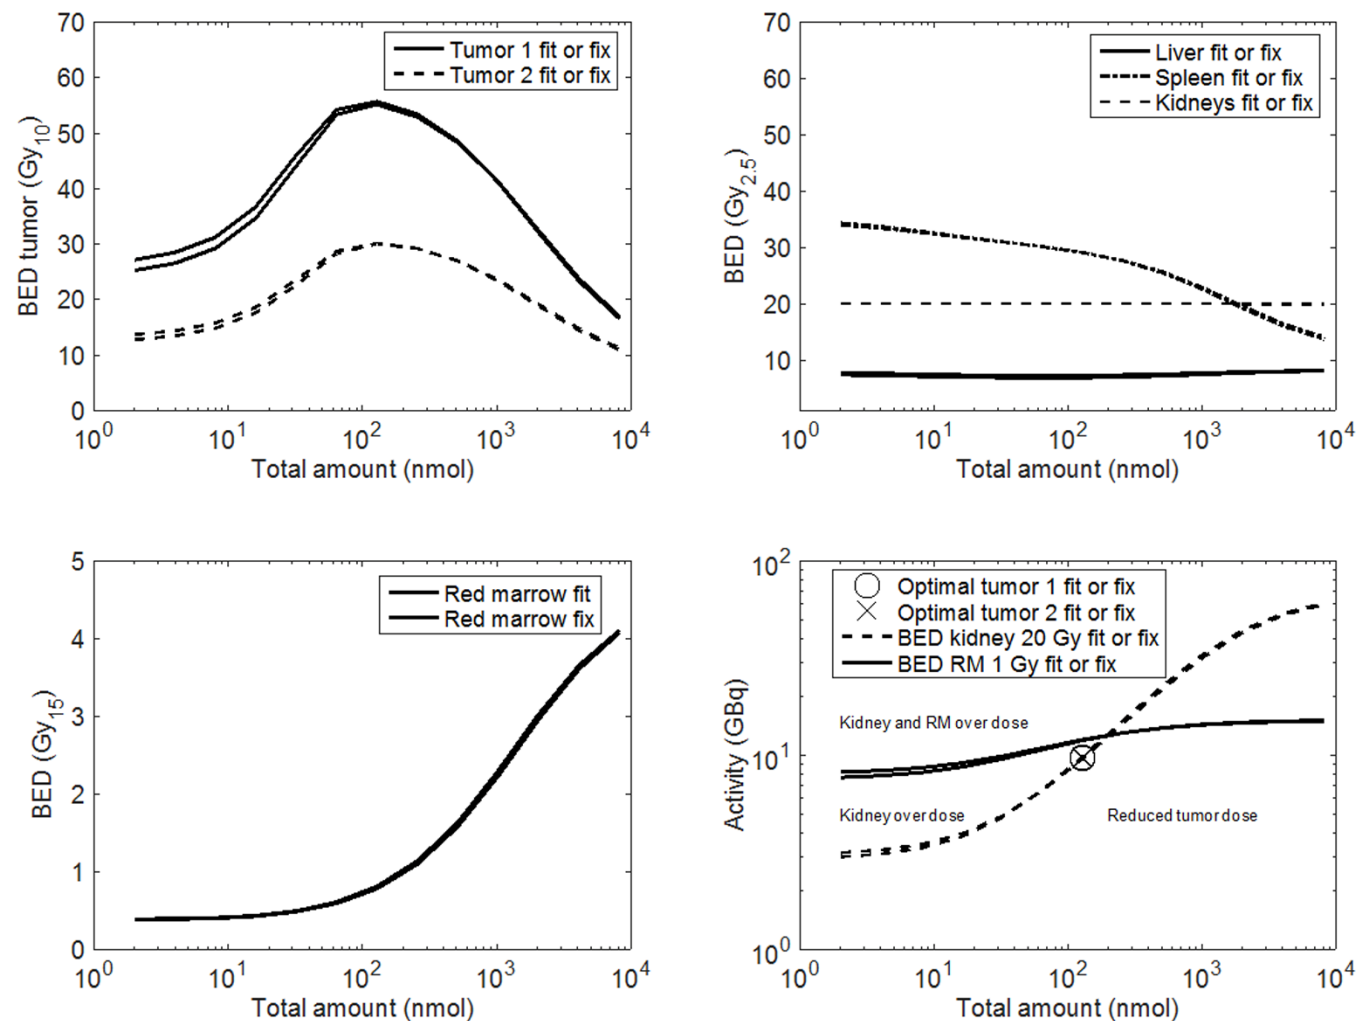

The internalisation rate was fixed due to high correlation. However, for the sensitivity analysis the internalisation rate was also fitted to the data. The fitted parameters of both cases were used for the simulations. The curves are very similar, as the assumed internalisation rate ( $0.0017 \text{ min}^{-1}$ ), is similar to the fitted ( $0.001 \text{ min}^{-1}$ ) and small changes are compensated by changes in the receptor densities during the fitting process. If considerably larger or smaller internalisation rates are assumed and fixed, the model can not be adequately fitted (bad fits). Therefore, the assumption is reasonable and can be used for modelling and simulation.
